# Supplementary material for: Cross-sectional study to develop and describe psychometric characteristics of a patient-reported instrument (PROFFIT) for measuring financial toxicity of cancer within a public healthcare system
Source: PubMed Central journal article supplement — BMJ Open. 2021 Oct 20;11(10):e049128. doi: 10.1136/bmjopen-2021-049128 (PMC8529986; doi:10.1136/bmjopen-2021-049128), 2021-10-20
Supplement: bmjopen-2021-049128.draft_revisions.pdf [file bmjopen-2021-049128.draft_revisions.pdf]

# BMJ Open

BMJ Open is committed to open peer review. As part of this commitment we make the peer review history of every article we publish publicly available.

When an article is published we post the peer reviewers' comments and the authors' responses online. We also post the versions of the paper that were used during peer review. These are the versions that the peer review comments apply to.

The versions of the paper that follow are the versions that were submitted during the peer review process. They are not the versions of record or the final published versions. They should not be cited or distributed as the published version of this manuscript.

BMJ Open is an open access journal and the full, final, typeset and author-corrected version of record of the manuscript is available on our site with no access controls, subscription charges or pay-per-view fees (<http://bmjopen.bmj.com>).

If you have any questions on BMJ Open's open peer review process please email [info.bmjopen@bmj.com](mailto:info.bmjopen@bmj.com)

# BMJ Open

## Development of PROFFIT, a patient-reported instrument for measuring financial toxicity of cancer within a public healthcare system

|                               |                                                                                                                                                                                                                                                                                                                                                                                                                                                                                                                                                                                                                                                                                                                                                                                                                                                                                                                                                                                                                                                                                                                                                                                                                                                                                                                                                                                                                                                                                                                                                                                                                                                                                                                                                                                                                                                                                                                                                                                                                                                                                                                                                                                                                                                                     |
|-------------------------------|---------------------------------------------------------------------------------------------------------------------------------------------------------------------------------------------------------------------------------------------------------------------------------------------------------------------------------------------------------------------------------------------------------------------------------------------------------------------------------------------------------------------------------------------------------------------------------------------------------------------------------------------------------------------------------------------------------------------------------------------------------------------------------------------------------------------------------------------------------------------------------------------------------------------------------------------------------------------------------------------------------------------------------------------------------------------------------------------------------------------------------------------------------------------------------------------------------------------------------------------------------------------------------------------------------------------------------------------------------------------------------------------------------------------------------------------------------------------------------------------------------------------------------------------------------------------------------------------------------------------------------------------------------------------------------------------------------------------------------------------------------------------------------------------------------------------------------------------------------------------------------------------------------------------------------------------------------------------------------------------------------------------------------------------------------------------------------------------------------------------------------------------------------------------------------------------------------------------------------------------------------------------|
| Journal:                      | <i>BMJ Open</i>                                                                                                                                                                                                                                                                                                                                                                                                                                                                                                                                                                                                                                                                                                                                                                                                                                                                                                                                                                                                                                                                                                                                                                                                                                                                                                                                                                                                                                                                                                                                                                                                                                                                                                                                                                                                                                                                                                                                                                                                                                                                                                                                                                                                                                                     |
| Manuscript ID                 | bmjopen-2021-049128                                                                                                                                                                                                                                                                                                                                                                                                                                                                                                                                                                                                                                                                                                                                                                                                                                                                                                                                                                                                                                                                                                                                                                                                                                                                                                                                                                                                                                                                                                                                                                                                                                                                                                                                                                                                                                                                                                                                                                                                                                                                                                                                                                                                                                                 |
| Article Type:                 | Original research                                                                                                                                                                                                                                                                                                                                                                                                                                                                                                                                                                                                                                                                                                                                                                                                                                                                                                                                                                                                                                                                                                                                                                                                                                                                                                                                                                                                                                                                                                                                                                                                                                                                                                                                                                                                                                                                                                                                                                                                                                                                                                                                                                                                                                                   |
| Date Submitted by the Author: | 01-Feb-2021                                                                                                                                                                                                                                                                                                                                                                                                                                                                                                                                                                                                                                                                                                                                                                                                                                                                                                                                                                                                                                                                                                                                                                                                                                                                                                                                                                                                                                                                                                                                                                                                                                                                                                                                                                                                                                                                                                                                                                                                                                                                                                                                                                                                                                                         |
| Complete List of Authors:     | <p>Riva, Silvia; St Mary's University; University Hospital of Milan<br/> Arenare, Laura<br/> Di Maio, Massimo; Università degli Studi di Torino, Dipartimento di Oncologia, AO Ordine Mauriziano<br/> Efficace, Fabio; Italian Group for Adult Hematologic Diseases (GIMEMA)<br/> Montesarchio, Vincenzo; AORN Ospedali dei Colli, Oncologia<br/> Frontini, Luciano; Federation of Italian Cooperative Oncology Groups (FICOG)<br/> Giannarelli, Diana; Istituto Nazionale per lo Studio e la Cura dei Tumori Regina Elena, IRCCS, Unità di Biostatistica<br/> Bryce, Jane; Istituto Nazionale Tumori IRCCS Fondazione Pascale, Unità Sperimentazioni Cliniche<br/> Del Campo, Laura; Federazione italiana delle Associazioni di Volontariato in Oncologia (FAVO)<br/> De Lorenzo, Francesco; Associazione Italiana Malati di Cancro (AIMAC); European Cancer Patient Coalition (ECPC)<br/> Iannelli, Elisabetta; F.A.V.O. Italian Federation of Volunteer-Based Cancer Organizations<br/> Tracò, Francesca; Associazione Italiana Malati di Cancro (AIMAC)<br/> Gitto, Lara; Università degli Studi di Messina, Dipartimento di Economia<br/> Jommi, Claudio; Università Bocconi<br/> Vaccaro, Concetta Maria; Censis - Centro Studi Investimenti Sociali, Area Welfare e Salute<br/> Barberio, Daniela; Istituto Nazionale Tumori IRCCS Fondazione Pascale, Struttura Semplice Dipartimentale di Psiconcologia Clinica<br/> Cinieri, Saverio; Ospedale Perrino, Oncologia<br/> Porta, Camillo; Fondazione IRCCS Policlinico San Matteo<br/> Del Mastro, Lucia; Ospedale Policlinico San Martino Istituto di Ricovero e Cura a Carattere Scientifico per l'Oncologia, Dipartimento di Medicina Interna e Medicina Specialistica; Università di Genova, Dipartimento di Medicina Interna e Medicina Specialistica<br/> Zagonel, Vittorina; Istituto Oncologico Veneto Istituto di Ricovero e Cura a Carattere Scientifico<br/> Cogoni, Alessio Aligi; AOU di Sassari, Unità operativa complessa di Oncologia Medica<br/> Bordonaro, Roberto; Azienda Ospedaliera di Rilievo Nazionale e di Alta Specializzazione Garibaldi Ospedale Garibaldi-Nesima, Oncologia<br/> Gimigliano, Anna; Istituto Nazionale Tumori IRCCS Fondazione Pascale, Clinical Trials Unit</p> |

1  
2  
3  
4  
5  
6  
7  
8  
9  
10  
11  
12  
13  
14  
15  
16  
17  
18  
19  
20  
21  
22  
23  
24  
25  
26  
27  
28  
29  
30  
31  
32  
33  
34  
35  
36  
37  
38  
39  
40  
41  
42  
43  
44  
45  
46  
47  
48  
49  
50  
51  
52  
53  
54  
55  
56  
57  
58  
59  
60

|                  |                                                                                                                                                                                                                                                                                                                                                                                                    |
|------------------|----------------------------------------------------------------------------------------------------------------------------------------------------------------------------------------------------------------------------------------------------------------------------------------------------------------------------------------------------------------------------------------------------|
|                  | <p>Piccirillo, Maria Carmela; Istituto Nazionale Tumori IRCCS Fondazione Pascale, Clinical Trials Unit<br/>         Guizzaro, Lorenzo; Università degli Studi della Campania Luigi Vanvitelli Gallo, Ciro; Università degli Studi della Campania Luigi Vanvitelli, Statistica Medica<br/>         Perrone, Francesco; Istituto Nazionale Tumori IRCCS Fondazione Pascale, Clinical Trials Unit</p> |
| <p>Keywords:</p> | <p>Health economics &lt; HEALTH SERVICES ADMINISTRATION &amp; MANAGEMENT, ONCOLOGY, QUALITATIVE RESEARCH</p>                                                                                                                                                                                                                                                                                       |
|                  |                                                                                                                                                                                                                                                                                                                                                                                                    |

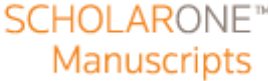

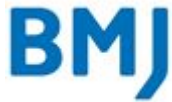

I, the Submitting Author has the right to grant and does grant on behalf of all authors of the Work (as defined in the below author licence), an exclusive licence and/or a non-exclusive licence for contributions from authors who are: i) UK Crown employees; ii) where BMJ has agreed a CC-BY licence shall apply, and/or iii) in accordance with the terms applicable for US Federal Government officers or employees acting as part of their official duties; on a worldwide, perpetual, irrevocable, royalty-free basis to BMJ Publishing Group Ltd ("BMJ") its licensees and where the relevant Journal is co-owned by BMJ to the co-owners of the Journal, to publish the Work in this journal and any other BMJ products and to exploit all rights, as set out in our [licence](#).

The Submitting Author accepts and understands that any supply made under these terms is made by BMJ to the Submitting Author unless you are acting as an employee on behalf of your employer or a postgraduate student of an affiliated institution which is paying any applicable article publishing charge ("APC") for Open Access articles. Where the Submitting Author wishes to make the Work available on an Open Access basis (and intends to pay the relevant APC), the terms of reuse of such Open Access shall be governed by a Creative Commons licence – details of these licences and which [Creative Commons](#) licence will apply to this Work are set out in our licence referred to above.

Other than as permitted in any relevant BMJ Author's Self Archiving Policies, I confirm this Work has not been accepted for publication elsewhere, is not being considered for publication elsewhere and does not duplicate material already published. I confirm all authors consent to publication of this Work and authorise the granting of this licence.

## Development of PROFFIT, a patient-reported instrument for measuring financial toxicity of cancer within a public healthcare system

Silvia Riva<sup>1,2</sup>, Laura Arenare<sup>3</sup>, Massimo Di Maio<sup>4</sup>, Fabio Efficace<sup>5</sup>, Vincenzo Montesarchio<sup>6</sup>, Luciano Frontini<sup>7</sup>, Diana Giannarelli<sup>8</sup>, Jane Bryce<sup>3,9,10</sup>, Laura Del Campo<sup>11</sup>, Francesco De Lorenzo<sup>12</sup>, Elisabetta Iannelli<sup>13</sup>, Francesca Tracclò<sup>13</sup>, Lara Gitto<sup>14</sup>, Claudio Jommi<sup>15</sup>, Concetta Maria Vaccaro<sup>16</sup>, Daniela Barberio<sup>17</sup>, Saverio Cinieri<sup>18</sup>, Camillo Porta<sup>19a</sup>, Lucia Del Mastro<sup>20,21</sup>, Vittorina Zagonel<sup>22</sup>, Alessio Aligi Cogoni<sup>23</sup>, Roberto Bordonaro<sup>24</sup>, Anna Gimigliano<sup>3</sup>, Maria Carmela Piccirillo<sup>3</sup>, Lorenzo Guizzaro<sup>25</sup>, Ciro Gallo<sup>25\*</sup>, Francesco Perrone<sup>3\*</sup>

<sup>1</sup> St Mary's University, Twickenham, London, UK

<sup>2</sup> Fondazione IRCCS Ca' Granda Ospedale Maggiore Policlinico, University Hospital of Milan, Italy

<sup>3</sup> Unità Sperimentazioni Cliniche, Istituto Nazionale per lo Studio e la Cura dei Tumori, IRCCS, Fondazione G.Pascale, Napoli, Italy

<sup>4</sup> Dipartimento di Oncologia, Università di Torino, AO Ordine Mauriziano, Torino, Italy

<sup>5</sup> Gruppo Italiano per le Malattie Ematologiche dell'Adulto (GIMEMA) Health Outcomes Research Unit, Roma, Italy

<sup>6</sup> Azienda Ospedaliera Specialistica dei Colli, Napoli, Italy

<sup>7</sup> Federation of Italian Cooperative Oncology Groups (FICOG), Milano, Italy

<sup>8</sup> Unità di Biostatistica, Istituto Nazionale per lo Studio e la Cura dei Tumori Regina Elena, IRCCS, Roma, Italy

<sup>9</sup> Dipartimento di Biomedicina e Prevenzione, Università degli Studi di Roma "Tor Vergata", Roma, Italy

<sup>10</sup> Ascension St. John Clinical Research Institute, Tulsa, USA

<sup>11</sup> Federazione italiana delle Associazioni di Volontariato in Oncologia (FAVO), Rome, Italy

<sup>12</sup> European Cancer Patient Coalition (ECPC), Brussels, Belgium

<sup>13</sup> Associazione Italiana Malati di Cancro (AIMAC), Roma, Italy

<sup>14</sup> Dipartimento di Economia, Università degli Studi di Messina, Italy

<sup>15</sup> CER GAS (Centre for Health and Social Care Management), SDA Bocconi School of Management, Milano, Italy

<sup>16</sup> Area Welfare e Salute, Centro Studi Investimenti Sociali (CENSIS), Roma, Italy

<sup>17</sup> Struttura Semplice Dipartimentale di Psiconcologia Clinica, Istituto Nazionale per lo Studio e la Cura dei Tumori, IRCCS, Fondazione G.Pascale, Napoli, Italy

<sup>18</sup> Unità Operativa Complessa di Oncologia Medica, Ospedale Perrino, Brindisi, Italy

<sup>19</sup> Struttura Complessa di Oncologia Medica, Fondazione IRCCS Policlinico San Matteo, Pavia, Italy

<sup>20</sup> UO Breast Unit, IRCCS Ospedale Policlinico San Martino, Genova, Italy

<sup>21</sup> Dipartimento di Medicina Interna e Medicina Specialistica (DIMI), Università di Genova, Italy

<sup>22</sup> U.O.C. Oncologia 1, Istituto Oncologico Veneto, IOV, IRCCS Padova, Italy

<sup>23</sup> Unità operativa complessa di Oncologia Medica - AOU di Sassari, Italy

<sup>24</sup> Struttura Complessa di Oncologia Medica, ARNAS Garibaldi-Nesima, Catania, Italy

<sup>25</sup> Statistica Medica, Università degli Studi della Campania "Luigi Vanvitelli", Napoli, Italy.

\* co-last authors

<sup>a</sup> present address: Dipartimento di Scienze Biomediche ed Oncologia Umana, Università degli Studi di Bari 'A. Moro' e Azienda Ospedaliero-Universitaria Consorziale Policlinico di Bari, Bari, Italy.

**Corresponding author**

Dr. Francesco Perrone  
Unità Sperimentazioni Cliniche  
Istituto Nazionale per lo Studio e la Cura dei Tumori,  
IRCCS Fondazione Pascale, Napoli  
Via Mariano Semmola  
80131 Napoli, Italy  
[f.perrone@istitutotumori.na.it](mailto:f.perrone@istitutotumori.na.it)  
fax +390817702938  
phone +390815903571

**Word count:** 2785**Key words:** Financial toxicity, Cancer, Patient Reported Outcomes, Health Economics

Peer review only

1  
2  
3 **Abstract** (290 words)  
4

5 **Objectives:** To measure and explain financial toxicity (FT) of cancer in Italy, where a public  
6 healthcare system exists and cancer patients are not expected (or only marginally) to pay  
7 out-of-pocket for health care.  
8  
9

10  
11  
12 **Setting:** Ten clinical oncological centres, distributed across Italian macroregions (North,  
13 Centre, South and Islands), including hospitals, university hospitals and national research  
14 institutes.  
15  
16  
17

18  
19 **Participants:** From Oct 8<sup>th</sup>, 2019 to Dec 11<sup>th</sup>, 2019, 184 patients, aged 18 or more, who  
20 were receiving or had received within the previous three months active anticancer treatment  
21 were enrolled, 108 (59%) females and 76 (41%) males.  
22  
23  
24

25  
26 **Intervention:** A 30-item pre-final questionnaire, previously developed within the qualitative  
27 tasks of the project, was administered, either electronically (n=115) or by papersheet (n=69).  
28  
29

30  
31 **Primary and secondary outcome measures:** According to the protocol and the  
32 International Society for Pharmacoeconomics and Outcomes Research (ISPOR)  
33 methodology, the final questionnaire was developed by mean of explanatory factor analysis  
34 and tested for reliability, internal consistency (Cronbach's  $\alpha$  test and item-total correlation)  
35 and stability of measurements over time (test-retest reliability by intra-class correlation  
36 coefficient and weighted Cohen's Kappa coefficient).  
37  
38  
39  
40  
41  
42  
43

44  
45 **Results:** After exploratory factor analysis, a scale measuring FT (FT-scale) was identified,  
46 made by 7 items dealing with outcomes of FT. The Cronbach alpha coefficient for the FT-  
47 scale was 0.87 and the item-total correlation coefficients ranged from 0.53 to 0.74. Further,  
48 9 single items representing possible determinants of FT were also retained in the final  
49 instrument. Test-retest analysis revealed a good internal validity of the 16 items retained in  
50 the final questionnaire.  
51  
52  
53  
54  
55  
56  
57  
58  
59  
60

1  
2  
3 **Conclusions:** The PROFFIT (Patient Reported Outcome for Fighting Financial Toxicity)  
4  
5 instrument consists of 16 items and is the first reported instrument to assess FT of cancer  
6  
7 developed in a country with a fully public healthcare system.  
8  
9

10 **Trial registration:** clinicaltrials.gov NCT 03473379.  
11  
12  
13  
14  
15  
16  
17

## 18 **ARTICLE SUMMARY**

### 21 **Strengths and limitations of this study**

- 25 • Previous research data, using a generic quality of life instrument, supported that  
26 financial problems do affect the outcome of cancer patients in Italy, notwithstanding  
27 the Italian healthcare system is based on universal coverage and patients do not  
28 pay to access cancer treatment.  
29
- 30 • No tool for measuring and understanding financial toxicity of cancer had been ever  
31 produced in the context of a public healthcare system with universal coverage.  
32
- 33 • The development of PROFFIT was done according to a widely accepted  
34 methodology for the production of patient reported outcome measures.  
35
- 36 • Correlation of PROFFIT with known anchors (quality of life tools, performance  
37 status) and the responsiveness of the instrument over the course of the disease are  
38 being studied.  
39
- 40 • PROFFIT might be of interest for other countries where a public healthcare system  
41 exists; however, cross-cultural adaptation and linguistic validation should be  
42 performed before it be used outside Italy.  
43  
44  
45  
46  
47  
48  
49  
50  
51  
52  
53  
54  
55  
56  
57  
58  
59  
60



## INTRODUCTION

Financial toxicity (FT) following cancer diagnosis and treatment is an increasingly recognized problem worldwide. While initial reports came from the United States, recent data suggest its importance in many other countries with different healthcare systems, like for example Japan, Nepal, Canada and Italy. [1-7] In 2016, we reported financial difficulties among Italian cancer patients enrolled in clinical trials, and their association with worse quality of life and overall survival. [5] Using individual data from 16 randomized trials, we found that patients reporting some degree of financial burden at baseline had a higher chance of worsening global quality of life (QoL) response after treatment, and that patients, who developed financial toxicity during treatment, had a statistically significant shorter survival. [5]

Therefore, in 2018, we started the multicentre PROFFIT (Patient Reported Outcome for Fighting Financial Toxicity of cancer) project to develop a tool for measuring and understanding financial toxicity of cancer that would be sensitive to dimensions of a universal healthcare system. The PROFFIT protocol and the early qualitative findings of the project were reported elsewhere. [8, 9] We herein report the quantitative analysis of the 30 items resulting from the early phases of the project and the final questionnaire.

## METHODS

The study protocol was approved by the independent ethical review board of the institutions enrolling patients and is registered on [clinicaltrials.gov](https://clinicaltrials.gov) NCT03473379. Overall, the project was performed according to International Society for Pharmacoeconomics and Outcomes Research (ISPOR) guidelines. [10, 11]

### Patient sample and data acquisition

To be included patients had to fulfil the following enrolment criteria: i) adult patients (>18 years), ii) histologically or cytologically confirmed diagnosis of any type of solid cancer or haematological malignancy, iii) medical treatment (chemotherapy, target agents, immunotherapy, hormonal treatment, radiotherapy or combinations of such therapies) ongoing or terminated within the previous three months. The questionnaires could be administered either as paper document or as a tablet digital version, according to centre choice. Written informed consent was required. The minimum sample size was calculated to assess the test-retest reliability. With an acceptable level of intraclass correlation coefficient (ICC) equal to 0.70 and an expected ICC of 0.80, a one-sided alpha 0.05, 80% power, at least 118 patients had to be enrolled.

### Instrument

The first two tasks of the PROFFIT project, concept elicitation and item generation, have been previously described. [9] Briefly, as for concept elicitation, an extensive list of topics related to FT was derived from literature review, expert survey and focus groups. Ten FT domains (medical care, domestic economy, emotion, family, job, health workers, welfare

1  
2  
3 state, free time and transportation) were described by 156 topics, that reduced to 55 items  
4  
5 after correction for redundancy, and to 30 items after importance analysis. These items were  
6  
7 tested as for comprehensibility, recall, judgement and response in 45 cognitive interviews  
8  
9 and represented the pre-final instrument.  
10

11  
12 Two groups of items were identified by the study steering committee: (1) *outcome* items  
13  
14 (n=10), i.e. indicators, that reflect the level of the supposed latent FT and that do not alter or  
15  
16 influence the latent construct they measure, and (2) *determinant* items (n= 20), i.e. causal  
17  
18 indicators, that are considered to affect FT and that may change the latent variable. [12]  
19  
20 Separate analyses were performed in the outcome and determinant groups.  
21  
22  
23  
24  
25

## 26 **Statistical analysis**

27  
28 To reduce possible redundancy, the between-item correlation matrix was preliminarily  
29  
30 estimated by pairwise Spearman rank correlation coefficients ( $r_s$ ), because of the ordinal  
31  
32 nature of items; cut-off was set equal to 0.65, and for each pair of items with  $r_s > 0.65$  the  
33  
34 item with the greater score in the previously published importance analysis was retained. [9]  
35  
36 Exploratory factor analysis (EFA) was used to discover the presence of multi-item scales  
37  
38 and the distribution of the items consistent with the theoretical framework of FT. [13] To  
39  
40 **extract factors** we used the Principal Axis Factor (PAF) analysis with Varimax rotation and  
41  
42 Kaiser normalization. To determine the number of scale factors, we relied on the Kaiser  
43  
44 criterion to select factors with eigenvalue  $> 1$ , the Scree test to depict the percentage of total  
45  
46 variance explained by the factors extracted, and the interpretability of the factor solution.  
47  
48 PAF assumptions were assessed by Bartlett sphericity test and Kaiser-Meyer-Olkin (KMO)  
49  
50 measure of sampling adequacy. [14]  
51  
52  
53  
54 No missing data imputation was initially planned, but we found 37% of information was  
55  
56 missing for the five items related to job, from patients who declared themselves retired or  
57  
58 jobless (i.e. househusbands, housewives or individuals in search of employment).  
59  
60

1  
2  
3 Consistently we performed the analyses involving job-related items both in the sample of  
4 patients with complete valid information (hereby defined as “restricted sample”), and in the  
5 whole sample (hereby defined as “full sample”), by imputing, for each subject, the missing  
6 values with the average score of the items answered.  
7  
8  
9  
10

11  
12 The face validity of the resulting scale was examined, both in terms of the scale global  
13 meaning and in terms of the appropriateness of each individual item to that scale. Internal  
14 consistency, i.e. within-scale between-items correlations, was assessed by Cronbach’s  
15 alpha correlation coefficient, assuming as acceptable a value >0.70. Relationships between  
16 each individual item  $x_i$  and the total score of the scale to which they were assumed to belong  
17 were assessed by Spearman rank correlation coefficient with correction for overlap, i.e. by  
18 omitting  $x_i$  from the total score. To evaluate stability of measurements over time, the  
19 questionnaire was to be administered again after one week and the test–retest reliability  
20 was assessed by intra-class correlation coefficient (ICC) and weighted Cohen’s Kappa  
21 coefficient. We considered a minimally acceptable level of reliability equal to 0.70 and an  
22 expected ICC of 0.80.  
23  
24  
25  
26  
27  
28  
29  
30  
31  
32  
33  
34  
35  
36

37 Descriptive statistics were used to characterize the study sample and their mean scores  
38 answers. The data met all the necessary assumptions for this factor analysis. Statistical  
39 analyses were performed with SPSS version 25.0 (SPSS; Chicago, IL, USA) and with Stata  
40 14 (Stata, College Station, TX, USA)  
41  
42  
43  
44  
45  
46  
47  
48

### 49 **English translation**

50  
51 To allow international comprehension of the final PROFFIT questionnaire, an English  
52 translation was done according to methodology proposed by Wild et al.[15] First, a  
53 translation committee was established including five members of the Steering Committee  
54 (FP, SR, CG, MDM, FE), two English mother-tongue translators and two Italian mother-  
55 tongue translators. Second, the two English translators independently translated the tool  
56  
57  
58  
59  
60

1  
2  
3 into English producing two forward translations (T1 and T2) that were collected and  
4  
5 subsequently discussed in a meeting where the agreement on the English version was  
6  
7 achieved. Third, the two Italian translators (unaware of the original Italian version)  
8  
9 independently back-translated the English version into Italian; their translations were  
10  
11 collected and discussed in a meeting including the whole translation committee. During such  
12  
13 meeting the final English translation was generated and approved by the Steering  
14  
15 Committee. It is important to underline that the English translation has to be considered just  
16  
17 to allow comprehension by non-Italian readers because it has not been cross-culturally  
18  
19 adapted and validated within a population of English native patients.  
20  
21  
22  
23  
24  
25  
26  
27  
28  
29  
30  
31  
32  
33  
34  
35  
36  
37  
38  
39  
40  
41  
42  
43  
44  
45  
46  
47  
48  
49  
50  
51  
52  
53  
54  
55  
56  
57  
58  
59  
60

## RESULTS

From Oct 8<sup>th</sup>, 2019 to Dec 11<sup>th</sup>, 2019, 185 patients were enrolled at 10 participating centres; one patient was excluded because the baseline questionnaire was missing due to a technical problem with web connection of the tablet application. Questionnaires were administered as paper document in 4 centres (69 patients) and as digital tablet application in 6 centres (115 patients). Job-related items had a 37% rate of missing responses; all the remaining items were answered in 100% of the cases, leading to the full sample of 184 patients and the restricted sample of 116 patients.

Demographic and clinical characteristics of the 184 patients are shown in **Table 1**. Median age was 59 years (range 29-83) and participants were predominantly female. More than half of the patients had a high level of schooling (high school or degree), and around 70% were married. In terms of clinical characteristics, the great majority of patients had a previous surgery for cancer, and the most common treatment was chemotherapy. As expected, in the restricted sample, patients were younger, with a higher level of education and more frequently actively working.

At the preliminary between-item correlation analysis in the restricted sample without missing imputation for job items (116 patients), six items were excluded because  $r_s$  was greater than 0.65, leading to 9 outcome and 15 determinant items for subsequent analyses.

PAF assumptions on the 9 outcome items were met with very good parameters (KMO = 0.82 and Bartlett's test of sphericity,  $p$ -value <.001), and two items were excluded because of low communality. Thus, final PAF was performed on 7 outcome items. In the restricted sample, two initial eigenvalues >1 explained 66% of the total variance: both were expression of financial burden, but the second one was mostly related to job. All items had factor loadings greater than 0.40. In the full sample (KMO = 0.87 and Bartlett's test of sphericity,  $p$ -value <.001), with missing imputation for the job-related item, all the 7 items were related to one factor explaining 57% of the total variance; factor loadings and communalities are

1  
2  
3 reported in **Table S1**, for both the restricted and the full sample. Thus, the PROFFIT FT-  
4 scale includes 7 outcome items. The Cronbach alpha coefficient for the PROFFIT FT-scale  
5 was 0.85 in the restricted sample and 0.87 in the full sample, indicating that the correlation  
6 between the items and the score is consistently reliable. Correlations between each single  
7 item of the FT-scale and the total score (after removal of the single item), ranged from 0.37  
8 to 0.73 in the restricted sample, and from 0.53 to 0.74 in the full sample (**Table S2**).

9  
10 Similarly, assumptions on the 15 determinants items were met with satisfactory parameters  
11 (KMO = 0.68 and Bartlett's test of sphericity, p-value <0.001). PAF on the determinant items  
12 eliminated 6 items because of low communality and showed that the other 9 items were only  
13 mildly related, without a clear definition of any factor, hence they were retained as single  
14 items.

15  
16 Therefore, the final PROFFIT instrument includes the FT-scale (consisting of 7 items) and  
17 9 single items assessing possible determinants of FT. In **Table 2**, both the Italian items and  
18 the English translation are reported. The postulated causal structure for PROFFIT is  
19 reported in Figure 1.

20  
21 Due to cyclic structure of ongoing anticancer treatment, most retest questionnaires were  
22 actually administered later than the planned one-week interval from the first assessment. In  
23 principle, such deviation might reduce Therefore, we excluded from the test-retest analysis  
24 all questionnaires administered more than 35 days (n=52) after the first ones because of the  
25 possibility that more than one cycle of treatment could had been given during the interval.  
26 Within 132 cases of the full sample, median time between test and retest was 21 days; all  
27 ICCs and Cohen's weighted K coefficients were good, ranging from 0.52 and 0.79; ICC and  
28 weighted K were 0.79 and 0.81, respectively, for the job-related item, retested in 80 patients  
29 (**Table S3**).

30  
31  
32  
33  
34  
35  
36  
37  
38  
39  
40  
41  
42  
43  
44  
45  
46  
47  
48  
49  
50  
51  
52  
53  
54  
55  
56  
57  
58  
59  
60

## DISCUSSION

Financial toxicity has been initially described in the United States as a factor negatively affecting cancer patients during their journey, in several ways.[7] Particularly, both QoL and survival have been reported to be worse among patients facing with financial hardships and bankruptcy. [16, 17] This might be not surprising given that the US health system prevalently requires out of pocket co-payment of medical expenses, and that the cost of cancer treatment has been steadily increasing. [18]

On the contrary, we were surprised when we earlier observed that financial problems (measured by the EORTC QLQ-C30 questionnaire) were associated with worse QoL and shorter survival also among Italian cancer patients, who actually live in a country with a public healthcare system where no co-payment is required for healthcare costs.[5] However, the extreme simplicity of the single-item question (item #28) of the EORTC QLQ-C30 questionnaire did not allow further understanding of the determinants of the phenomenon. Therefore, we decided to develop an instrument to more thoroughly describe financial toxicity and to explore potential determinants, within the Italian public health system, where the dynamics should be different as compared with a prevalently private health system like the US one. [19, 20] Here we report this instrument, PROFFIT, that, to the best of our knowledge, is the first one fully published from an European country, and that is candidate to be cross-culturally adapted and validated in other countries with health systems similar to the Italian public health system.

The need to have a specific instrument to measure financial toxicity has been previously addressed in the United States by the Investigators who produced and validated the Comprehensive Score for Financial Toxicity (COST) instrument. [21, 22]

The methodology applied to develop PROFFIT is similar to that applied for the COST development, as both followed the ISPOR guidelines. [10, 11] Nevertheless, the content of the two instruments differ, according to the three domains (psychological response, material



1  
2  
3 conditions and coping behaviours) proposed by Altice et al. to describe financial hardship.  
4  
5 [23] Indeed, while 8 of the 11 items of the COST version 1 questionnaire fall into the “affect”  
6  
7 theme and the psychological response domain, 11 out of the 16 PROFFIT items pertain to  
8  
9 the material conditions domain. This marked difference supports that the sociocultural  
10  
11 context and the health and social care systems may significantly affect the causes and the  
12  
13 consequences of financial problems of cancer patients. [19, 20] Therefore, specific  
14  
15 instruments should be used within different contexts, and an analysis of differences between  
16  
17 social and health systems should be done before choosing which instrument might be more  
18  
19 appropriate for measuring financial toxicity. An instrument like PROFFIT, including several  
20  
21 items related to determinants of financial toxicity, may be helpful to identify potential targets  
22  
23 for action; and such targets, indeed, might be not immediately identified within a public  
24  
25 health system that should cover all the needs of cancer patients. Namely, items related to  
26  
27 transportation costs, to medical expenses not adequately covered by the public health  
28  
29 system and the items pertaining to the quality of medical and non-medical staff and the  
30  
31 communication among them clearly indicate some roadmaps of intervention that should be  
32  
33 addressed within projects of education, organisation and financial support of various  
34  
35 compartments of the welfare system.  
36  
37  
38  
39  
40

41  
42 While developing PROFFIT, a complex matter derived from management of items related  
43  
44 to job activities. Indeed, around one third of patients did not respond to these items. For this  
45  
46 reason, we approached the analysis using both (1) a restricted sample, the subgroup  
47  
48 including only subjects answering all items, and (2) the full sample, involving all subjects,  
49  
50 where missing responses were imputed based on responses to the other valid items. The  
51  
52 restricted sample might be most sensitive to financial distress deriving from job loss or  
53  
54 reduction but would not be representative of the real-world cancer patient population due to  
55  
56 the selective exclusion of older patients, and generalizability would be reduced. On the  
57  
58 contrary, the full sample, that is representative of the general cancer patient population might  
59  
60

1  
2  
3 be less sensitive to relevance of job problems. We will investigate this topic more deeply in  
4  
5 the near future within further validation studies.  
6

7  
8 Notwithstanding a longer than planned interval between test and retest questionnaire  
9  
10 administration, that might in principle reduce reproducibility, a good reliability was observed  
11  
12 with all the items.  
13

14  
15 We decided not to define a fixed temporal frame to which refer the response, differently from  
16  
17 what is frequently done in patient reported outcomes. The decision was prompted by the  
18  
19 consideration that in the final PROFFIT questionnaires, some of the items represent patient-  
20  
21 reported experiences, rather than pure outcomes, and might derive from the accumulation  
22  
23 of problems over the time. This should make the instrument more sensitive for cross-  
24  
25 sectional studies, where it is not strictly important to define whether responses refer to a  
26  
27 precise time window. Of course, when PROFFIT will be used as a tool within prospective  
28  
29 trials comparing different treatment strategies, a fixed time window should be indicated in  
30  
31 order to capture the period of interest.  
32  
33

34  
35 We are performing further prospective analysis testing the correlation of PROFFIT with  
36  
37 known anchors (quality of life tools, performance status) and the responsiveness of the  
38  
39 instrument over the course of the disease. In the meanwhile, the questionnaire is available  
40  
41 for Italian investigators wishing to use it and for international Investigators wishing to cross-  
42  
43 validate it into different languages and countries. No fee will be required for using the  
44  
45 questionnaire for purely academic studies, but registration of the protocols will be required  
46  
47 and written agreements with the National Cancer Institute of Naples, Italy, will be requested.  
48  
49 In conclusion, financial toxicity is a major problem in oncology also within an universal  
50  
51 healthcare system, hence the availability of specific and validated instruments is crucial to  
52  
53 better understand its causes and its relationship with different aspects of cancer disease.  
54  
55 Ultimately, data generated via this newly developed tool will provide insights on how to  
56  
57  
58  
59  
60

1  
2  
3  
4  
5  
6  
7  
8  
9  
10  
11  
12  
13  
14  
15  
16  
17  
18  
19  
20  
21  
22  
23  
24  
25  
26  
27  
28  
29  
30  
31  
32  
33  
34  
35  
36  
37  
38  
39  
40  
41  
42  
43  
44  
45  
46  
47  
48  
49  
50  
51  
52  
53  
54  
55  
56  
57  
58  
59  
60

collaborate in the fight against financial toxicity, and hopefully improve the outcomes of cancer patients.

For peer review only

**Table 1. Characteristics of participating patients**

|                                                             | Full sample<br>N = 184 | Restricted sample<br>N = 116 |
|-------------------------------------------------------------|------------------------|------------------------------|
| <b>Gender, n (%)</b>                                        |                        |                              |
| Female                                                      | 108 (58,7%)            | 63 (54,3%)                   |
| Male                                                        | 76 (41,3%)             | 53 (45,7%)                   |
| <b>Age, median (range)</b>                                  | 59 (29-82)             | 55 (29-74)                   |
| <b>Age category, n (%)</b>                                  |                        |                              |
| ≤60                                                         | 94 (51,1%)             | 72 (62,1%)                   |
| >60                                                         | 90 (48,9%)             | 44 (37,9%)                   |
| <b>Region of the participating institution, n (%)</b>       |                        |                              |
| North                                                       | 71 (38,6%)             | 46 (39,7%)                   |
| Center                                                      | 15 (8,2%)              | 9 (7,8%)                     |
| South                                                       | 71 (38,6%)             | 43 (37,1%)                   |
| Islands                                                     | 27 (14,7%)             | 18 (15,5%)                   |
| <b>Education level, n (%)</b>                               |                        |                              |
| Elementary school                                           | 23 (12,5%)             | 8 (6,9%)                     |
| Middle school                                               | 57 (31,0%)             | 33 (28,4%)                   |
| High school/degree                                          | 104 (56,5%)            | 75 (64,7%)                   |
| <b>Marital status, n (%)</b>                                |                        |                              |
| Married                                                     | 132 (71,7%)            | 82 (70,7%)                   |
| Other                                                       | 52 (28,3%)             | 34 (29,3%)                   |
| <b>With dependent family members, n (%)</b>                 |                        |                              |
| No                                                          | 107 (58,2%)            | 60 (51,7%)                   |
| Yes                                                         | 77 (41,8%)             | 56 (48,3%)                   |
| <b>Family members with cancer or chronic disease, n (%)</b> |                        |                              |
| No                                                          | 82 (44,6%)             | 52 (44,8%)                   |
| Yes                                                         | 102 (55,4%)            | 64 (55,2%)                   |
| <b>Working status, n (%)</b>                                |                        |                              |
| Working                                                     | 84 (45,7%)             | 82 (70,7%)                   |
| Not working                                                 | 100 (54,3%)            | 34 (29,3%)                   |
| <b>Distance (km) from the hospital, median (range)</b>      | 20 (1-430)             | 25 (1-286)                   |
| <b>Previous treatment</b>                                   |                        |                              |
| Surgery                                                     | 129 (70,1%)            | 81 (69,8%)                   |
| Chemotherapy                                                | 157 (85,3%)            | 94 (81,0%)                   |
| Target-based agents                                         | 55 (29,9%)             | 37 (31,9%)                   |
| Immunotherapy                                               | 38 (20,7%)             | 28 (24,1%)                   |
| Hormonal therapy                                            | 31 (16,8%)             | 18 (15,5%)                   |
| Radiotherapy                                                | 43 (23,4%)             | 28 (24,1%)                   |
| <b>Last/ongoing treatment</b>                               |                        |                              |
| Chemotherapy                                                | 135 (73,4%)            | 79 (68,1%)                   |
| Target-based agents                                         | 18 (9,8%)              | 13 (11,2%)                   |
| Immunotherapy                                               | 25 (13,6%)             | 19 (16,4%)                   |
| Hormonal therapy                                            | 5 (2,7%)               | 4 (3,4%)                     |
| Radiotherapy                                                | 1 (0,5%)               | 1 (0,9%)                     |
| <b>Primary tumour site</b>                                  |                        |                              |
| Breast                                                      | 59 (32,1%)             | 36 (31,0%)                   |
| Lower_GI                                                    | 51 (27,7%)             | 24 (20,7%)                   |
| Genito-urinary                                              | 34 (18,5%)             | 27 (23,3%)                   |
| Thoracic                                                    | 18 (9,8%)              | 13 (11,2%)                   |
| Upper_GI                                                    | 13 (7,1%)              | 10 (8,6%)                    |
| Other                                                       | 9 (4,9%)               | 6 (5,2%)                     |

**Table 2. Final PROFFIT instrument**

| Item type and number                    | Italian version                                                                                                              | English translation (for comprehension only)                                                                                                         |
|-----------------------------------------|------------------------------------------------------------------------------------------------------------------------------|------------------------------------------------------------------------------------------------------------------------------------------------------|
| <b>Outcome items (FT-scale)</b>         |                                                                                                                              |                                                                                                                                                      |
| 1.                                      | Sono in grado di sostenere le mie spese mensili senza difficoltà (ad esempio per affitto, elettricità, telefono...)          | I can afford my monthly expenses without difficulty (for example rent, electricity, phone...)                                                        |
| 2.                                      | La mia malattia ha ridotto le mie disponibilità economiche                                                                   | My illness has reduced my financial resources                                                                                                        |
| 3.                                      | Sono preoccupato dei problemi economici che potrei avere in futuro a causa della malattia                                    | I am concerned by the economic problems I may have in the future due to my illness                                                                   |
| 4.                                      | La mia condizione economica incide sulle mie possibilità di curarmi                                                          | My economic situation affects the possibility of receiving medical care                                                                              |
| 5.                                      | Ho ridotto le spese per attività ricreative come vacanze, ristoranti o spettacoli per affrontare le spese della mia malattia | I have reduced my spending on leisure activities such as holidays, restaurants or entertainment in order to cope with expenses related to my illness |
| 6.                                      | Ho ridotto le spese per acquisti essenziali (ad esempio il cibo) per affrontare le spese per la mia malattia                 | I have reduced spending on essential goods (for example food) in order to cope with expenses related to my illness                                   |
| 7.                                      | Sono preoccupata/o di non riuscire a lavorare a causa della mia malattia                                                     | I am worried that I will not be able to work due to my illness                                                                                       |
| <b>Determinant items (single items)</b> |                                                                                                                              |                                                                                                                                                      |
| 8.                                      | Il Servizio Sanitario Nazionale copre tutti i costi sanitari associati alla mia malattia                                     | The National Health Service covers all health costs related to my illness                                                                            |
| 9.                                      | Ho sostenuto spese per una o più visite private per la mia malattia                                                          | I have paid for one or more private medical examinations for my illness                                                                              |
| 10.                                     | Ho sostenuto spese per farmaci supplementari o integratori per la mia malattia                                               | I have paid for additional medicines or supplements related to my illness                                                                            |
| 11.                                     | Devo sostenere spese per cure integrative a mio carico (es. fisioterapia, psicoterapia, cure odontoiatriche)                 | I have to pay for additional treatment myself (for example physiotherapy, psychotherapy, dental care)                                                |
| 12.                                     | Il centro di cura è lontano dalla mia abitazione                                                                             | The treatment centre is a long way from where I live                                                                                                 |
| 13.                                     | Ho dovuto sostenere rilevanti costi di trasporto per curarmi                                                                 | I have spent a considerable amount of money on travel for treatment                                                                                  |
| 14.                                     | Il personale sanitario (cioè medici, infermieri, etc.) ha agevolato il percorso di cura                                      | Medical staff (that is doctors, nurses etc.) have been helpful throughout my medical care                                                            |
| 15.                                     | Il personale ospedaliero amministrativo (cioè centro di prenotazione, segreterie, etc.) ha agevolato il percorso di cura     | Staff in hospital administration (that is for booking appointments, secretaries, etc.) have been helpful throughout my medical care                  |
| 16.                                     | C'è stata comunicazione tra i medici e le strutture sanitarie che mi seguono                                                 | Medical staff and medical facilities I attended communicated with each other                                                                         |

## Legend of figure

Figure 1. Postulated causal structure for PROFFIT tool

## Acknowledgments

See appendix.

## Authors contribution

FP obtained funding. SR, JB, CG and FP drafted the protocol. MDM, FE, VM, LF, DG, LDC, FDL, EI, FT, LG, CJ, CMV, and MCP contributed to protocol writing. MDM, VM, DG, DB, SC, CP, LDM, VZ, AAC, RB and FP contributed to patients' enrolment. SR, LA, LG, CG and FP performed statistical analysis and drafted the manuscript. All Authors contributed to the manuscript and approved the final version.

## Data

Data will be made available upon request to the corresponding author.

## Patient and public involvement

The project was informed by patients' thanks to the involvement of patients and representatives of patients' associations in the Steering Committee that oversaw all the phases of the project, including protocol definition, qualitative analysis (previously reported elsewhere) producing the pre-final questionnaire, and final analyses producing the final questionnaire (reported here); they are co-author of this manuscript and of the previous manuscripts dealing with this project (LDC, FDL, EI, FT). They will also contribute in dissemination of the results of the project.

1  
2  
3  
4  
5  
6  
7  
8  
9  
10  
11  
12  
13  
14  
15  
16  
17  
18  
19  
20  
21  
22  
23  
24  
25  
26  
27  
28  
29  
30  
31  
32  
33  
34  
35  
36  
37  
38  
39  
40  
41  
42  
43  
44  
45  
46  
47  
48  
49  
50  
51  
52  
53  
54  
55  
56  
57  
58  
59  
60

## Funding

The project is supported by Fondazione AIRC (Associazione Italiana per la Ricerca sul Cancro), a non-profit Italian charity, IG 2017 Id 20402

For peer review only

## References

1. Ezeife DA, Morganstein BJ, Lau S et al. Financial Burden Among Patients With Lung Cancer in a Publically Funded Health Care System. *Clin Lung Cancer* 2018.
2. Honda K, Gyawali B, Ando M et al. Prospective Survey of Financial Toxicity Measured by the Comprehensive Score for Financial Toxicity in Japanese Patients With Cancer. *J Glob Oncol* 2019; 5: 1-8.
3. Longo CJ, Fitch MI, Banfield L et al. Financial toxicity associated with a cancer diagnosis in publicly funded healthcare countries: a systematic review. *Supportive Care in Cancer* 2020; 28: 4645-4665.
4. Lueckmann SL, Schumann N, Hoffmann L et al. 'It was a big monetary cut'-A qualitative study on financial toxicity analysing patients' experiences with cancer costs in Germany. *Health Soc Care Community* 2020; 28: 771-780.
5. Perrone F, Jommi C, Di Maio M et al. The association of financial difficulties with clinical outcomes in cancer patients: secondary analysis of 16 academic prospective clinical trials conducted in Italy. *Ann Oncol* 2016; 27: 2224-2229.
6. Poudyal BS, Giri S, Tuladhar S et al. A survey in Nepalese patients with acute leukaemia: a starting point for defining financial toxicity of cancer care in low-income and middle-income countries. *The Lancet Haematology* 2020; 7: e638-e639.
7. Zafar SY. Financial Toxicity of Cancer Care: It's Time to Intervene. *J Natl Cancer Inst* 2016; 108.
8. Riva S, Bryce J, De Lorenzo F et al. Development and validation of a patient-reported outcome tool to assess cancer-related financial toxicity in Italy: a protocol. *BMJ Open* 2019; 9: e031485.



- 1  
2  
3 9. Riva S, Efficace F, Di Maio M et al. A qualitative analysis and development of a  
4  
5 conceptual model assessing financial toxicity in cancer patients accessing the universal  
6  
7 healthcare system. *Support Care Cancer* 2020.
- 8  
9  
10 10. Patrick DL, Burke LB, Gwaltney CJ et al. Content validity--establishing and reporting  
11  
12 the evidence in newly developed patient-reported outcomes (PRO) instruments for medical  
13  
14 product evaluation: ISPOR PRO Good Research Practices Task Force report: part 2--  
15  
16 assessing respondent understanding. *Value Health* 2011; 14: 978-988.
- 17  
18  
19 11. Patrick DL, Burke LB, Gwaltney CJ et al. Content validity--establishing and reporting  
20  
21 the evidence in newly developed patient-reported outcomes (PRO) instruments for medical  
22  
23 product evaluation: ISPOR PRO good research practices task force report: part 1--eliciting  
24  
25 concepts for a new PRO instrument. *Value Health* 2011; 14: 967-977.
- 26  
27  
28 12. Fayers PM, Machin D. *Quality of Life: Assessment, Analysis and Interpretation*.2000.
- 29  
30  
31 13. Floyd FJ, Widaman KF. Factor analysis in the development and refinement of clinical  
32  
33 assessment instruments. *Psychological Assessment* 1995; 7: 286-299.
- 34  
35  
36 14. Fabrigar LR, Wegener DT. *Exploratory Factor Analysis*.2012.
- 37  
38  
39 15. Wild D, Grove A, Martin M et al. Principles of Good Practice for the Translation and  
40  
41 Cultural Adaptation Process for Patient-Reported Outcomes (PRO) Measures: report of the  
42  
43 ISPOR Task Force for Translation and Cultural Adaptation. *Value Health* 2005; 8: 94-104.
- 44  
45  
46 16. Lathan CS, Cronin A, Tucker-Seeley R et al. Association of Financial Strain With  
47  
48 Symptom Burden and Quality of Life for Patients With Lung or Colorectal Cancer. *J Clin*  
49  
50 *Oncol* 2016; 34: 1732-1740.
- 51  
52  
53 17. Ramsey SD, Bansal A, Fedorenko CR et al. Financial Insolvency as a Risk Factor for  
54  
55 Early Mortality Among Patients With Cancer. *J Clin Oncol* 2016; 34: 980-986.
- 56  
57  
58 18. Ramsey SD, Lyman GH, Bangs R. Addressing Skyrocketing Cancer Drug Prices  
59  
60 Comes With Tradeoffs: Pick Your Poison. *JAMA Oncology* 2016; 2: 425-426.

- 1  
2  
3 19. Perrone F, Di Maio M, Efficace F et al. Assessing Financial Toxicity in Patients With  
4  
5 Cancer: Moving Away From a One-Size-Fits-All Approach. J Oncol Pract 2019;  
6  
7 JOP1900200.  
8
- 9  
10 20. Rotter J, Spencer JC, Wheeler SB. Financial Toxicity in Advanced and Metastatic  
11  
12 Cancer: Overburdened and Underprepared. J Oncol Pract 2019; JOP1800518.  
13
- 14  
15 21. de Souza JA, Yap BJ, Hlubocky FJ et al. The development of a financial toxicity  
16  
17 patient-reported outcome in cancer: The COST measure. Cancer 2014; 120: 3245-3253.  
18
- 19  
20 22. de Souza JA, Yap BJ, Wroblewski K et al. Measuring financial toxicity as a clinically  
21  
22 relevant patient-reported outcome: The validation of the COmprehensive Score for financial  
23  
24 Toxicity (COST). Cancer 2017; 123: 476-484.  
25
- 26  
27 23. Altice CK, Banegas MP, Tucker-Seeley RD, Yabroff KR. Financial Hardships  
28  
29 Experienced by Cancer Survivors: A Systematic Review. J Natl Cancer Inst 2017; 109.  
30  
31  
32  
33  
34  
35  
36  
37  
38  
39  
40  
41  
42  
43  
44  
45  
46  
47  
48  
49  
50  
51  
52  
53  
54  
55  
56  
57  
58  
59  
60

### Disclosures of conflicts of interest

SR has received personal fees from CSL-Behring and GlaxoSmithKline Foundation.

MDM has received personal fees from Bristol Myers Squibb, Merck Sharp & Dohme, Astra Zeneca, Janssen, Astellas, Pfizer, Eisai, Takeda.

FE has received personal fees from AbbVie, BMS, Amgen, Orsenix, Takeda and research grant (Institution) from Amgen.

VM has received personal fees from Bristol Myers Squibb and Italfarmaco; a member of his family is employee in Bayer.

CJ has received personal fees from Amgen, Astra Zeneca, Biogen, Boehringer Ingelheim, Celgene, Gilead, GSK, Ipsen, Janssen-Cilag, Takeda and Sanofi.

CMV has received personal fees from from Baxter, MSD, Novartis, Sanofi, Sanofi Genzyme.

CP acted as a Speaker and/or Consultant for MSD, BMS, AstraZeneca, Ipsen, Pfizer, Eisai, EUSA, Novartis, Merck, General Electrics and Angelini; furthermore, was an Expert Testimony for Pfizer and EUSA.

LDM has received personal fees from Eli Lilly, Roche, MSD, Novartis, Genomic Health, Pierre Fabre, Pfizer, Seattle Genetics, Daiichi Sankyo, Astra Zeneca, Ipsen, Eisai.

VZ has received personal fees from BMS, MSD, Eisai, Italfarmaco, Roche, Astellas Pharma, Servier, Astra Zeneca, MSD, Janssen, Ipsen and research grant (Institution) from Bayer, Roche, Eli Lilly, Astra Zeneca, BMS, Ipsen, Astellas.

RB reports personal fees from Bayer, Astra Zeneca, Sanofi, Novartis, Amgen, Hoffmann La Roche, Pfizer, Janssen Cilag, Bristol Myers Squibb, Merck.

1  
2  
3 MCP reports personal fees from Daichii Sankyo, personal fees from GSK, personal fees  
4 from MSD, grants from Roche, grants and personal fees from AstraZeneca, non-financial  
5 support from Bayer.  
6  
7  
8

9  
10 FP has received personal fees from Bayer, Ipsen, Astra Zeneca, Bristol Myers Squibb,  
11 Sandoz, Incyte, Celgene, Pierre Fabre, Janssen-Cilag and research grants (Institution)  
12 from Astra Zeneca, Bayer, Roche, Merck, Pfizer, Incyte, Sanofi, BioClin, Tesaro. All the  
13 above disclosures are outside the submitted work.  
14  
15  
16  
17  
18

19  
20 The other Authors have no conflict to disclose.  
21  
22  
23  
24  
25  
26  
27  
28  
29  
30  
31  
32  
33  
34  
35  
36  
37  
38  
39  
40  
41  
42  
43  
44  
45  
46  
47  
48  
49  
50  
51  
52  
53  
54  
55  
56  
57  
58  
59  
60

1  
2  
3  
4  
5  
6  
7  
8  
9  
10  
11  
12  
13  
14  
15  
16  
17  
18  
19  
20  
21  
22  
23  
24  
25  
26  
27  
28  
29  
30  
31  
32  
33  
34  
35  
36  
37  
38  
39  
40  
41  
42  
43  
44  
45  
46  
47

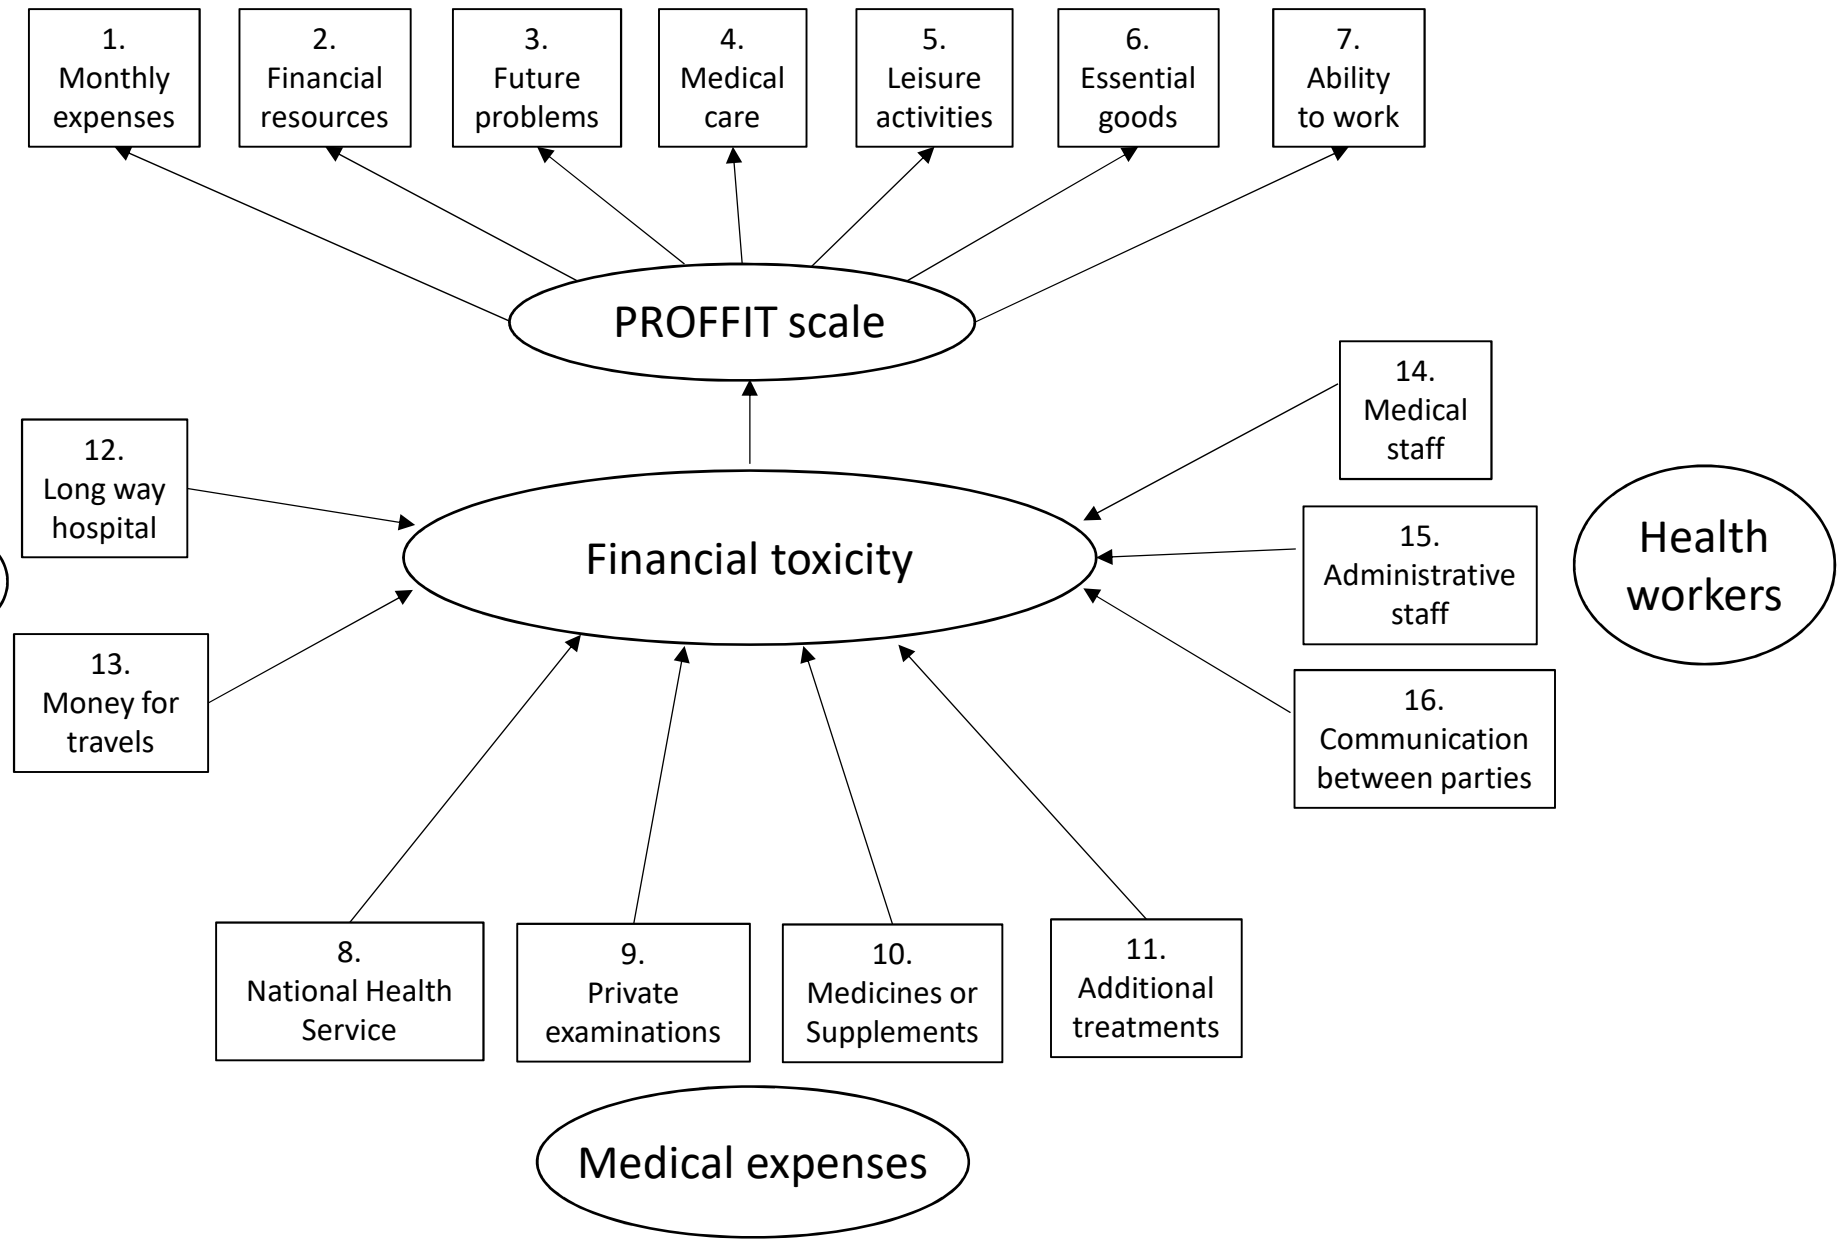

Figure 1.

## Development of PROFFIT, a patient-reported instrument for measuring financial toxicity of cancer within a public healthcare system

### Appendix

The PROFFIT Steering Committee includes: Francesco Perrone, Jane Bryce, Ciro Gallo, Silvia Riva, Fabio Efficace, Francesco De Lorenzo, Elisabetta Iannelli, Laura Del Campo, Francesca Tracò, Massimo Di Maio (also as representative of AIOM – Associazione Italiana di Oncologia Medica), Luciano Frontini, Vincenzo Montesarchio (also as representative of CIPOMO – Collegio Italiano dei Primari di Oncologia Medica Ospedalieri), Diana Giannarelli, Lara Gitto, Claudio Jommi, Concetta Maria Vaccaro.

We acknowledge the contribution of the other personnel working at the Unità Sperimentazioni Cliniche of the Istituto Nazionale per lo Studio e la Cura dei Tumori, IRCCS Fondazione Pascale of Napoli: Adriano Gravina, Clorinda Schettino, Piera Gargiulo, Lucia Sparavigna, Giuliana Canzanella, Fiorella Romano, Valentina Barbato, Manuela Florio, Simona Bevilacqua, Gaetano Buonfanti, Alfonso Savio, Antonia Del Giudice, Teresa Ribecco, Marilena Martino, Giovanni De Matteis.

The following personnel contributed to the project at the participating centers:

- Istituto Nazionale Tumori - IRCCS – Fondazione G.Pascale, Napoli: Daniela Barberio, Ermelinda Quarata, Maria Florencia Gonzalez Leone, Gessica Migliaccio, Francesca Laudato, Maria Rosaria Esposito
- AO Ordine Mauriziano - S.C.D.U Oncologia Medica, Torino: Gaetano Lacidogna, Elisa Sperti, Francesca Vignani, Donatella Marino, Sabrina Terzolo, Luisa Fusco, Annalisa Bellezza, Laura Polimeno
- UOS Biostatistica - Istituto Regina Elena, Roma (Diana Giannarelli, Filomena Spasiano, Luana Fotia, Barbara Matrasci)
- U.O.C. Oncologia Medica A.O. Garibaldi, Catania (Roberto Bordonaro, Stefano Cordio, Concetta Sergi, Fabrizio Castagna, Francesco Avola, Laura Longhitano, Desiree Caudullo)
- U.O.C. Oncologia Medica - Ospedale Senatore Antonio Perrino, Brindisi (Saverio Cinieri, Manuela Caloro, Laura Orlando, Dario Loparco)

- 1
- 2
- 3 • Oncologia Medica 2 - IRCCS AOU San Martino - IST, Genova (Lucia Del Mastro)
- 4
- 5 • AO Ordine Mauriziano - S.C.D.U Oncologia Medica, Torino (Massimo Di Maio)
- 6
- 7 • U.O.C. Oncologia - Presidio Monaldi - AORN dei Colli, Napoli (Vincenzo
- 8 Montesarchio, Giusy Petrillo)
- 9
- 10 • Unità operativa complessa di Oncologia Medica - AOU di Sassari (Antonio Pazzola,
- 11 Alessio Aligi Cogoni)
- 12
- 13 • Oncologia traslazionale – I.R.C.C.S. Istituti Clinici Scientifici Maugeri, Pavia (Camillo
- 14 Porta)
- 15
- 16 • U.O.C. Oncologia 1, Istituto Oncologico Veneto, IOV, IRCCS Padova (Vittorina
- 17 Zagonel, Eleonora Bergo).
- 18
- 19
- 20
- 21

22 Italian to English translation was done thank to the voluntary contribution of Iain Halliday,  
23 Salvo Ciancitto, and Francesca Vigo (University of Catania, Dipartimento di Scienze  
24 Umanistiche), and Daniel Matheson (freelance translator).

25  
26  
27  
28  
29 A graphic logo (see below) has been created thanks to the voluntary contribution of Valeria  
30 Lepore, Pierpaola Borzacchiello, and Carla Langella (director), Design per la Valorizzazione  
31 Scientifica, Università della Campania Luigi Vanvitelli.

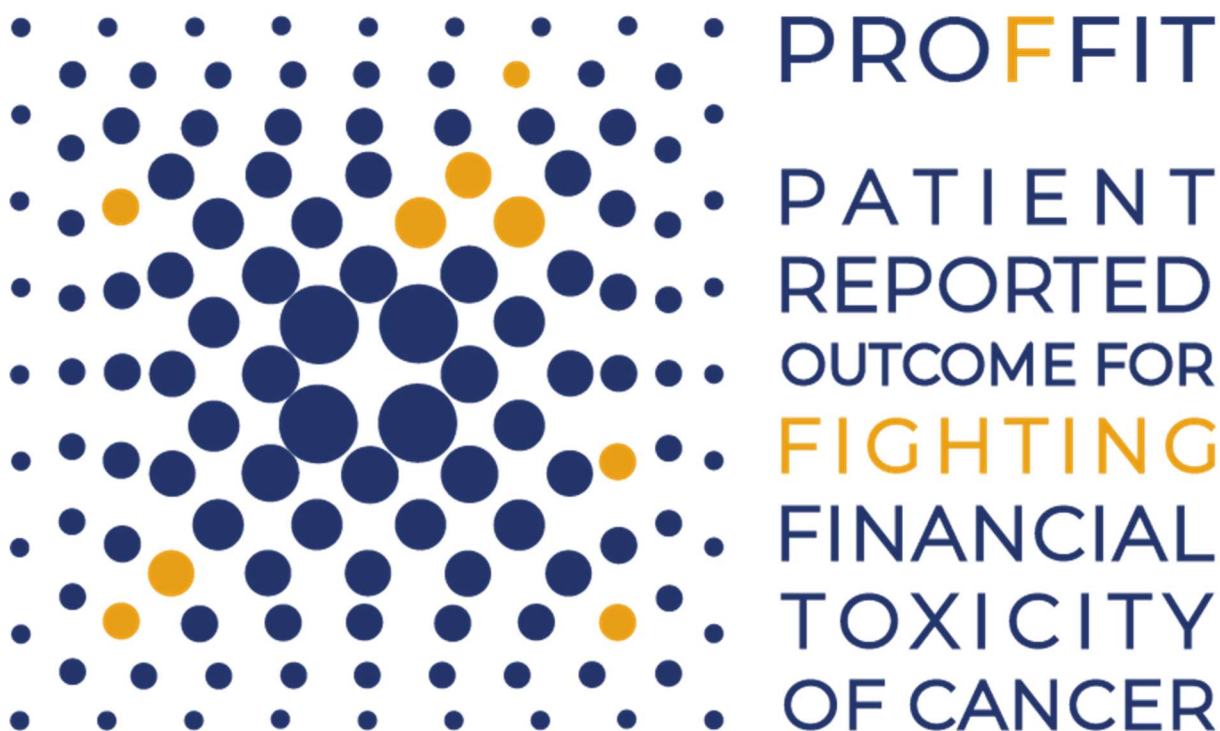

## Scoring procedure

Four categories of agreement with the statement of each item are allowed, scoring from 1 to 4: 1 - I do not agree at all, 2 - I agree partially, 3 - I agree substantially, 4 - I very much agree. Missing responses must be described but must not be used for scores calculation.

PROFFIT raw scores are to be normalised to 0-100%, where 100 indicates the highest toxicity.

For calculation of the FT-score, including items #1 to #7, the following steps should be followed:

- Reverse the score for Item 1 according to the following formula

$$X_{1-reverse} = 5 - X_1$$

where  $X_1$  is the response given to item 1.

- Calculate the FT-score according to the following formula

$$\frac{X_{1-reverse} + X_2 + X_3 + X_4 + X_5 + X_6 + X_7 - Y}{3 \times Y} \times 100$$

where  $X$  is the response given for each item and  $Y$  is the number of items with valid response.

For calculation of the score for items #8, #12, #14, #15 and #16 use the following formula

$$\frac{4 - X_j}{3} \times 100$$

where  $X$  is the response given and  $j$  is the item (8, 12, 15, or 16).

For calculation of the score for items #9, #10, #11, #13 use the following formula

$$\frac{X_j - 1}{3} \times 100$$

where  $X$  is the response given and  $j$  is the item (9, 10, 11 or 13).



**Table S1. EFA on the seven outcome items remaining in the final questionnaire**

| Item number | Full sample (N=184)      |             | Restricted sample (N=116) |          |                        |          |             |
|-------------|--------------------------|-------------|---------------------------|----------|------------------------|----------|-------------|
|             | Unrotated factor loading | Communality | Unrotated factor loading  |          | Rotated factor loading |          | Communality |
|             | Factor 1                 |             | Factor 1                  | Factor 2 | Factor 1               | Factor 2 |             |
| 1           | -0.558                   | 0.312       | -0.456                    | 0.246    | -0.498                 | -0.146   | 0.269       |
| 2           | 0.803                    | 0.644       | 0.823                     | 0.246    | 0.412                  | 0.754    | 0.737       |
| 3           | 0.787                    | 0.619       | 0.793                     | 0.138    | 0.467                  | 0.656    | 0.648       |
| 4           | 0.738                    | 0.545       | 0.698                     | -0.315   | 0.718                  | 0.267    | 0.588       |
| 5           | 0.735                    | 0.541       | 0.700                     | 0.143    | 0.397                  | 0.594    | 0.510       |
| 6           | 0.697                    | 0.488       | 0.635                     | -0.406   | 0.737                  | 0.158    | 0.566       |
| 7           | 0.587                    | 0.345       | 0.428                     | 0.415    | 0.013                  | 0.596    | 0.356       |

**Table S2. Spearman correlation coefficients  
between each item and total score\***

| Item number | Full sample (N=184) | Restricted sample (N=116) |
|-------------|---------------------|---------------------------|
| 1           | 0.5325              | 0.5243                    |
| 2           | 0.7360              | 0.7267                    |
| 3           | 0.7251              | 0.7158                    |
| 4           | 0.6646              | 0.6559                    |
| 5           | 0.6887              | 0.6765                    |
| 6           | 0.6712              | 0.6626                    |
| 7           | 0.5537              | 0.3684                    |

\*calculated removing each item from the sum

**Table S3. Test-retest results**

| Item number              | ICC  | Weighted K | Agreement % |
|--------------------------|------|------------|-------------|
| <b>Outcome items</b>     |      |            |             |
| 1.                       | 0.70 | 0.70       | 95.7        |
| 2.                       | 0.68 | 0.68       | 93.7        |
| 3.                       | 0.56 | 0.56       | 90.7        |
| 4.                       | 0.64 | 0.64       | 93.2        |
| 5.                       | 0.65 | 0.65       | 91.0        |
| 6.                       | 0.65 | 0.65       | 93.9        |
| 7.                       | 0.79 | 0.81       | 94.4        |
| <b>Determinant items</b> |      |            |             |
| 8.                       | 0.61 | 0.61       | 94.4        |
| 9.                       | 0.72 | 0.72       | 94.2        |
| 10.                      | 0.65 | 0.65       | 93.0        |
| 11.                      | 0.61 | 0.62       | 92.4        |
| 12.                      | 0.79 | 0.79       | 96.6        |
| 13.                      | 0.78 | 0.78       | 92.2        |
| 14.                      | 0.53 | 0.52       | 96.5        |
| 15.                      | 0.59 | 0.58       | 95.0        |
| 16.                      | 0.61 | 0.61       | 93.9        |

# Reporting checklist for cross sectional study.

Based on the STROBE cross sectional guidelines.

## Instructions to authors

Complete this checklist by entering the page numbers from your manuscript where readers will find each of the items listed below.

Your article may not currently address all the items on the checklist. Please modify your text to include the missing information. If you are certain that an item does not apply, please write "n/a" and provide a short explanation.

Upload your completed checklist as an extra file when you submit to a journal.

In your methods section, say that you used the STROBE cross sectional reporting guidelines, and cite them as:

von Elm E, Altman DG, Egger M, Pocock SJ, Gøtzsche PC, Vandenbroucke JP. The Strengthening the Reporting of Observational Studies in Epidemiology (STROBE) Statement: guidelines for reporting observational studies.

|                           | Reporting Item                                                                                                      | Page Number |
|---------------------------|---------------------------------------------------------------------------------------------------------------------|-------------|
| <b>Title and abstract</b> |                                                                                                                     |             |
| Title                     | <a href="#">#1a</a> Indicate the study's design with a commonly used term in the title or the abstract              | 1           |
| Abstract                  | <a href="#">#1b</a> Provide in the abstract an informative and balanced summary of what was done and what was found | 4           |

|    |                      |                     |                                                            |     |
|----|----------------------|---------------------|------------------------------------------------------------|-----|
| 1  | <b>Introduction</b>  |                     |                                                            |     |
| 2  |                      |                     |                                                            |     |
| 3  |                      |                     |                                                            |     |
| 4  | Background /         | <a href="#">#2</a>  | Explain the scientific background and rationale for the    | 5   |
| 5  |                      |                     |                                                            |     |
| 6  | rationale            |                     | investigation being reported                               |     |
| 7  |                      |                     |                                                            |     |
| 8  |                      |                     |                                                            |     |
| 9  | Objectives           | <a href="#">#3</a>  | State specific objectives, including any prespecified      | 5   |
| 10 |                      |                     | hypotheses                                                 |     |
| 11 |                      |                     |                                                            |     |
| 12 |                      |                     |                                                            |     |
| 13 |                      |                     |                                                            |     |
| 14 |                      |                     |                                                            |     |
| 15 | <b>Methods</b>       |                     |                                                            |     |
| 16 |                      |                     |                                                            |     |
| 17 |                      |                     |                                                            |     |
| 18 | Study design         | <a href="#">#4</a>  | Present key elements of study design early in the paper    | 6   |
| 19 |                      |                     |                                                            |     |
| 20 |                      |                     |                                                            |     |
| 21 | Setting              | <a href="#">#5</a>  | Describe the setting, locations, and relevant dates,       | 10  |
| 22 |                      |                     |                                                            |     |
| 23 |                      |                     | including periods of recruitment, exposure, follow-up,     |     |
| 24 |                      |                     |                                                            |     |
| 25 |                      |                     | and data collection                                        |     |
| 26 |                      |                     |                                                            |     |
| 27 |                      |                     |                                                            |     |
| 28 |                      |                     |                                                            |     |
| 29 | Eligibility criteria | <a href="#">#6a</a> | Give the eligibility criteria, and the sources and methods | 6   |
| 30 |                      |                     | of selection of participants.                              |     |
| 31 |                      |                     |                                                            |     |
| 32 |                      |                     |                                                            |     |
| 33 |                      |                     |                                                            |     |
| 34 |                      | <a href="#">#7</a>  | Clearly define all outcomes, exposures, predictors,        | 6   |
| 35 |                      |                     |                                                            |     |
| 36 |                      |                     | potential confounders, and effect modifiers. Give          |     |
| 37 |                      |                     |                                                            |     |
| 38 |                      |                     | diagnostic criteria, if applicable                         |     |
| 39 |                      |                     |                                                            |     |
| 40 |                      |                     |                                                            |     |
| 41 |                      |                     |                                                            |     |
| 42 | Data sources /       | <a href="#">#8</a>  | For each variable of interest give sources of data and     | 6   |
| 43 |                      |                     |                                                            |     |
| 44 | measurement          |                     | details of methods of assessment (measurement).            |     |
| 45 |                      |                     |                                                            |     |
| 46 |                      |                     | Describe comparability of assessment methods if there      |     |
| 47 |                      |                     |                                                            |     |
| 48 |                      |                     | is more than one group. Give information separately for    |     |
| 49 |                      |                     |                                                            |     |
| 50 |                      |                     | for exposed and unexposed groups if applicable.            |     |
| 51 |                      |                     |                                                            |     |
| 52 |                      |                     |                                                            |     |
| 53 |                      |                     |                                                            |     |
| 54 | Bias                 | <a href="#">#9</a>  | Describe any efforts to address potential sources of       | 7-8 |
| 55 |                      |                     |                                                            |     |
| 56 |                      |                     | bias                                                       |     |
| 57 |                      |                     |                                                            |     |
| 58 |                      |                     |                                                            |     |
| 59 |                      |                     |                                                            |     |
| 60 |                      |                     |                                                            |     |

|    |                |                      |                                                            |     |
|----|----------------|----------------------|------------------------------------------------------------|-----|
| 1  | Study size     | <a href="#">#10</a>  | Explain how the study size was arrived at                  | 6   |
| 2  |                |                      |                                                            |     |
| 3  |                |                      |                                                            |     |
| 4  | Quantitative   | <a href="#">#11</a>  | Explain how quantitative variables were handled in the     | 7   |
| 5  | variables      |                      | analyses. If applicable, describe which groupings were     |     |
| 6  |                |                      | chosen, and why                                            |     |
| 7  |                |                      |                                                            |     |
| 8  |                |                      |                                                            |     |
| 9  |                |                      |                                                            |     |
| 10 |                |                      |                                                            |     |
| 11 | Statistical    | <a href="#">#12a</a> | Describe all statistical methods, including those used to  | 7-8 |
| 12 | methods        |                      | control for confounding                                    |     |
| 13 |                |                      |                                                            |     |
| 14 |                |                      |                                                            |     |
| 15 |                |                      |                                                            |     |
| 16 |                |                      |                                                            |     |
| 17 | Statistical    | <a href="#">#12b</a> | Describe any methods used to examine subgroups and         | 7-8 |
| 18 | methods        |                      | interactions                                               |     |
| 19 |                |                      |                                                            |     |
| 20 |                |                      |                                                            |     |
| 21 |                |                      |                                                            |     |
| 22 |                |                      |                                                            |     |
| 23 | Statistical    | <a href="#">#12c</a> | Explain how missing data were addressed                    | 8   |
| 24 | methods        |                      |                                                            |     |
| 25 |                |                      |                                                            |     |
| 26 |                |                      |                                                            |     |
| 27 |                |                      |                                                            |     |
| 28 | Statistical    | <a href="#">#12d</a> | If applicable, describe analytical methods taking          | 8   |
| 29 | methods        |                      | account of sampling strategy                               |     |
| 30 |                |                      |                                                            |     |
| 31 |                |                      |                                                            |     |
| 32 |                |                      |                                                            |     |
| 33 | Statistical    | <a href="#">#12e</a> | Describe any sensitivity analyses                          | 7-8 |
| 34 | methods        |                      |                                                            |     |
| 35 |                |                      |                                                            |     |
| 36 |                |                      |                                                            |     |
| 37 |                |                      |                                                            |     |
| 38 |                |                      |                                                            |     |
| 39 | <b>Results</b> |                      |                                                            |     |
| 40 |                |                      |                                                            |     |
| 41 |                |                      |                                                            |     |
| 42 | Participants   | <a href="#">#13a</a> | Report numbers of individuals at each stage of study—      | 10  |
| 43 |                |                      | eg numbers potentially eligible, examined for eligibility, |     |
| 44 |                |                      | confirmed eligible, included in the study, completing      |     |
| 45 |                |                      | follow-up, and analysed. Give information separately for   |     |
| 46 |                |                      | for exposed and unexposed groups if applicable.            |     |
| 47 |                |                      |                                                            |     |
| 48 |                |                      |                                                            |     |
| 49 |                |                      |                                                            |     |
| 50 |                |                      |                                                            |     |
| 51 |                |                      |                                                            |     |
| 52 |                |                      |                                                            |     |
| 53 |                |                      |                                                            |     |
| 54 | Participants   | <a href="#">#13b</a> | Give reasons for non-participation at each stage           | 10  |
| 55 |                |                      |                                                            |     |
| 56 |                |                      |                                                            |     |
| 57 |                |                      |                                                            |     |
| 58 |                |                      |                                                            |     |
| 59 |                |                      |                                                            |     |
| 60 |                |                      |                                                            |     |

|    |                  |                      |                                                              |                |
|----|------------------|----------------------|--------------------------------------------------------------|----------------|
| 1  | Participants     | <a href="#">#13c</a> | Consider use of a flow diagram                               | Considered     |
| 2  |                  |                      |                                                              |                |
| 3  |                  |                      |                                                              | but deemed     |
| 4  |                  |                      |                                                              | useless        |
| 5  |                  |                      |                                                              |                |
| 6  |                  |                      |                                                              |                |
| 7  |                  |                      |                                                              |                |
| 8  |                  |                      |                                                              |                |
| 9  | Descriptive data | <a href="#">#14a</a> | Give characteristics of study participants (eg               | 10 (Table 1)   |
| 10 |                  |                      | demographic, clinical, social) and information on            |                |
| 11 |                  |                      | exposures and potential confounders. Give information        |                |
| 12 |                  |                      | separately for exposed and unexposed groups if               |                |
| 13 |                  |                      | applicable.                                                  |                |
| 14 |                  |                      |                                                              |                |
| 15 |                  |                      |                                                              |                |
| 16 |                  |                      |                                                              |                |
| 17 |                  |                      |                                                              |                |
| 18 |                  |                      |                                                              |                |
| 19 |                  |                      |                                                              |                |
| 20 |                  |                      |                                                              |                |
| 21 | Descriptive data | <a href="#">#14b</a> | Indicate number of participants with missing data for        | 10             |
| 22 |                  |                      | each variable of interest                                    |                |
| 23 |                  |                      |                                                              |                |
| 24 |                  |                      |                                                              |                |
| 25 |                  |                      |                                                              |                |
| 26 | Outcome data     | <a href="#">#15</a>  | Report numbers of outcome events or summary                  | Not applicable |
| 27 |                  |                      | measures. Give information separately for exposed and        |                |
| 28 |                  |                      | unexposed groups if applicable.                              |                |
| 29 |                  |                      |                                                              |                |
| 30 |                  |                      |                                                              |                |
| 31 |                  |                      |                                                              |                |
| 32 |                  |                      |                                                              |                |
| 33 |                  |                      |                                                              |                |
| 34 | Main results     | <a href="#">#16a</a> | Give unadjusted estimates and, if applicable,                | Not applicable |
| 35 |                  |                      | confounder-adjusted estimates and their precision (eg,       |                |
| 36 |                  |                      | 95% confidence interval). Make clear which                   |                |
| 37 |                  |                      | confounders were adjusted for and why they were              |                |
| 38 |                  |                      | included                                                     |                |
| 39 |                  |                      |                                                              |                |
| 40 |                  |                      |                                                              |                |
| 41 |                  |                      |                                                              |                |
| 42 |                  |                      |                                                              |                |
| 43 |                  |                      |                                                              |                |
| 44 |                  |                      |                                                              |                |
| 45 |                  |                      |                                                              |                |
| 46 | Main results     | <a href="#">#16b</a> | Report category boundaries when continuous variables         | Not applicable |
| 47 |                  |                      | were categorized                                             |                |
| 48 |                  |                      |                                                              |                |
| 49 |                  |                      |                                                              |                |
| 50 |                  |                      |                                                              |                |
| 51 | Main results     | <a href="#">#16c</a> | If relevant, consider translating estimates of relative risk | Not applicable |
| 52 |                  |                      | into absolute risk for a meaningful time period              |                |
| 53 |                  |                      |                                                              |                |
| 54 |                  |                      |                                                              |                |
| 55 |                  |                      |                                                              |                |
| 56 |                  |                      |                                                              |                |
| 57 |                  |                      |                                                              |                |
| 58 |                  |                      |                                                              |                |
| 59 |                  |                      |                                                              |                |
| 60 |                  |                      |                                                              |                |

|    |                          |                     |                                                            |       |
|----|--------------------------|---------------------|------------------------------------------------------------|-------|
| 1  | Other analyses           | <a href="#">#17</a> | Report other analyses done—e.g., analyses of               | 10-11 |
| 2  |                          |                     | subgroups and interactions, and sensitivity analyses       |       |
| 3  |                          |                     |                                                            |       |
| 4  |                          |                     |                                                            |       |
| 5  |                          |                     |                                                            |       |
| 6  | <b>Discussion</b>        |                     |                                                            |       |
| 7  |                          |                     |                                                            |       |
| 8  |                          |                     |                                                            |       |
| 9  |                          |                     |                                                            |       |
| 10 | Key results              | <a href="#">#18</a> | Summarise key results with reference to study              | 13-14 |
| 11 |                          |                     | objectives                                                 |       |
| 12 |                          |                     |                                                            |       |
| 13 |                          |                     |                                                            |       |
| 14 |                          |                     |                                                            |       |
| 15 | Limitations              | <a href="#">#19</a> | Discuss limitations of the study, taking into account      | 13-14 |
| 16 |                          |                     | sources of potential bias or imprecision. Discuss both     |       |
| 17 |                          |                     | direction and magnitude of any potential bias.             |       |
| 18 |                          |                     |                                                            |       |
| 19 |                          |                     |                                                            |       |
| 20 |                          |                     |                                                            |       |
| 21 |                          |                     |                                                            |       |
| 22 |                          |                     |                                                            |       |
| 23 | Interpretation           | <a href="#">#20</a> | Give a cautious overall interpretation considering         | 14-15 |
| 24 |                          |                     | objectives, limitations, multiplicity of analyses, results |       |
| 25 |                          |                     | from similar studies, and other relevant evidence.         |       |
| 26 |                          |                     |                                                            |       |
| 27 |                          |                     |                                                            |       |
| 28 |                          |                     |                                                            |       |
| 29 |                          |                     |                                                            |       |
| 30 | Generalisability         | <a href="#">#21</a> | Discuss the generalisability (external validity) of the    | 14    |
| 31 |                          |                     | study results                                              |       |
| 32 |                          |                     |                                                            |       |
| 33 |                          |                     |                                                            |       |
| 34 |                          |                     |                                                            |       |
| 35 | <b>Other Information</b> |                     |                                                            |       |
| 36 |                          |                     |                                                            |       |
| 37 |                          |                     |                                                            |       |
| 38 |                          |                     |                                                            |       |
| 39 | Funding                  | <a href="#">#22</a> | Give the source of funding and the role of the funders     | 15    |
| 40 |                          |                     | for the present study and, if applicable, for the original |       |
| 41 |                          |                     | study on which the present article is based                |       |
| 42 |                          |                     |                                                            |       |
| 43 |                          |                     |                                                            |       |
| 44 |                          |                     |                                                            |       |
| 45 |                          |                     |                                                            |       |

46 None The STROBE checklist is distributed under the terms of the Creative Commons Attribution  
47 License CC-BY. This checklist can be completed online using <https://www.goodreports.org/>, a tool  
48 made by the [EQUATOR Network](#) in collaboration with [Penelope.ai](#)  
49  
50  
51  
52  
53  
54  
55  
56  
57  
58  
59



# BMJ Open

## A cross-sectional study to develop and describe psychometric characteristics of a patient-reported instrument (PROFFIT) for measuring financial toxicity of cancer within a public healthcare system

|                               |                                                                                                                                                                                                                                                                                                                                                                                                                                                                                                                                                                                                                                                                                                                                                                                                                                                                                                                                                                                                                                                                                                                                                                                                                                                                                                                                                                                                                                                                                                                                                                                                                                                                                                                                                                                                                                                                                                                                                                                                                                                                                                                                                                                                                                                |
|-------------------------------|------------------------------------------------------------------------------------------------------------------------------------------------------------------------------------------------------------------------------------------------------------------------------------------------------------------------------------------------------------------------------------------------------------------------------------------------------------------------------------------------------------------------------------------------------------------------------------------------------------------------------------------------------------------------------------------------------------------------------------------------------------------------------------------------------------------------------------------------------------------------------------------------------------------------------------------------------------------------------------------------------------------------------------------------------------------------------------------------------------------------------------------------------------------------------------------------------------------------------------------------------------------------------------------------------------------------------------------------------------------------------------------------------------------------------------------------------------------------------------------------------------------------------------------------------------------------------------------------------------------------------------------------------------------------------------------------------------------------------------------------------------------------------------------------------------------------------------------------------------------------------------------------------------------------------------------------------------------------------------------------------------------------------------------------------------------------------------------------------------------------------------------------------------------------------------------------------------------------------------------------|
| Journal:                      | <i>BMJ Open</i>                                                                                                                                                                                                                                                                                                                                                                                                                                                                                                                                                                                                                                                                                                                                                                                                                                                                                                                                                                                                                                                                                                                                                                                                                                                                                                                                                                                                                                                                                                                                                                                                                                                                                                                                                                                                                                                                                                                                                                                                                                                                                                                                                                                                                                |
| Manuscript ID                 | bmjopen-2021-049128.R1                                                                                                                                                                                                                                                                                                                                                                                                                                                                                                                                                                                                                                                                                                                                                                                                                                                                                                                                                                                                                                                                                                                                                                                                                                                                                                                                                                                                                                                                                                                                                                                                                                                                                                                                                                                                                                                                                                                                                                                                                                                                                                                                                                                                                         |
| Article Type:                 | Original research                                                                                                                                                                                                                                                                                                                                                                                                                                                                                                                                                                                                                                                                                                                                                                                                                                                                                                                                                                                                                                                                                                                                                                                                                                                                                                                                                                                                                                                                                                                                                                                                                                                                                                                                                                                                                                                                                                                                                                                                                                                                                                                                                                                                                              |
| Date Submitted by the Author: | 10-Jun-2021                                                                                                                                                                                                                                                                                                                                                                                                                                                                                                                                                                                                                                                                                                                                                                                                                                                                                                                                                                                                                                                                                                                                                                                                                                                                                                                                                                                                                                                                                                                                                                                                                                                                                                                                                                                                                                                                                                                                                                                                                                                                                                                                                                                                                                    |
| Complete List of Authors:     | <p>Riva, Silvia; St Mary's University; University Hospital of Milan<br/> Arenare, Laura<br/> Di Maio, Massimo; Università degli Studi di Torino, Dipartimento di Oncologia, AO Ordine Mauriziano<br/> Efficace, Fabio; Italian Group for Adult Hematologic Diseases (GIMEMA)<br/> Montesarchio, Vincenzo; AORN Ospedali dei Colli, Oncologia<br/> Frontini, Luciano; Federation of Italian Cooperative Oncology Groups (FICOG)<br/> Giannarelli, Diana; Istituto Nazionale per lo Studio e la Cura dei Tumori Regina Elena, IRCCS, Unità di Biostatistica<br/> Bryce, Jane; Istituto Nazionale Tumori IRCCS Fondazione Pascale, Unità Sperimentazioni Cliniche<br/> Del Campo, Laura; Federazione italiana delle Associazioni di Volontariato in Oncologia (FAVO)<br/> De Lorenzo, Francesco; Associazione Italiana Malati di Cancro (AIMAC); European Cancer Patient Coalition (ECPC)<br/> Iannelli, Elisabetta; F.A.V.O. Italian Federation of Volunteer-Based Cancer Organizations<br/> Tracò, Francesca; Associazione Italiana Malati di Cancro (AIMAC)<br/> Gitto, Lara; Università degli Studi di Messina, Dipartimento di Economia<br/> Jommi, Claudio; Università Bocconi<br/> Vaccaro, Concetta Maria; Censis - Centro Studi Investimenti Sociali, Area Welfare e Salute<br/> Barberio, Daniela; Istituto Nazionale Tumori IRCCS Fondazione Pascale, Struttura Semplice Dipartimentale di Psiconcologia Clinica<br/> Cinieri, Saverio; Ospedale Perrino, Oncologia<br/> Porta, Camillo; Fondazione IRCCS Policlinico San Matteo<br/> Del Mastro, Lucia; Ospedale Policlinico San Martino Istituto di Ricovero e Cura a Carattere Scientifico per l'Oncologia, Dipartimento di Medicina Interna e Medicina Specialistica; Università di Genova, Dipartimento di Medicina Interna e Medicina Specialistica<br/> Zagonel, Vittorina; Istituto Oncologico Veneto Istituto di Ricovero e Cura a Carattere Scientifico<br/> Cogoni, Alessio Aligi; AOU di Sassari, Unità operativa complessa di Oncologia Medica<br/> Bordonaro, Roberto; Azienda Ospedaliera di Rilievo Nazionale e di Alta Specializzazione Garibaldi Ospedale Garibaldi-Nesima, Oncologia<br/> Gimigliano, Anna; Istituto Nazionale Tumori IRCCS Fondazione Pascale,</p> |

|                                    |                                                                                                                                                                                                                                                                                                                                                                                                 |
|------------------------------------|-------------------------------------------------------------------------------------------------------------------------------------------------------------------------------------------------------------------------------------------------------------------------------------------------------------------------------------------------------------------------------------------------|
|                                    | Clinical Trials Unit<br>Piccirillo, Maria Carmela; Istituto Nazionale Tumori IRCCS Fondazione Pascale, Clinical Trials Unit<br>Guizzaro, Lorenzo; Università degli Studi della Campania Luigi Vanvitelli Gallo, Ciro; Università degli Studi della Campania Luigi Vanvitelli, Statistica Medica<br>Perrone, Francesco; Istituto Nazionale Tumori IRCCS Fondazione Pascale, Clinical Trials Unit |
| <b>Primary Subject Heading</b> :   | Health economics                                                                                                                                                                                                                                                                                                                                                                                |
| <b>Secondary Subject Heading</b> : | Oncology                                                                                                                                                                                                                                                                                                                                                                                        |
| <b>Keywords</b> :                  | Health economics < HEALTH SERVICES ADMINISTRATION & MANAGEMENT, ONCOLOGY, QUALITATIVE RESEARCH, Quality in health care < HEALTH SERVICES ADMINISTRATION & MANAGEMENT                                                                                                                                                                                                                            |
|                                    |                                                                                                                                                                                                                                                                                                                                                                                                 |

SCHOLARONE™  
Manuscripts



I, the Submitting Author has the right to grant and does grant on behalf of all authors of the Work (as defined in the below author licence), an exclusive licence and/or a non-exclusive licence for contributions from authors who are: i) UK Crown employees; ii) where BMJ has agreed a CC-BY licence shall apply, and/or iii) in accordance with the terms applicable for US Federal Government officers or employees acting as part of their official duties; on a worldwide, perpetual, irrevocable, royalty-free basis to BMJ Publishing Group Ltd ("BMJ") its licensees and where the relevant Journal is co-owned by BMJ to the co-owners of the Journal, to publish the Work in this journal and any other BMJ products and to exploit all rights, as set out in our [licence](#).

The Submitting Author accepts and understands that any supply made under these terms is made by BMJ to the Submitting Author unless you are acting as an employee on behalf of your employer or a postgraduate student of an affiliated institution which is paying any applicable article publishing charge ("APC") for Open Access articles. Where the Submitting Author wishes to make the Work available on an Open Access basis (and intends to pay the relevant APC), the terms of reuse of such Open Access shall be governed by a Creative Commons licence – details of these licences and which [Creative Commons](#) licence will apply to this Work are set out in our licence referred to above.

Other than as permitted in any relevant BMJ Author's Self Archiving Policies, I confirm this Work has not been accepted for publication elsewhere, is not being considered for publication elsewhere and does not duplicate material already published. I confirm all authors consent to publication of this Work and authorise the granting of this licence.

**A cross-sectional study to develop and describe psychometric characteristics of a patient-reported instrument (PROFFIT) for measuring financial toxicity of cancer within a public healthcare system**

Silvia Riva<sup>1,2</sup>, Laura Arenare<sup>3</sup>, Massimo Di Maio<sup>4</sup>, Fabio Efficace<sup>5</sup>, Vincenzo Montesarchio<sup>6</sup>, Luciano Frontini<sup>7</sup>, Diana Giannarelli<sup>8</sup>, Jane Bryce<sup>3,9,10</sup>, Laura Del Campo<sup>11</sup>, Francesco De Lorenzo<sup>12</sup>, Elisabetta Iannelli<sup>13</sup>, Francesca Tracò<sup>13</sup>, Lara Gitto<sup>14</sup>, Claudio Jommi<sup>15</sup>, Concetta Maria Vaccaro<sup>16</sup>, Daniela Barberio<sup>17</sup>, Saverio Cinieri<sup>18</sup>, Camillo Porta<sup>19a</sup>, Lucia Del Mastro<sup>20,21</sup>, Vittorina Zagonel<sup>22</sup>, Alessio Aligi Cogoni<sup>23</sup>, Roberto Bordonaro<sup>24</sup>, Anna Gimigliano<sup>3</sup>, Maria Carmela Piccirillo<sup>3</sup>, Lorenzo Guizzaro<sup>25</sup>, **Ciro Gallo<sup>25\*</sup>**, **Francesco Perrone<sup>3\*</sup>**

<sup>1</sup> St Mary's University, Twickenham, London, UK

<sup>2</sup> Fondazione IRCCS Ca' Granda Ospedale Maggiore Policlinico, University Hospital of Milan, Italy

<sup>3</sup> Unità Sperimentazioni Cliniche, Istituto Nazionale per lo Studio e la Cura dei Tumori, IRCCS, Fondazione G.Pascale, Napoli, Italy

<sup>4</sup> Dipartimento di Oncologia, Università di Torino, AO Ordine Mauriziano, Torino, Italy

<sup>5</sup> Gruppo Italiano per le Malattie Ematologiche dell'Adulto (GIMEMA) Health Outcomes Research Unit, Roma, Italy

<sup>6</sup> Azienda Ospedaliera Specialistica dei Colli, Napoli, Italy

<sup>7</sup> Federation of Italian Cooperative Oncology Groups (FICOG), Milano, Italy

<sup>8</sup> Unità di Biostatistica, Istituto Nazionale per lo Studio e la Cura dei Tumori Regina Elena, IRCCS, Roma, Italy

<sup>9</sup> Dipartimento di Biomedicina e Prevenzione, Università degli Studi di Roma "Tor Vergata", Roma, Italy

<sup>10</sup> Ascension St. John Clinical Research Institute, Tulsa, USA

<sup>11</sup> Federazione italiana delle Associazioni di Volontariato in Oncologia (FAVO), Rome, Italy

<sup>12</sup> European Cancer Patient Coalition (ECPC), Brussels, Belgium

<sup>13</sup> Associazione Italiana Malati di Cancro (AIMAC), Roma, Italy

<sup>14</sup> Dipartimento di Economia, Università degli Studi di Messina, Italy

<sup>15</sup> CER GAS (Centre for Health and Social Care Management), SDA Bocconi School of Management, Milano, Italy

<sup>16</sup> Area Welfare e Salute, Centro Studi Investimenti Sociali (CENSIS), Roma, Italy

<sup>17</sup> Struttura Semplice Dipartimentale di Psiconcologia Clinica, Istituto Nazionale per lo Studio e la Cura dei Tumori, IRCCS, Fondazione G.Pascale, Napoli, Italy

<sup>18</sup> Unità Operativa Complessa di Oncologia Medica, Ospedale Perrino, Brindisi, Italy

<sup>19</sup> Struttura Complessa di Oncologia Medica, Fondazione IRCCS Policlinico San Matteo, Pavia, Italy

<sup>20</sup> UO Breast Unit, IRCCS Ospedale Policlinico San Martino, Genova, Italy

<sup>21</sup> Dipartimento di Medicina Interna e Medicina Specialistica (DIMI), Università di Genova, Italy

<sup>22</sup> U.O.C. Oncologia 1, Istituto Oncologico Veneto, IOV, IRCCS Padova, Italy

<sup>23</sup> Unità operativa complessa di Oncologia Medica - AOU di Sassari, Italy

<sup>24</sup> Struttura Complessa di Oncologia Medica, ARNAS Garibaldi-Nesima, Catania, Italy

<sup>25</sup> Statistica Medica, Università degli Studi della Campania "Luigi Vanvitelli", Napoli, Italy.

\* co-last authors

<sup>a</sup> present address: Dipartimento di Scienze Biomediche ed Oncologia Umana, Università degli Studi di Bari 'A. Moro' e Azienda Ospedaliero-Universitaria Consorziale Policlinico di Bari, Bari, Italy.

**Corresponding author**

Dr. Francesco Perrone  
Unità Sperimentazioni Cliniche  
Istituto Nazionale per lo Studio e la Cura dei Tumori,  
IRCCS Fondazione Pascale, Napoli  
Via Mariano Semmola  
80131 Napoli, Italy  
[f.perrone@istitutotumori.na.it](mailto:f.perrone@istitutotumori.na.it)  
fax +390817702938  
phone +390815903571

**Word count:** 3438**Key words:** Financial toxicity, Cancer, Patient Reported Outcomes, Patient Reported Experiences, Health Economics

review only

1  
2  
3  
4  
5  
6  
7  
8  
9  
10  
11  
12  
13  
14  
15  
16  
17  
18  
19  
20  
21  
22  
23  
24  
25  
26  
27  
28  
29  
30  
31  
32  
33  
34  
35  
36  
37  
38  
39  
40  
41  
42  
43  
44  
45  
46  
47  
48  
49  
50  
51  
52  
53  
54  
55  
56  
57  
58  
59  
60

## Abstract

**Objectives:** To measure and explain financial toxicity (FT) of cancer in Italy, where a public healthcare system exists and cancer patients are not expected (or only marginally) to pay out-of-pocket for health care.

**Setting:** Ten clinical oncological centres, distributed across Italian macro-regions (North, Centre, South and Islands), including hospitals, university hospitals and national research institutes.

**Participants:** From Oct 8<sup>th</sup>, 2019 to Dec 11<sup>th</sup>, 2019, 184 patients, aged 18 or more, who were receiving or had received within the previous three months active anticancer treatment were enrolled, 108 (59%) females and 76 (41%) males.

**Intervention:** A 30-item pre-final questionnaire, previously developed within the qualitative tasks of the project, was administered, either electronically (n=115) or by paper sheet (n=69).

**Primary and secondary outcome measures:** According to the protocol and the International Society for Pharmacoeconomics and Outcomes Research (ISPOR) methodology, the final questionnaire was developed by mean of explanatory factor analysis and tested for reliability, internal consistency (Cronbach's  $\alpha$  test and item-total correlation) and stability of measurements over time (test-retest reliability by intra-class correlation coefficient and weighted Cohen's Kappa coefficient).

**Results:** After exploratory factor analysis, a score measuring FT (FT-score) was identified, made by 7 items dealing with outcomes of FT. The Cronbach alpha coefficient for the FT-score was 0.87 and the item-total correlation coefficients ranged from 0.53 to 0.74. Further, 9 single items representing possible determinants of FT were also retained in the final

1  
2  
3 instrument. Test-retest analysis revealed a good internal validity of the FT-score and the 16  
4  
5 items retained in the final questionnaire.  
6  
7

8 **Conclusions:** The PROFFIT (Patient Reported Outcome for Fighting Financial Toxicity)  
9  
10 instrument consists of 16 items and is the first reported instrument to assess FT of cancer  
11  
12 developed in a country with a fully public healthcare system.  
13  
14

15  
16 **Trial registration:** clinicaltrials.gov NCT 03473379.  
17  
18

## 19 20 21 22 **ARTICLE SUMMARY**

### 23 24 25 **Strengths and limitations of this study**

- 26  
27  
28 • PROFFIT was developed as a reaction to the finding that financial problems affect  
29  
30 the outcome of cancer patients in Italy, notwithstanding the Italian healthcare  
31  
32 system is based on universal coverage and patients do not pay to access cancer  
33  
34 treatment.  
35  
36
- 37  
38 • No tool for measuring and understanding financial toxicity of cancer had been ever  
39  
40 produced in the context of a public healthcare system with universal coverage.  
41  
42
- 43  
44 • The development of PROFFIT was done according to a widely accepted  
45  
46 methodology to produce patient reported outcome measures.  
47  
48
- 49  
50 • Correlation of PROFFIT with known anchors (quality of life tools, performance  
51  
52 status) and the responsiveness of the instrument over the course of the disease are  
53  
54 being studied.  
55  
56
- 57  
58 • PROFFIT might be of interest for other countries where a public healthcare system  
59  
60 exists.

## INTRODUCTION

Financial toxicity (FT) following cancer diagnosis and treatment is an increasingly recognized problem worldwide. While initial reports came from the United States, recent data suggest its importance in many other countries with different healthcare systems, like for example Japan, Nepal, Canada and Italy. [1-7] In 2016, we reported financial difficulties among Italian cancer patients enrolled in clinical trials, and their association with worse quality of life and overall survival. [5] Using individual data from 16 randomized trials, we found that patients reporting some degree of financial burden at baseline had a higher chance of worsening global quality of life (QoL) response after treatment, and that patients, who developed financial toxicity during treatment, had a statistically significant shorter survival. [5]

Therefore, in 2018, we started the multicentre PROFFIT (Patient Reported Outcome for Fighting Financial Toxicity of cancer) project to develop a tool for measuring and understanding financial toxicity of cancer that would be sensitive to dimensions of a universal healthcare system. The PROFFIT protocol and the early qualitative findings of the project were reported elsewhere. [8, 9] We herein report the quantitative analysis of the 30 items resulting from the early phases of the project and the final questionnaire.



## METHODS

The study protocol was approved by the independent ethical review board of the institutions enrolling patients and is registered on [clinicaltrials.gov](https://clinicaltrials.gov) NCT03473379. Overall, the project was performed according to International Society for Pharmacoeconomics and Outcomes Research (ISPOR) guidelines. [10, 11]

### Patient sample and data acquisition

To be included patients had to fulfil the following enrolment criteria: i) adult patients (>18 years), ii) histologically or cytologically confirmed diagnosis of any type of solid cancer or haematological malignancy, iii) medical treatment (chemotherapy, target agents, immunotherapy, hormonal treatment, radiotherapy or combinations of such therapies) ongoing or terminated within the previous three months. The questionnaires could be administered either as paper document or as a tablet digital version, according to centre choice. Written informed consent was required. The minimum sample size was calculated to assess the test-retest reliability. With an acceptable level of intraclass correlation coefficient (ICC) equal to 0.70 and an expected ICC of 0.80, a one-sided alpha 0.05, 80% power, at least 118 patients had to be enrolled.

### Instrument

The first two tasks of the PROFFIT project, concept elicitation and item generation, have been previously described. [9] Briefly, as for concept elicitation, an extensive list of topics related to FT was derived from literature review, expert survey and focus groups. Ten FT

1  
2  
3 domains (medical care, domestic economy, emotion, family, job, health workers, welfare  
4 state, free time and transportation) were described by 156 topics, that reduced to 55 items  
5 after correction for redundancy, and to 30 items after importance analysis. These 30 items  
6 were proposed to further 45 patients within cognitive interviews testing comprehensibility,  
7 recall, judgement and response; the 30 items refined after cognitive interviews represented  
8 the pre-final instrument (**Table S1**).

9  
10  
11  
12  
13  
14  
15  
16  
17 Two groups of items were identified by the study steering committee: (1) *outcome* items  
18 (n=10), i.e. indicators, that reflect the level of the supposed latent FT and that do not alter or  
19 influence the latent construct they measure, and (2) *determinant* items (n= 20), i.e. causal  
20 indicators, that are considered to affect FT and that may change the latent variable. [12]  
21  
22  
23  
24  
25  
26  
27 Separate analyses were performed in the outcome and determinant groups.

### 32 **Statistical analysis**

33  
34  
35 To reduce possible redundancy, the between-item correlation matrix was preliminarily  
36 estimated by pairwise Spearman rank correlation coefficients ( $r_s$ ), because of the ordinal  
37 nature of items; cut-off was set equal to 0.65, and for each pair of items with  $r_s > 0.65$  the  
38 item with the greater score in the previously published importance analysis was retained. [9]  
39  
40  
41  
42  
43  
44  
45 Because information was missing for the five items related to job in 68/184 (37%) patients,  
46 who declared themselves retired or jobless (i.e. househusbands, housewives or individuals  
47 in search of employment), correlation coefficients were estimated separately for job items  
48 (excluding patients with missing data on job items) and for all the other items (within the full  
49 population).

50  
51  
52  
53  
54  
55  
56  
57 Exploratory factor analysis (EFA) was used to discover the presence of multi-item scales  
58 and the distribution of the items consistent with the theoretical framework of FT. [13] To  
59  
60

1  
2  
3 **extract factors** we used the Principal Axis Factoring (PAF) analysis with Varimax rotation  
4  
5 and Kaiser normalization. To determine the number of scale factors, we relied on the Kaiser  
6  
7 criterion to select factors with eigenvalue  $>1$ , the Scree test to depict the percentage of total  
8  
9 variance explained by the factors extracted, and the interpretability of the factor solution.  
10  
11 PAF assumptions were assessed by Bartlett sphericity test and Kaiser-Meyer-Olkin (KMO)  
12  
13 measure of sampling adequacy. [14]  
14  
15

16  
17 Due to missing data in job items, EFA was performed both in the sample of patients with  
18  
19 complete valid information (hereby defined as “restricted sample”), and in the whole sample  
20  
21 (hereby defined as “full sample”), by imputing, for each subject, the missing values with the  
22  
23 average score of the other answered items. A more detailed description of the analysis is  
24  
25 reported in the Appendix.  
26  
27

28  
29 The face validity of the resulting scale was examined, both in terms of the scale global  
30  
31 meaning and in terms of the appropriateness of each individual item to that scale. Internal  
32  
33 consistency, i.e. within-scale between-items correlations, was assessed by Cronbach’s  
34  
35 alpha correlation coefficient, assuming as acceptable a value  $>0.70$ . Relationships between  
36  
37 each individual item  $x_i$  and the total score of the scale to which they were assumed to belong  
38  
39 were assessed by Spearman rank correlation coefficient with correction for overlap, i.e. by  
40  
41 omitting  $x_i$  from the total score. To evaluate stability of measurements over time, the  
42  
43 questionnaire was to be administered again after one week and the test–retest reliability  
44  
45 was assessed by intra-class correlation coefficient (ICC) and weighted Cohen’s Kappa  
46  
47 coefficient. We considered a minimally acceptable level of reliability equal to 0.70 and an  
48  
49 expected ICC of 0.80.  
50  
51  
52  
53

54  
55 Descriptive statistics were used to characterize the study sample and their mean scores  
56  
57 answers. The data met all the necessary assumptions for this factor analysis. Statistical  
58  
59  
60

1  
2  
3 analyses were performed with SPSS version 25.0 (SPSS; Chicago, IL, USA) and with Stata  
4  
5 14 (Stata, College Station, TX, USA)  
6  
7  
8  
9

## 10 11 **English translation** 12

13  
14 To allow international comprehension of the final PROFFIT questionnaire, an English  
15 translation was done according to methodology proposed by Wild et al.[15] First, a  
16 translation committee was established including five members of the Steering Committee  
17 (FP, SR, CG, MDM, FE), two English mother-tongue translators and two Italian mother-  
18 tongue translators. Second, the two English translators independently translated the tool  
19 into English producing two forward translations (T1 and T2) that were collected and  
20 subsequently discussed in a meeting where the agreement on the English version was  
21 achieved. Third, the two Italian translators (unaware of the original Italian version)  
22 independently back-translated the English version into Italian; their translations were  
23 collected and discussed in a meeting including the whole translation committee. During such  
24 meeting the final English translation was generated and approved by the Steering  
25 Committee. It is important to underline that the English translation has to be considered just  
26 to allow comprehension by non-Italian readers because it has not been cross-culturally  
27 adapted and validated within a population of English native patients.  
28  
29  
30  
31  
32  
33  
34  
35  
36  
37  
38  
39  
40  
41  
42  
43  
44  
45  
46  
47  
48  
49

## 50 **Patient and public involvement** 51

52 The project was informed by patients' thanks to the involvement of patients and  
53 representatives of patients' associations in the Steering Committee that oversaw all the  
54 phases of the project, including protocol definition, qualitative analysis (previously reported  
55 elsewhere) producing the pre-final questionnaire, and final analyses producing the final  
56  
57  
58  
59  
60

1  
2  
3 questionnaire (reported here); they are co-author of this manuscript and of the previous  
4  
5 manuscripts dealing with this project (LDC, FDL, EI, FT). They will also contribute in  
6  
7 dissemination of the results of the project.  
8  
9  
10  
11  
12  
13  
14  
15  
16  
17  
18  
19  
20  
21  
22  
23  
24  
25  
26  
27  
28  
29  
30  
31  
32  
33  
34  
35  
36  
37  
38  
39  
40  
41  
42  
43  
44  
45  
46  
47  
48  
49  
50  
51  
52  
53  
54  
55  
56  
57  
58  
59  
60

For peer review only

## RESULTS

From Oct 8<sup>th</sup>, 2019 to Dec 11<sup>th</sup>, 2019, 185 patients were enrolled at 10 participating centres; one patient was excluded because the baseline questionnaire was missing due to a technical problem with web connection of the tablet application. Questionnaires were administered as paper document in 4 centres (69 patients) and as digital tablet application in 6 centres (115 patients). Job-related items had a 37% rate of missing responses; all the remaining items were answered in 100% of the cases, leading to the full sample of 184 patients and the restricted sample of 116 patients.

Demographic and clinical characteristics of both samples are shown in **Table 1**. In the full sample, median age was 59 years (range 29-83) and participants were predominantly female. More than half of the patients had a high level of schooling (high school or degree), and around 70% were married. In terms of clinical characteristics, the great majority of patients had a previous surgery for cancer, and the most common treatment was chemotherapy. As expected, in the restricted sample, patients were younger, with a higher level of education and more frequently actively working.

At the preliminary between-item correlation analysis, six items were excluded (three job-related) because  $r_s$  was greater than 0.65, leading to 9 outcome and 15 determinant items for subsequent analyses (**Table S2a and S2b**).

EFA on the 9-outcome correlation matrix was first performed in the restricted sample of 116 subjects with complete information, because of the presence of the job item Q99. PAF assumptions on the 9 outcome items were met with very good parameters (KMO = 0.82 and Bartlett's test of sphericity,  $p$ -value <.001). Two items were excluded because of low communality (see appendix for details). With 7 outcome items, two initial eigenvalues were >1 and explained 66% of the total variance; both could be interpreted as expression of financial burden, the first one being more correlated with items mirroring an actual burden

1  
2  
3 while the second one appeared more correlated with worries about the future. This  
4 interpretation is reinforced when oblique Promax rotation was applied (see appendix).  
5  
6  
7

8 In the full sample (KMO = 0.87 and Bartlett's test of sphericity, p-value <.001), with missing  
9 imputation for the job-related item, similar findings were observed. Seven items were  
10 retained with only one factor >1 explaining 57% of the total variance; factor loadings and  
11 communalities are reported in the appendix (EFA on outcome paragraph).  
12  
13  
14  
15  
16  
17

18 Thus, the PROFFIT FT-score includes 7 outcome items. The Cronbach alpha coefficient for  
19 the PROFFIT FT-score was 0.85 in the restricted sample and 0.87 in the full sample,  
20 indicating that the correlation between the items and the score is consistently reliable.  
21  
22  
23  
24  
25  
26  
27  
28  
29  
30  
31  
32  
33  
34  
35  
36  
37  
38  
39  
40  
41  
42  
43  
44  
45  
46  
47  
48  
49  
50  
51  
52  
53  
54  
55  
56  
57  
58  
59  
60

Similarly, assumptions on the 15 determinants items were met with satisfactory parameters  
(KMO = 0.68 and Bartlett's test of sphericity, p-value <0.001). PAF on the determinant items  
eliminated 6 items because of low communality and showed that the other 9 items were only  
mildly related, without a clear definition of any factor, hence they were retained as single  
items (see appendix – EFA on determinants paragraph - for more details).

Therefore, the final PROFFIT instrument includes the FT-score (consisting of 7 items) and  
9 single items assessing possible determinants of FT. In **Table 2**, both the Italian items and  
the English translation are reported. The postulated causal structure for PROFFIT is  
reported in **Figure 1**.

We excluded from the test-retest analysis all questionnaires administered more than 35 days  
(n=52) after the first ones because of the possibility that more than one cycle of treatment  
could had been given during the interval. However, due to cyclic structure of ongoing

1  
2  
3 anticancer treatment, most retest questionnaires were actually administered later than the  
4  
5 planned one-week interval from the first assessment. Within 132 cases of the full sample,  
6  
7 median time between test and retest was 21 days; ICC and Cohen's weighted K coefficients  
8  
9 of the FT-score were excellent, being equal to 0.81 and 0.82, respectively. Considering each  
10  
11 singular item, all ICCs and K coefficients were good, ranging from 0.52 and 0.79 (**Table S4**).  
12  
13  
14  
15 Associations of FT-score with baseline characteristics of patients are reported in **Table S5**.  
16  
17 Significant and relevant differences were found in accordance with Italian macro-region,  
18  
19 age, education level and family disease burden.  
20  
21  
22  
23  
24  
25  
26  
27  
28  
29  
30  
31  
32  
33  
34  
35  
36  
37  
38  
39  
40  
41  
42  
43  
44  
45  
46  
47  
48  
49  
50  
51  
52  
53  
54  
55  
56  
57  
58  
59  
60



## DISCUSSION

Financial toxicity has been initially described in the United States as a factor negatively affecting cancer patients during their journey, in several ways.[7] Particularly, both QoL and survival have been reported to be worse among patients facing with financial hardships and bankruptcy. [16, 17] This might be not surprising given that the US health system prevalently requires out of pocket co-payment of medical expenses, and that the cost of cancer treatment has been steadily increasing. [18]

On the contrary, we were surprised when we earlier observed that financial problems (measured by the EORTC QLQ-C30 questionnaire) were associated with worse QoL and shorter survival also among Italian cancer patients, who actually live in a country with a 74% public coverage of healthcare system. [5, 19] However, the extreme simplicity of the single-item #28 of the EORTC QLQ-C30 questionnaire did not allow further understanding of the determinants of the phenomenon. Therefore, we decided to develop an instrument to describe financial toxicity more thoroughly and to explore potential determinants, within the Italian public health system, where the dynamics should be different as compared with a prevalently private health system like the US one. [20, 21].

The Italian health care system was shaped, since 1978, as a National Health Service (NHS) model, where the State is the most important financier, via general tax levies. [22] The NHS model prevails in Northern and Southern European Countries, whereas Central Europe is mostly characterized by social insurance-based model, funded by payroll taxes. Regardless the model, the European health care systems are characterized by a high proportion of healthcare expenditure covered by compulsory public programs, ranging from 66% in Spain to 78% in UK, compared to 49% in the USA. [19] The Italian NHS is decentralised, since regions are responsible for healthcare budget. [22] In Europe decentralisation does not depend on the healthcare system model: both NHS-shaped models (e.g. UK vs Spain) and

1  
2  
3 social-Insurance models (e.g. France vs Germany) are centralised vs decentralised  
4  
5 respectively. Italy shows a lower intermediation of private expenditure than the other major  
6  
7 European countries: in 2018 out-of-pocket expenditure accounted for 89% of private  
8  
9 expenditure in Italy, compared to 40%, 55% and 75% in Germany, France and UK/Spain  
10  
11 respectively. [23] The mean yearly amount of out-of-pocket expenses for cancer patients  
12  
13 was estimated in the same year to be 1841 euros within a survey conducted by the  
14  
15 Federazione italiana delle Associazioni di Volontariato in Oncologia – FAVO. [24]  
16  
17

18  
19 Here we report the PROFFIT questionnaire that, to the best of our knowledge, is the first  
20  
21 instrument fully published from a European country, and that is candidate to be cross-  
22  
23 culturally adapted and validated in other countries with health systems similar to the Italian  
24  
25 public health system. The PROFFIT questionnaire includes the FT-score (consisting of 7  
26  
27 items) and 9 single items assessing possible determinants of FT. In principle, the 7-item FT-  
28  
29 score could be immediately generalizable to every system, once validity has been  
30  
31 confirmed, while the 9 single-item determinants are strictly dependent on the healthcare  
32  
33 system. The latter ones, that are lacking in other tools like COST, were acknowledged by  
34  
35 patients in the cognitive interviews and should be the variable part of the questionnaire to  
36  
37 be assessed in the various frameworks. In terms of construct validity, the PROFFIT score  
38  
39 appears to be sensitive to patients' differences (e.g. Italian macro-regions, age, education  
40  
41 level and family burden of disease), while, on the contrary, the time from cancer diagnosis  
42  
43 has no impact on that score. However, together with other clinical questions, differences will  
44  
45 be further validated in a larger independent sample in the ongoing step 4 of the project by  
46  
47 using confirmatory analysis.  
48  
49  
50  
51  
52  
53  
54  
55  
56  
57  
58  
59  
60

1  
2  
3 The need to have a specific instrument to measure financial toxicity has been previously  
4 addressed in the United States by the Investigators who produced and validated the  
5 Comprehensive Score for Financial Toxicity (COST) instrument. [25, 26]  
6  
7  
8  
9

10 The methodology applied to develop PROFFIT is similar to that applied for the COST  
11 development, as both followed the ISPOR guidelines. [10, 11] Nevertheless, the content of  
12 the two instruments differ, according to the three domains (psychological response, material  
13 conditions and coping behaviours) proposed by Altice et al. to describe financial hardship.  
14 [27] Indeed, while 8 of the 11 items of the COST version 1 questionnaire fall into the “affect”  
15 theme and the psychological response domain, 11 out of the 16 PROFFIT items pertain to  
16 the material conditions domain. This marked difference supports that the sociocultural  
17 context and the health and social care systems may significantly affect the causes and the  
18 consequences of financial problems of cancer patients. [20, 21] Therefore, specific  
19 instruments should be used within different contexts, and an analysis of differences between  
20 social and health systems should be done before choosing which instrument might be more  
21 appropriate for measuring financial toxicity. An instrument like PROFFIT, including several  
22 items related to determinants of financial toxicity, may be helpful to identify potential targets  
23 for action; and such targets, indeed, might be not immediately identified within a public  
24 health system that should cover all the needs of cancer patients. Namely, items related to  
25 transportation costs, to medical expenses not adequately covered by the public health  
26 system and the items pertaining to the quality of medical and non-medical staff and the  
27 communication among them clearly indicate some roadmaps of intervention that should be  
28 addressed within projects of education, organisation and financial support of various  
29 compartments of the welfare system.  
30  
31  
32  
33  
34  
35  
36  
37  
38  
39  
40  
41  
42  
43  
44  
45  
46  
47  
48  
49  
50  
51  
52  
53  
54

55  
56  
57 Around one third of patients did not respond to items related to job activities. For this reason,  
58 we performed correlation analysis separately for job-related items and for all the other items,  
59  
60

1  
2  
3 and approached EFA using both a restricted sample, including only subjects answering all  
4 items, and the full sample, involving all subjects, where missing responses were imputed  
5 based on responses to the other valid items. We did that, according to the protocol, for both  
6 increasing the power of the analysis and as a sensitivity analysis of findings in the restricted  
7 sample. We chose to input the average score rather than the minimum score because the  
8 latter could be true for retired people (at least in the Italian population), but not for younger  
9 people without job. Further, this choice is consistent with the calculus of the score, where  
10 the missing items are not considered in the denominator. Accordingly, the restricted sample  
11 might be most sensitive to financial distress deriving from job loss or reduction but would  
12 not be representative of the real-world cancer patient population due to the selective  
13 exclusion of older patients, and generalizability would be reduced. On the contrary, the full  
14 sample, that is representative of the general cancer patient population might be less  
15 sensitive to relevance of job problems. We will further investigate the impact of job conditions  
16 in larger multicentre clinical studies through a more detailed definition of job categories,  
17 including all the types of unemployment that led to missing responses.

18  
19 Notwithstanding a longer than planned interval between test and retest questionnaire  
20 administration, that might in principle reduce reproducibility, a good reliability was observed  
21 with all the items.

22  
23 While usually a fixed time window is indicated in patient reported outcomes to define the  
24 period of interest, we decided not to use a fixed temporal frame to which refer the response.  
25 The decision was prompted by the consideration that in the final PROFFIT questionnaires,  
26 some of the items represent patient-reported experiences, rather than pure outcomes, and  
27 might derive from the accumulation of problems over the time. This should make the  
28 instrument more sensitive for cross-sectional studies, where it is not strictly important to  
29 define whether responses refer to a precise time window. Of course, when PROFFIT will be  
30

1  
2  
3 used as a tool within prospective trials comparing different treatment strategies, a fixed time  
4  
5 might be indicated.  
6  
7

8 According to the protocol, larger studies are planned to confirm criterion and construct  
9  
10 validity of the PROFFIT instrument, and to assess the responsiveness of the tool [12] over  
11  
12 the course of the disease. In the meanwhile, the questionnaire is available for all  
13  
14 Investigators wishing to cross-validate it into different languages and countries. No fee will  
15  
16 be required for using the questionnaire for purely academic studies, but registration of the  
17  
18 protocols will be required and written agreements with the National Cancer Institute of  
19  
20 Naples, Italy, will be requested.  
21  
22  
23

24  
25 In conclusion, financial toxicity is a major problem in oncology also within a universal  
26  
27 healthcare system, hence the availability of specific and validated instruments is crucial to  
28  
29 better understand its causes and its relationship with different aspects of cancer disease.  
30  
31 Ultimately, data generated via this newly developed tool will provide insights on how to  
32  
33 collaborate in the fight against financial toxicity, and hopefully improve the outcomes of  
34  
35 cancer patients.  
36  
37  
38  
39  
40  
41  
42  
43  
44  
45  
46  
47  
48  
49  
50  
51  
52  
53  
54  
55  
56  
57  
58  
59  
60

**Table 1. Characteristics of participating patients**

|                                                             | Full sample<br>N = 184 | Restricted sample<br>N = 116 |
|-------------------------------------------------------------|------------------------|------------------------------|
| <b>Gender, n (%)</b>                                        |                        |                              |
| Female                                                      | 108 (58,7)             | 63 (54,3)                    |
| Male                                                        | 76 (41,3)              | 53 (45,7)                    |
| <b>Age, median (range)</b>                                  | 59 (29-82)             | 55 (29-74)                   |
| <b>Age category, n (%)</b>                                  |                        |                              |
| ≤60                                                         | 94 (51,1)              | 72 (62,1)                    |
| >60                                                         | 90 (48,9)              | 44 (37,9)                    |
| <b>Macro-region of the participating institution, n (%)</b> |                        |                              |
| North                                                       | 71 (38,6)              | 46 (39,7)                    |
| Center                                                      | 15 (8,2)               | 9 (7,8)                      |
| South                                                       | 71 (38,6)              | 43 (37,1)                    |
| Islands                                                     | 27 (14,7)              | 18 (15,5)                    |
| <b>Education level, n (%)</b>                               |                        |                              |
| Elementary school                                           | 23 (12,5)              | 8 (6,9)                      |
| Middle school                                               | 57 (31,0)              | 33 (28,4)                    |
| High school/degree                                          | 104 (56,5)             | 75 (64,7)                    |
| <b>Marital status, n (%)</b>                                |                        |                              |
| Married                                                     | 132 (71,7)             | 82 (70,7)                    |
| Other                                                       | 52 (28,3)              | 34 (29,3)                    |
| <b>With dependent family members, n (%)</b>                 |                        |                              |
| No                                                          | 107 (58,2)             | 60 (51,7)                    |
| Yes                                                         | 77 (41,8)              | 56 (48,3)                    |
| <b>Family members with cancer or chronic disease, n (%)</b> |                        |                              |
| No                                                          | 82 (44,6)              | 52 (44,8)                    |
| Yes                                                         | 102 (55,4)             | 64 (55,2)                    |
| <b>Working status, n (%)</b>                                |                        |                              |
| Working                                                     | 84 (45,7)              | 82 (70,7)                    |
| Not working                                                 | 100 (54,3)             | 34 (29,3)                    |
| <b>Distance (km) from the hospital, median (range)</b>      | 20 (1-430)             | 25 (1-286)                   |
| <b>Time (years) from initial diagnosis, n (%)</b>           |                        |                              |
| ≤1                                                          | 80 (43,5)              | 54 (46,6)                    |
| 1-5                                                         | 65 (35,3)              | 38 (32,8)                    |
| ≥5                                                          | 39 (21,2)              | 24 (20,7)                    |

**Table 1. Characteristics of participating patients**

|                                      | Full sample<br>N = 184 | Restricted sample<br>N = 116 |
|--------------------------------------|------------------------|------------------------------|
| <b>Previous treatment, n (%)</b>     |                        |                              |
| Surgery                              | 129 (70,1)             | 81 (69,8)                    |
| Chemotherapy                         | 157 (85,3)             | 94 (81,0)                    |
| Target-based agents                  | 55 (29,9)              | 37 (31,9)                    |
| Immunotherapy                        | 38 (20,7)              | 28 (24,1)                    |
| Hormonal therapy                     | 31 (16,8)              | 18 (15,5)                    |
| Radiotherapy                         | 43 (23,4)              | 28 (24,1)                    |
| <b>Last/ongoing treatment, n (%)</b> |                        |                              |
| Chemotherapy                         | 135 (73,4)             | 79 (68,1)                    |
| Target-based agents                  | 18 (9,8)               | 13 (11,2)                    |
| Immunotherapy                        | 25 (13,6)              | 19 (16,4)                    |
| Hormonal therapy                     | 5 (2,7)                | 4 (3,4)                      |
| Radiotherapy                         | 1 (0,5)                | 1 (0,9)                      |
| <b>Primary tumour site, n (%)</b>    |                        |                              |
| Breast                               | 59 (32,1)              | 36 (31,0)                    |
| Lower_gastrointestinal tract         | 51 (27,7)              | 24 (20,7)                    |
| Genito-urinary                       | 34 (18,5)              | 27 (23,3)                    |
| Thoracic                             | 18 (9,8)               | 13 (11,2)                    |
| Upper_gastrointestinal tract         | 13 (7,1)               | 10 (8,6)                     |
| Other                                | 9 (4,9)                | 6 (5,2)                      |

**Table 2. Final PROFFIT instrument**

| Item type and number                    | Italian version                                                                                                              | English translation (for comprehension only)                                                                                                         |
|-----------------------------------------|------------------------------------------------------------------------------------------------------------------------------|------------------------------------------------------------------------------------------------------------------------------------------------------|
| <b>Outcome items (FT-score)</b>         |                                                                                                                              |                                                                                                                                                      |
| 1.                                      | Sono in grado di sostenere le mie spese mensili senza difficoltà (ad esempio per affitto, elettricità, telefono...)          | I can afford my monthly expenses without difficulty (for example rent, electricity, phone...)                                                        |
| 2.                                      | La mia malattia ha ridotto le mie disponibilità economiche                                                                   | My illness has reduced my financial resources                                                                                                        |
| 3.                                      | Sono preoccupato dei problemi economici che potrei avere in futuro a causa della malattia                                    | I am concerned by the economic problems I may have in the future due to my illness                                                                   |
| 4.                                      | La mia condizione economica incide sulle mie possibilità di curarmi                                                          | My economic situation affects the possibility of receiving medical care                                                                              |
| 5.                                      | Ho ridotto le spese per attività ricreative come vacanze, ristoranti o spettacoli per affrontare le spese della mia malattia | I have reduced my spending on leisure activities such as holidays, restaurants or entertainment in order to cope with expenses related to my illness |
| 6.                                      | Ho ridotto le spese per acquisti essenziali (ad esempio il cibo) per affrontare le spese per la mia malattia                 | I have reduced spending on essential goods (for example food) in order to cope with expenses related to my illness                                   |
| 7.                                      | Sono preoccupata/o di non riuscire a lavorare a causa della mia malattia                                                     | I am worried that I will not be able to work due to my illness                                                                                       |
| <b>Determinant items (single items)</b> |                                                                                                                              |                                                                                                                                                      |
| 8.                                      | Il Servizio Sanitario Nazionale copre tutti i costi sanitari associati alla mia malattia                                     | The National Health Service covers all health costs related to my illness                                                                            |
| 9.                                      | Ho sostenuto spese per una o più visite private per la mia malattia                                                          | I have paid for one or more private medical examinations for my illness                                                                              |
| 10.                                     | Ho sostenuto spese per farmaci supplementari o integratori per la mia malattia                                               | I have paid for additional medicines or supplements related to my illness                                                                            |
| 11.                                     | Devo sostenere spese per cure integrative a mio carico (es. fisioterapia, psicoterapia, cure odontoiatriche)                 | I have to pay for additional treatment myself (for example physiotherapy, psychotherapy, dental care)                                                |
| 12.                                     | Il centro di cura è lontano dalla mia abitazione                                                                             | The treatment centre is a long way from where I live                                                                                                 |
| 13.                                     | Ho dovuto sostenere rilevanti costi di trasporto per curarmi                                                                 | I have spent a considerable amount of money on travel for treatment                                                                                  |
| 14.                                     | Il personale sanitario (cioè medici, infermieri, etc.) ha agevolato il percorso di cura                                      | Medical staff (that is doctors, nurses etc.) have been helpful throughout my medical care                                                            |
| 15.                                     | Il personale ospedaliero amministrativo (cioè centro di prenotazione, segreterie, etc.) ha agevolato il percorso di cura     | Staff in hospital administration (that is for booking appointments, secretaries, etc.) have been helpful throughout my medical care                  |
| 16.                                     | C'è stata comunicazione tra i medici e le strutture sanitarie che mi seguono                                                 | Medical staff and medical facilities I attended communicated with each other                                                                         |



## Legend of figure

Figure 1. Postulated causal structure for PROFFIT tool

## Acknowledgments

See appendix.

## Authors contribution

FP obtained funding. SR, JB, CG and FP drafted the manuscript. MDM, FE, VM, LF, DG, LDC, FDL, EI, FT, LG, CJ, CMV, and MCP contributed to manuscript writing. MDM, VM, DG, DB, SC, CP, LDM, VZ, AAC, RB, AG and FP contributed to patients' enrolment. SR, LA, LG, CG and FP performed statistical analysis and drafted the manuscript. All Authors contributed to the manuscript and approved the final version.

## Data

Data will be made available upon request to the corresponding author.

## Funding

The project is supported by Fondazione AIRC (Associazione Italiana per la Ricerca sul Cancro), a non-profit Italian charity, IG 2017 Id 20402

## Ethical approval statement

The study protocol was initially approved by the Ethics Committee of the National Cancer Institute of Naples, that acted as coordinating Ethics Committee. Date of first approval is October 18, 2017 and code of approval is 18/17oss. Thereafter, the protocol was approved by Ethics Committee at each participating centre.

1  
2  
3  
4  
5  
6  
7  
8  
9  
10  
11  
12  
13  
14  
15  
16  
17  
18  
19  
20  
21  
22  
23  
24  
25  
26  
27  
28  
29  
30  
31  
32  
33  
34  
35  
36  
37  
38  
39  
40  
41  
42  
43  
44  
45  
46  
47  
48  
49  
50  
51  
52  
53  
54  
55  
56  
57  
58  
59  
60

For peer review only

## References

1. Ezeife DA, Morganstein BJ, Lau S et al. Financial Burden Among Patients With Lung Cancer in a Publically Funded Health Care System. *Clin Lung Cancer* 2018.
2. Honda K, Gyawali B, Ando M et al. Prospective Survey of Financial Toxicity Measured by the Comprehensive Score for Financial Toxicity in Japanese Patients With Cancer. *J Glob Oncol* 2019; 5: 1-8.
3. Longo CJ, Fitch MI, Banfield L et al. Financial toxicity associated with a cancer diagnosis in publicly funded healthcare countries: a systematic review. *Supportive Care in Cancer* 2020; 28: 4645-4665.
4. Lueckmann SL, Schumann N, Hoffmann L et al. 'It was a big monetary cut'-A qualitative study on financial toxicity analysing patients' experiences with cancer costs in Germany. *Health Soc Care Community* 2020; 28: 771-780.
5. Perrone F, Jommi C, Di Maio M et al. The association of financial difficulties with clinical outcomes in cancer patients: secondary analysis of 16 academic prospective clinical trials conducted in Italy. *Ann Oncol* 2016; 27: 2224-2229.
6. Poudyal BS, Giri S, Tuladhar S et al. A survey in Nepalese patients with acute leukaemia: a starting point for defining financial toxicity of cancer care in low-income and middle-income countries. *The Lancet Haematology* 2020; 7: e638-e639.
7. Zafar SY. Financial Toxicity of Cancer Care: It's Time to Intervene. *J Natl Cancer Inst* 2016; 108.
8. Riva S, Bryce J, De Lorenzo F et al. Development and validation of a patient-reported outcome tool to assess cancer-related financial toxicity in Italy: a protocol. *BMJ Open* 2019; 9: e031485.
9. Riva S, Efficace F, Di Maio M et al. A qualitative analysis and development of a conceptual model assessing financial toxicity in cancer patients accessing the universal healthcare system. *Support Care Cancer* 2020.
10. Patrick DL, Burke LB, Gwaltney CJ et al. Content validity--establishing and reporting the evidence in newly developed patient-reported outcomes (PRO) instruments for medical product evaluation: ISPOR PRO Good Research Practices Task Force report: part 2--assessing respondent understanding. *Value Health* 2011; 14: 978-988.
11. Patrick DL, Burke LB, Gwaltney CJ et al. Content validity--establishing and reporting the evidence in newly developed patient-reported outcomes (PRO) instruments for medical product evaluation: ISPOR PRO good research practices task force report: part 1--eliciting concepts for a new PRO instrument. *Value Health* 2011; 14: 967-977.
12. Fayers PM, Machin D. *Quality of Life: Assessment, Analysis and Interpretation*. 2000.
13. Floyd FJ, Widaman KF. Factor analysis in the development and refinement of clinical assessment instruments. *Psychological Assessment* 1995; 7: 286-299.
14. Fabrigar LR, Wegener DT. *Exploratory Factor Analysis*. 2012.
15. Wild D, Grove A, Martin M et al. Principles of Good Practice for the Translation and Cultural Adaptation Process for Patient-Reported Outcomes (PRO) Measures: report of the ISPOR Task Force for Translation and Cultural Adaptation. *Value Health* 2005; 8: 94-104.
16. Lathan CS, Cronin A, Tucker-Seeley R et al. Association of Financial Strain With Symptom Burden and Quality of Life for Patients With Lung or Colorectal Cancer. *J Clin Oncol* 2016; 34: 1732-1740.
17. Ramsey SD, Bansal A, Fedorenko CR et al. Financial Insolvency as a Risk Factor for Early Mortality Among Patients With Cancer. *J Clin Oncol* 2016; 34: 980-986.
18. Ramsey SD, Lyman GH, Bangs R. Addressing Skyrocketing Cancer Drug Prices Comes With Tradeoffs: Pick Your Poison. *JAMA Oncology* 2016; 2: 425-426.
19. Armeni PB, A.; Borsoi, L.; Costa, F. . La spesa sanitaria: composizione ed evoluzione. In (ed.) CB (ed) *Rapporto Oasi* 2020. Milano: Egea 2020.
20. Perrone F, Di Maio M, Efficace F et al. Assessing Financial Toxicity in Patients With Cancer: Moving Away From a One-Size-Fits-All Approach. *J Oncol Pract* 2019; JOP1900200.
21. Rotter J, Spencer JC, Wheeler SB. Financial Toxicity in Advanced and Metastatic Cancer: Overburdened and Underprepared. *J Oncol Pract* 2019; JOP1800518.

1  
2  
3  
4  
5  
6  
7  
8  
9  
10  
11  
12  
13  
14  
15  
16  
17  
18  
19  
20  
21  
22  
23  
24  
25  
26  
27  
28  
29  
30  
31  
32  
33  
34  
35  
36  
37  
38  
39  
40  
41  
42  
43  
44  
45  
46  
47  
48  
49  
50  
51  
52  
53  
54  
55  
56  
57  
58  
59  
60

22. Donatini A. The Italian health Care system. In Tikkanen RO, R.; Mossialos, E.; Djordjevic, A.; Wharton, G. (ed). (ed) The 2020 International Profiles of Health Care Systems: A Useful Resource for Interpreting Country Responses to the COVID-19 Pandemic 2020.
23. Del Vecchio MF, L.; Preti, L.M.; Rappini, R. I consumi privati in sanità. . In Bocconi C (ed) Rapporto Oasi 2020. Milano: Egea 2020.
24. De Lorenzo FT, F.; Del Campo, L.; Iannelli, E.; Pero, D.; Beretta G.; Sproviero, A.; Carelli, S.; Sant, M.; Lillini, R.; Baili, P.; Perrone, F.; Pugliese, P.; Collicelli, C. Indagine sui costi sociali ed economici del cancro nel 2018. In Oncologia FFIdAdVi (ed) 11° Rapporto sulla condizione assistenziale dei malati oncologici. 2018.
25. de Souza JA, Yap BJ, Hlubocky FJ et al. The development of a financial toxicity patient-reported outcome in cancer: The COST measure. *Cancer* 2014; 120: 3245-3253.
26. de Souza JA, Yap BJ, Wroblewski K et al. Measuring financial toxicity as a clinically relevant patient-reported outcome: The validation of the COmprehensive Score for financial Toxicity (COST). *Cancer* 2017; 123: 476-484.
27. Altice CK, Banegas MP, Tucker-Seeley RD, Yabroff KR. Financial Hardships Experienced by Cancer Survivors: A Systematic Review. *J Natl Cancer Inst* 2017; 109.

For peer review only

### Disclosures of conflicts of interest

SR has received personal fees from CSL-Behring and GlaxoSmithKline Foundation.

MDM has received personal fees from Bristol Myers Squibb, Merck Sharp & Dohme, Astra Zeneca, Janssen, Astellas, Pfizer, Eisai, Takeda.

FE has received personal fees from AbbVie, BMS, Amgen, Orsenix, Takeda and research grant (Institution) from Amgen.

VM has received personal fees from Bristol Myers Squibb and Italfarmaco; a member of his family is employee in Bayer.

CJ has received personal fees from Amgen, Astra Zeneca, Biogen, Boehringer Ingelheim, Celgene, Gilead, GSK, Ipsen, Janssen-Cilag, Takeda and Sanofi.

CMV has received personal fees from from Baxter, MSD, Novartis, Sanofi, Sanofi Genzyme.

CP acted as a Speaker and/or Consultant for MSD, BMS, AstraZeneca, Ipsen, Pfizer, Eisai, EUSA, Novartis, Merck, General Electrics and Angelini; furthermore, was an Expert Testimony for Pfizer and EUSA.

LDM has received personal fees from Eli Lilly, Roche, MSD, Novartis, Genomic Health, Pierre Fabre, Pfizer, Seattle Genetics, Daiichi Sankyo, Astra Zeneca, Ipsen, Eisai.

VZ has received personal fees from BMS, MSD, Eisai, Italfarmaco, Roche, Astellas Pharma, Servier, Astra Zeneca, MSD, Janssen, Ipsen and research grant (Institution) from Bayer, Roche, Eli Lilly, Astra Zeneca, BMS, Ipsen, Astellas.

RB reports personal fees from Bayer, Astra Zeneca, Sanofi, Novartis, Amgen, Hoffmann La Roche, Pfizer, Janssen Cilag, Bristol Myers Squibb, Merck.

1  
2  
3  
4  
5  
6  
7  
8  
9  
10  
11  
12  
13  
14  
15  
16  
17  
18  
19  
20  
21  
22  
23  
24  
25  
26  
27  
28  
29  
30  
31  
32  
33  
34  
35  
36  
37  
38  
39  
40  
41  
42  
43  
44  
45  
46  
47  
48  
49  
50  
51  
52  
53  
54  
55  
56  
57  
58  
59  
60

MCP reports personal fees from Daichii Sankyo, personal fees from GSK, personal fees from MSD, grants from Roche, grants and personal fees from AstraZeneca, non-financial support from Bayer.

FP has received personal fees from Bayer, Ipsen, Astra Zeneca, Bristol Myers Squibb, Sandoz, Incyte, Celgene, Pierre Fabre, Janssen-Cilag and research grants (Institution) from Astra Zeneca, Bayer, Roche, Merck, Pfizer, Incyte, Sanofi, BioClin, Tesaro. All the above disclosures are outside the submitted work.

The other Authors have no conflict to disclose.

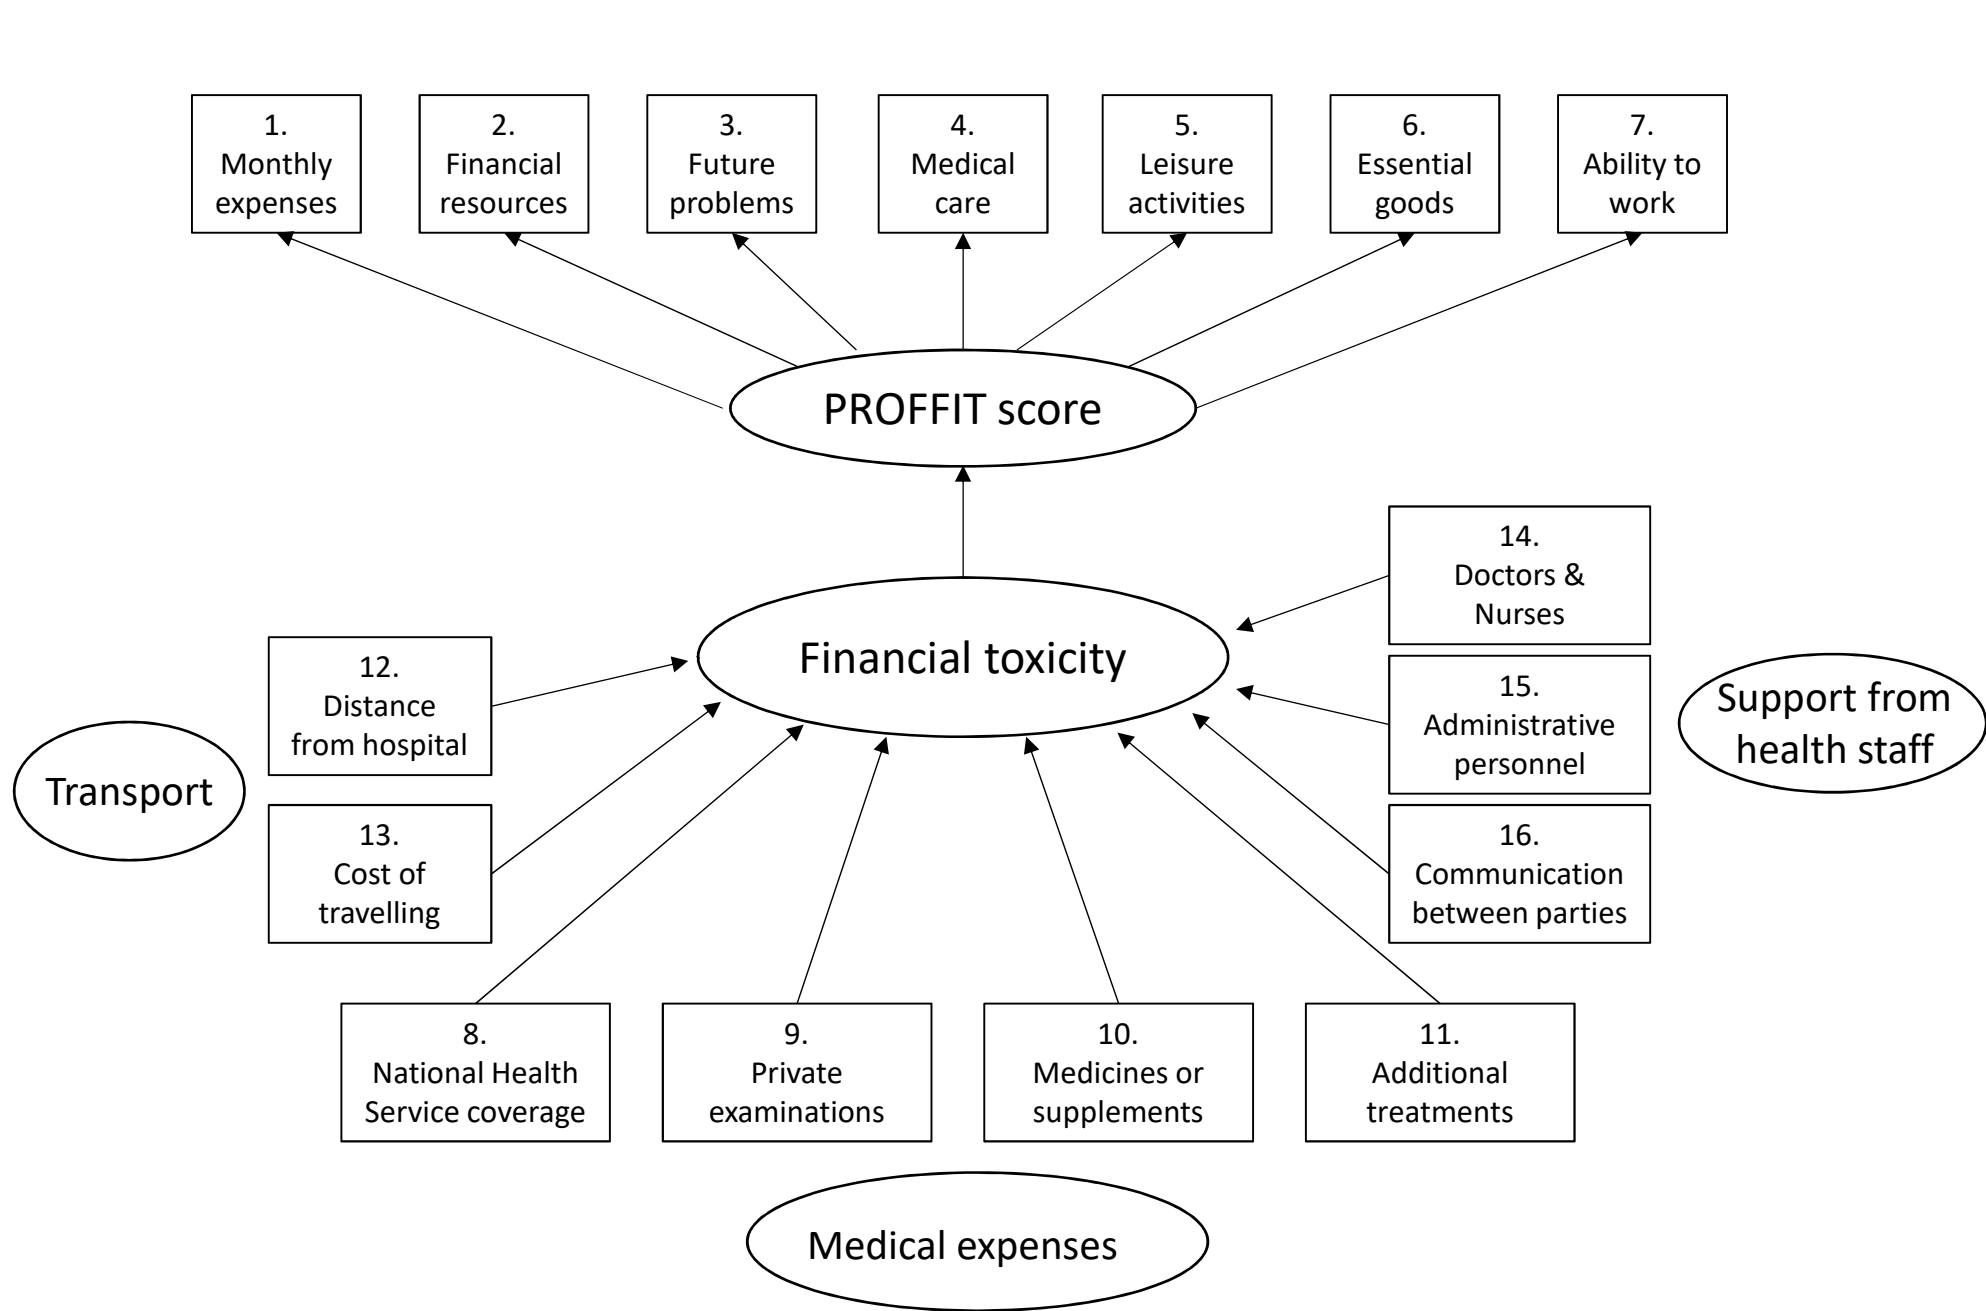

Figure 1.

1  
2  
3 **A cross-sectional study to develop and describe psychometric characteristics of a**  
4 **patient-reported instrument (PROFFIT) for measuring financial toxicity of cancer**  
5 **within a public healthcare system**  
6  
7  
8

9 **Appendix**  
10

11  
12  
13 **Index**

14  
15 Steering Committee and participating Investigators.....2  
16 Scoring procedure .....4  
17     Examples of calculation of FT score.....5  
18     Examples of calculation of single determinants scores .....6  
19 Table S1. List of items in the pre-final instrument .....7  
20 Questionnaire development .....8  
21 Table S2. Spearman correlation coefficients between items .....9  
22     Table S2a. Job items.....9  
23     Table S2b. All other items .....9  
24 Exploratory Factor Analysis (EFA).....10  
25     EFA on Outcome.....10  
26     EFA on Determinants .....13  
27 Convergent validity .....15  
28     Table S3. Spearman correlation coefficients between each item and total score\* .....15  
29 Repeatability .....16  
30 Table S4. Test-retest results .....16  
31 Table S5. Association of FT score with baseline characteristics of patients .....17  
32  
33  
34  
35  
36  
37  
38  
39  
40  
41  
42  
43  
44  
45  
46  
47  
48  
49  
50  
51  
52  
53  
54  
55  
56  
57  
58  
59  
60



## Steering Committee and participating Investigators

The PROFFIT Steering Committee includes: Francesco Perrone, Jane Bryce, Ciro Gallo, Silvia Riva, Fabio Efficace, Francesco De Lorenzo, Elisabetta Iannelli, Laura Del Campo, Francesca Traclò, Massimo Di Maio (also as representative of AIOM – Associazione Italiana di Oncologia Medica), Luciano Frontini, Vincenzo Montesarchio (also as representative of CIPOMO – Collegio Italiano dei Primari di Oncologia Medica Ospedalieri), Diana Giannarelli, Lara Gitto, Claudio Jommi, Concetta Maria Vaccaro.

We acknowledge the contribution of the other personnel working at the Unità Sperimentazioni Cliniche of the Istituto Nazionale per lo Studio e la Cura dei Tumori, IRCCS Fondazione Pascale of Napoli: Adriano Gravina, Clorinda Schettino, Piera Gargiulo, Lucia Sparavigna, Giuliana Canzanella, Fiorella Romano, Valentina Barbato, Manuela Florio, Simona Bevilacqua, Gaetano Buonfanti, Alfonso Savio, Antonia Del Giudice, Teresa Ribecco, Marilena Martino, Giovanni De Matteis.

The following personnel contributed to the project at the participating centers:

- Istituto Nazionale Tumori - IRCCS – Fondazione G.Pascale, Napoli: Daniela Barberio, Ermelinda Quarata, Maria Florencia Gonzalez Leone, Gessica Migliaccio, Francesca Laudato, Maria Rosaria Esposito
- AO Ordine Mauriziano - S.C.D.U Oncologia Medica, Torino: Gaetano Lacidogna, Elisa Sperti, Francesca Vignani, Donatella Marino, Sabrina Terzolo, Luisa Fusco, Annalisa Bellezza, Laura Polimeno
- UOS Biostatistica - Istituto Regina Elena, Roma (Diana Giannarelli, Filomena Spasiano, Luana Fotia, Barbara Matrasci)
- U.O.C. Oncologia Medica A.O. Garibaldi, Catania (Roberto Bordonaro, Stefano Cordio, Concetta Sergi, Fabrizio Castagna, Francesco Avola, Laura Longhitano, Desiree Caudullo)
- U.O.C. Oncologia Medica - Ospedale Senatore Antonio Perrino, Brindisi (Saverio Cinieri, Manuela Caloro, Laura Orlando, Dario Loparco)
- Oncologia Medica 2 - IRCCS AOU San Martino - IST, Genova (Lucia Del Mastro)
- AO Ordine Mauriziano - S.C.D.U Oncologia Medica, Torino (Massimo Di Maio)
- U.O.C. Oncologia - Presidio Monaldi - AORN dei Colli, Napoli (Vincenzo Montesarchio, Giusy Petrillo)

- Unità operativa complessa di Oncologia Medica - AOU di Sassari (Antonio Pazzola, Alessio Aligi Cogoni)
- Oncologia traslazionale – I.R.C.C.S. Istituti Clinici Scientifici Maugeri, Pavia (Camillo Porta)
- U.O.C. Oncologia 1, Istituto Oncologico Veneto, IOV, IRCCS Padova (Vittorina Zagonel, Eleonora Bergo).

Italian to English translation was done thank to the voluntary contribution of Iain Halliday, Salvo Ciancitto, and Francesca Vigo (University of Catania, Dipartimento di Scienze Umanistiche), and Daniel Matheson (freelance translator).

A graphic logo (see below) has been created thanks to the voluntary contribution of Valeria Lepore, Pierpaola Borzacchiello, and Carla Langella (director), Design per la Valorizzazione Scientifica, Università della Campania Luigi Vanvitelli.

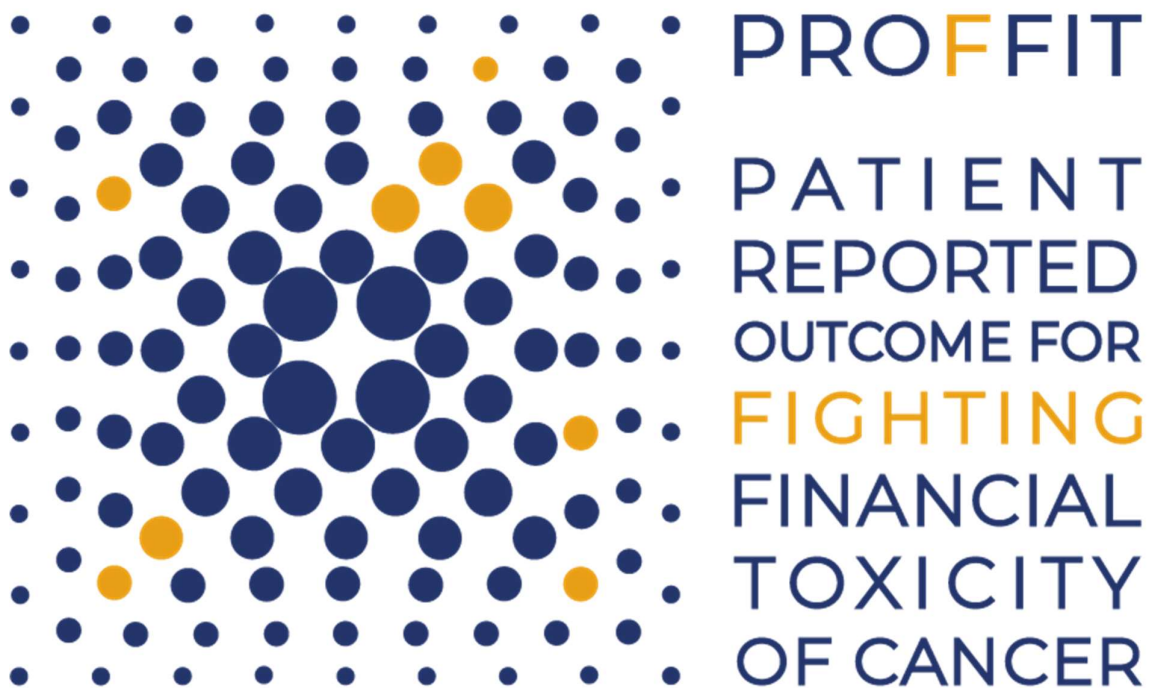

## Scoring procedure

Responses to PROFFIT items are coded in four categories of agreement with the statement of each item, scoring from 1 to 4:

1 - I do not agree at all, 2 - I agree partially, 3 - I agree substantially, 4 - I very much agree.

PROFFIT results are reported as a FT-score (including items #1 to #7) and nine separate items for FT determinants. All the scores are normalised to 0-100%, where 100 indicates the highest toxicity.

For **calculation of the FT-score**, including items #1 to #7, the following steps should be followed:

- Reverse the score for Item #1 according to the following formula

$$X_{1-reverse} = 5 - X_1$$

where  $X_1$  is the response given to item #1.

- Calculate the FT-score according to the following formula

$$\frac{X_{1-reverse} + X_2 + X_3 + X_4 + X_5 + X_6 + X_7 - Y}{3 \times Y} \times 100$$

where  $X$  is the response given for each item and  $Y$  is the number of items with valid response; if  $Y$  is 3 or less the score should be considered missing. At least 4 valid responses are needed to calculate the FT-score.

## Examples of calculation of FT score

| Item: response                                                                                                                                                                                                          | Intermediate                | Final FT score                                                     |
|-------------------------------------------------------------------------------------------------------------------------------------------------------------------------------------------------------------------------|-----------------------------|--------------------------------------------------------------------|
| Example 1                                                                                                                                                                                                               |                             |                                                                    |
| #1: I very much agree (4)<br>#2: I agree partially (2)<br>#3: I agree substantially (3)<br>#4: I do not agree at all (1)<br>#5: I agree partially (2)<br>#6: I agree substantially (3)<br>#7: I do not agree at all (1) | $X_{1-reverse} = 5 - 4 = 1$ | $\frac{1 + 2 + 3 + 1 + 2 + 3 + 1 - 7}{3 \times 7} \times 100 = 38$ |
| Example 2.                                                                                                                                                                                                              |                             |                                                                    |
| #1: I do not agree at all (1)<br>#2: I very much agree (4)<br>#3: I agree substantially (3)<br>#4: I agree substantially (3)<br>#5: I do not agree at all (1)<br>#6: I agree partially (2)<br>#7: MISSING               | $X_{1-reverse} = 5 - 1 = 4$ | $\frac{4 + 4 + 3 + 3 + 1 + 2 - 6}{3 \times 6} \times 100 = 61$     |

For calculation of the score for items #8, #12, #14, #15 and #16 use the following formula

$$\frac{4 - X_j}{3} \times 100$$

where X is the response given and j is the item (8, 12, 15, or 16).

For calculation of the score for items #9, #10, #11, #13 use the following formula

$$\frac{X_j - 1}{3} \times 100$$

where X is the response given and j is the item (9, 10, 11 or 13).

### Examples of calculation of single determinants scores

| Item: response                 | Final single score               |
|--------------------------------|----------------------------------|
| Example 3.                     |                                  |
| #8: I do not agree at all (1)  | $\frac{4-1}{3} \times 100 = 100$ |
| #14: I agree substantially (3) | $\frac{4-3}{3} \times 100 = 33$  |
| Example 4.                     |                                  |
| #9: I very much agree (4)      | $\frac{4-1}{3} \times 100 = 100$ |
| #13: I agree partially (2)     | $\frac{2-1}{3} \times 100 = 33$  |

Table S1. List of items in the pre-final instrument

| <i>Item ID in the pre-final instrument</i> | <i>Item ID in the final instrument</i> | <i>Item</i>                                                                                                                                       |
|--------------------------------------------|----------------------------------------|---------------------------------------------------------------------------------------------------------------------------------------------------|
| Q1                                         |                                        | Ho rapidamente trovato la struttura dove curarmi                                                                                                  |
| Q2                                         |                                        | Il tempo necessario per la diagnosi è stato breve                                                                                                 |
| Q5                                         |                                        | Ho sentito molto il peso della burocrazia (ad esempio per prenotare visite o per usufruire di benefici assistenziali, previdenziali e lavorativi) |
| Q26                                        | 10                                     | Ho sostenuto spese per farmaci supplementari o integratori per la mia malattia                                                                    |
| Q27                                        | 9                                      | Ho sostenuto spese per una o più visite private per la mia malattia                                                                               |
| Q28                                        | 11                                     | Devo sostenere spese per cure integrative a mio carico (es. fisioterapia, psicoterapia, cure odontoiatriche)                                      |
| Q49                                        | 8                                      | Il Servizio Sanitario Nazionale copre tutti i costi sanitari associati alla mia malattia                                                          |
| Q68                                        | 1                                      | Sono in grado di sostenere le mie spese mensili senza difficoltà (ad esempio per affitto, elettricità, telefono...)                               |
| Q76                                        | 3                                      | Sono preoccupata/o dei problemi economici che potrei avere in futuro a causa della malattia                                                       |
| Q85                                        | 2                                      | La mia malattia ha ridotto le mie disponibilità economiche                                                                                        |
| Q86                                        | 4                                      | La mia condizione economica incide sulle mie possibilità di curarmi                                                                               |
| Q90                                        |                                        | I miei problemi economici mi preoccupano                                                                                                          |
| Q95                                        |                                        | La mia famiglia ha dovuto sostenere i costi di trasporto, vitto e alloggio per curarmi in una città diversa da quella in cui vivo                 |
| Q99                                        | 7                                      | Sono preoccupata/o di non riuscire a lavorare a causa della malattia                                                                              |
| Q102                                       |                                        | Ho perso molti giorni lavorativi a causa della mia malattia                                                                                       |
| Q103                                       |                                        | Non riesco a guadagnare come prima per via della mia malattia                                                                                     |
| Q106                                       |                                        | Ho dovuto smettere di lavorare a causa della mia malattia                                                                                         |
| Q107                                       |                                        | Ho ridotto le ore al lavoro a causa della mia malattia                                                                                            |
| Q111                                       | 14                                     | Il personale sanitario (cioè medici, infermieri, etc.) ha agevolato il percorso di cura                                                           |
| Q112                                       | 15                                     | Il personale ospedaliero amministrativo (cioè centro di prenotazione, segreterie, etc.) ha agevolato il percorso di cura                          |
| Q113                                       | 16                                     | C'è stata comunicazione tra i medici e le strutture sanitarie che mi seguono                                                                      |
| Q114                                       |                                        | Il medico di famiglia ha agevolato il percorso di cura                                                                                            |
| Q121                                       | 5                                      | Ho ridotto le spese per attività ricreative come vacanze, ristoranti o spettacoli per affrontare le spese della mia malattia                      |
| Q122                                       | 6                                      | Ho ridotto le spese per acquisti essenziali (ad esempio il cibo) per affrontare le spese per la mia malattia                                      |
| Q138                                       |                                        | I servizi di trasporto per raggiungere l'ospedale (mezzi pubblici, parcheggi) sono scarsi                                                         |
| Q139                                       |                                        | Ho dovuto sostenere i costi di trasporto, vitto e alloggio per curarmi in una città diversa da quella in cui vivo                                 |
| Q140                                       | 13                                     | Ho dovuto sostenere rilevanti costi di trasporto per curarmi                                                                                      |
| Q141                                       | 12                                     | Il centro di cura è lontano dalla mia abitazione                                                                                                  |
| Q151                                       |                                        | È stato facile ottenere le agevolazioni economiche a cui ho diritto (ad esempio esenzione dal ticket, assegni o pensioni di invalidità)           |
| Q156                                       |                                        | So che la mia malattia mi dà diritto ad agevolazioni economiche (ad esempio esenzione dal ticket, assegni o pensioni di invalidità)               |

## Questionnaire development

The first step of the analysis was estimating the between-item correlation matrix. Because of the ordinal nature of the items the pairwise Spearman rank correlation coefficients ( $r_s$ ) were used.

We ascertained that there were about a third (68/184, 37%) of missing responses for the five job items from patients, who declared themselves retired or jobless (i.e.

househusbands, housewives or individuals in search of employment); thus we decided to estimate two separate bivariate correlation matrices, one limited to job items, where only the 116 cases without missing information were used (**Table S2a below**), and one for all the other items, where the complete sample of 184 cases was used (**Table S2b below**).

For every pair, whose  $r_s > 0.65$ , the item with the greater score in the previously published importance analysis was retained.

At the end of this preliminary analysis, six items (Q103, Q106, Q107, Q90, Q95, Q139) were excluded, because  $r_s$  was greater than 0.65, leading to 9 outcome and 15 determinant items for subsequent analyses. Out of the five job items, two were retained, one outcome (Q99) and one determinant (Q102).

Table S2. Spearman correlation coefficients between items

Table S2a. Job items

|      | Q99  | Q102 | Q103 | Q106 | Q107 |
|------|------|------|------|------|------|
| Q99  | 1    |      |      |      |      |
| Q102 | 0,63 | 1    |      |      |      |
| Q103 | 0,72 | 0,66 | 1    |      |      |
| Q106 | 0,55 | 0,50 | 0,60 | 1    |      |
| Q107 | 0,56 | 0,67 | 0,67 | 0,78 | 1    |

Table S2b. All other items

|      | Q1    | Q2    | Q5    | Q26   | Q27   | Q28   | Q49   | Q68   | Q76   | Q85   | Q86   | Q90   | Q95   | Q111  | Q112  | Q113  | Q114  | Q121  | Q122  | Q138  | Q139  | Q140  | Q141  | Q151 | Q156 |
|------|-------|-------|-------|-------|-------|-------|-------|-------|-------|-------|-------|-------|-------|-------|-------|-------|-------|-------|-------|-------|-------|-------|-------|------|------|
| Q1   | 1     |       |       |       |       |       |       |       |       |       |       |       |       |       |       |       |       |       |       |       |       |       |       |      |      |
| Q2   | 0,29  | 1     |       |       |       |       |       |       |       |       |       |       |       |       |       |       |       |       |       |       |       |       |       |      |      |
| Q5   | -0,08 | -0,05 | 1     |       |       |       |       |       |       |       |       |       |       |       |       |       |       |       |       |       |       |       |       |      |      |
| Q26  | -0,18 | -0,13 | 0,22  | 1     |       |       |       |       |       |       |       |       |       |       |       |       |       |       |       |       |       |       |       |      |      |
| Q27  | -0,16 | -0,04 | 0,33  | 0,30  | 1     |       |       |       |       |       |       |       |       |       |       |       |       |       |       |       |       |       |       |      |      |
| Q28  | -0,07 | -0,03 | 0,40  | 0,36  | 0,40  | 1     |       |       |       |       |       |       |       |       |       |       |       |       |       |       |       |       |       |      |      |
| Q49  | 0,18  | 0,15  | -0,23 | -0,46 | -0,27 | -0,41 | 1     |       |       |       |       |       |       |       |       |       |       |       |       |       |       |       |       |      |      |
| Q68  | 0,09  | 0,15  | -0,03 | -0,25 | -0,09 | -0,13 | 0,34  | 1     |       |       |       |       |       |       |       |       |       |       |       |       |       |       |       |      |      |
| Q76  | -0,22 | -0,10 | 0,21  | 0,41  | 0,29  | 0,29  | -0,32 | -0,45 | 1     |       |       |       |       |       |       |       |       |       |       |       |       |       |       |      |      |
| Q85  | -0,18 | -0,04 | 0,27  | 0,46  | 0,31  | 0,37  | -0,41 | -0,41 | 0,65  | 1     |       |       |       |       |       |       |       |       |       |       |       |       |       |      |      |
| Q86  | -0,24 | -0,11 | 0,27  | 0,40  | 0,39  | 0,34  | -0,46 | -0,44 | 0,56  | 0,57  | 1     |       |       |       |       |       |       |       |       |       |       |       |       |      |      |
| Q90  | -0,21 | -0,15 | 0,16  | 0,34  | 0,22  | 0,26  | -0,29 | -0,53 | 0,71  | 0,67  | 0,70  | 1     |       |       |       |       |       |       |       |       |       |       |       |      |      |
| Q95  | -0,23 | -0,10 | 0,19  | 0,25  | 0,29  | 0,30  | -0,23 | -0,12 | 0,20  | 0,33  | 0,28  | 0,21  | 1     |       |       |       |       |       |       |       |       |       |       |      |      |
| Q111 | 0,35  | 0,25  | -0,26 | -0,26 | -0,30 | -0,29 | 0,38  | 0,14  | -0,11 | -0,17 | -0,31 | -0,13 | -0,17 | 1     |       |       |       |       |       |       |       |       |       |      |      |
| Q112 | 0,25  | 0,10  | -0,12 | -0,20 | -0,15 | -0,16 | 0,41  | 0,10  | -0,17 | -0,18 | -0,31 | -0,14 | -0,10 | 0,53  | 1     |       |       |       |       |       |       |       |       |      |      |
| Q113 | 0,21  | 0,13  | -0,20 | -0,05 | -0,45 | -0,22 | 0,22  | 0,00  | -0,11 | -0,07 | -0,22 | -0,15 | -0,11 | 0,43  | 0,33  | 1     |       |       |       |       |       |       |       |      |      |
| Q114 | 0,15  | 0,09  | -0,23 | -0,10 | -0,17 | -0,24 | 0,12  | 0,25  | -0,24 | -0,12 | -0,24 | -0,24 | 0,02  | 0,37  | 0,38  | 0,28  | 1     |       |       |       |       |       |       |      |      |
| Q121 | -0,21 | -0,15 | 0,12  | 0,31  | 0,36  | 0,28  | -0,21 | -0,41 | 0,57  | 0,59  | 0,48  | 0,62  | 0,28  | -0,06 | -0,09 | -0,17 | -0,10 | 1     |       |       |       |       |       |      |      |
| Q122 | -0,08 | -0,09 | 0,09  | 0,36  | 0,25  | 0,31  | -0,37 | -0,47 | 0,48  | 0,49  | 0,64  | 0,66  | 0,33  | -0,15 | -0,17 | -0,15 | -0,10 | 0,57  | 1     |       |       |       |       |      |      |
| Q138 | -0,08 | -0,05 | 0,28  | 0,25  | 0,22  | 0,27  | -0,30 | -0,17 | 0,24  | 0,34  | 0,31  | 0,31  | 0,08  | -0,24 | -0,23 | -0,03 | -0,15 | 0,18  | 0,34  | 1     |       |       |       |      |      |
| Q139 | -0,23 | -0,02 | 0,18  | 0,28  | 0,33  | 0,36  | -0,25 | -0,19 | 0,26  | 0,36  | 0,34  | 0,23  | 0,69  | -0,14 | -0,10 | -0,07 | -0,02 | 0,30  | 0,42  | 0,15  | 1     |       |       |      |      |
| Q140 | -0,17 | -0,04 | 0,27  | 0,30  | 0,33  | 0,29  | -0,27 | -0,21 | 0,28  | 0,41  | 0,33  | 0,31  | 0,59  | -0,20 | -0,10 | -0,02 | -0,04 | 0,38  | 0,45  | 0,27  | 0,66  | 1     |       |      |      |
| Q141 | -0,14 | 0,02  | 0,16  | 0,09  | 0,11  | 0,10  | -0,02 | -0,08 | 0,11  | 0,18  | 0,12  | 0,12  | 0,34  | -0,04 | 0,04  | 0,05  | -0,13 | 0,10  | 0,18  | 0,11  | 0,45  | 0,55  | 1     |      |      |
| Q151 | 0,10  | 0,11  | -0,15 | -0,21 | -0,15 | -0,11 | 0,27  | 0,24  | -0,20 | -0,29 | -0,29 | -0,24 | -0,09 | 0,18  | 0,20  | 0,17  | 0,20  | -0,22 | -0,21 | -0,10 | -0,18 | -0,18 | -0,07 | 1    |      |
| Q156 | 0,15  | 0,27  | -0,02 | -0,14 | -0,03 | -0,07 | 0,33  | 0,39  | -0,18 | -0,22 | -0,32 | -0,25 | -0,07 | 0,22  | 0,23  | 0,20  | 0,18  | -0,15 | -0,32 | -0,22 | -0,13 | -0,08 | 0,01  | 0,35 | 1    |



## Exploratory Factor Analysis (EFA)

### EFA on Outcome

EFA on the 9-outcome correlation matrix was performed by Principal Axis Factor (PAF) extraction option of SPSS, with VARIMAX rotation, in the sample of 116 subjects with complete information, because of the presence of the job item Q99.

The items considered at the start were Q5, Q68, Q76, Q85, Q86, Q99, Q121, Q122, Q151.

In the initial factor solution, three factors met the Kaiser criterion of eigenvalue  $>1$  and accounted for 66% of the variance, the first axis alone explaining 41% of the total variance (see Table and scree plot below).

| Factor | Total | % of variance | Cumulative % |
|--------|-------|---------------|--------------|
| 1      | 3.645 | 40.501        | 40.501       |
| 2      | 1.185 | 13.163        | 53.665       |
| 3      | 1.079 | 11.986        | 65.651       |
| 4      | 0.819 | 9.105         | 74.756       |
| 5      | 0.656 | 7.286         | 82.042       |
| 6      | 0.533 | 5.927         | 87.969       |
| 7      | 0.492 | 5.470         | 93.439       |
| 8      | 0.304 | 3.383         | 96.821       |
| 9      | 0.286 | 3.179         | 100.000      |

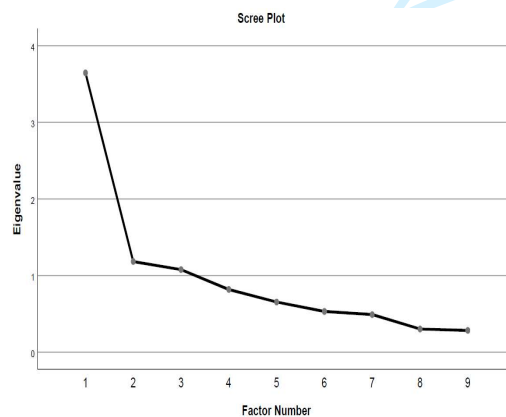

Communalities and unrotated factor loadings are reported in the table below.

|             | Communalities |            | Factor |        |        |
|-------------|---------------|------------|--------|--------|--------|
|             | Initial       | Extraction | 1      | 2      | 3      |
| <b>Q5</b>   | 0.133         | 0.31       | 0.261  | 0.203  | -0.448 |
| <b>Q68</b>  | 0.233         | 0.266      | -0.452 | 0.248  | -0.020 |
| <b>Q76</b>  | 0.574         | 0.653      | 0.793  | 0.152  | -0.027 |
| <b>Q85</b>  | 0.605         | 0.729      | 0.819  | 0.238  | 0.034  |
| <b>Q86</b>  | 0.510         | 0.677      | 0.723  | -0.305 | -0.248 |
| <b>Q99</b>  | 0.248         | 0.344      | 0.424  | 0.387  | 0.119  |
| <b>Q121</b> | 0.471         | 0.593      | 0.704  | 0.118  | 0.290  |
| <b>Q122</b> | 0.437         | 0.623      | 0.630  | -0.458 | 0.131  |
| <b>Q151</b> | 0.089         | 0.116      | -0.265 | -0.018 | 0.214  |

The item Q151 shows communality <0.20, Child 2006), and factor loadings <0.3 (Field, 2013) with all three factors, and was removed from further analyses.

Analogously at the next step the item Q5 was removed (communality = 0.072).

Eventually, seven items were retained with two factors meeting the Kaiser criterion of eigenvalue >1.

Communalities and factor loadings after Varimax rotation in the reduced sample of 116 patients are reported below. Many items cross loaded on both axes, that seemed both expression of financial burden: after rotation, the first one was more correlated with items mirroring an actual severe burden (Q86, Q122), while the second one appeared more correlated with worries about the future.

|             | Communalities |            | Factor |        |
|-------------|---------------|------------|--------|--------|
|             | Initial       | Extraction | 1      | 2      |
| <b>Q68</b>  | 0.222         | 0.269      | -0.498 | -0.145 |
| <b>Q76</b>  | 0.570         | 0.648      | 0.468  | 0.655  |
| <b>Q85</b>  | 0.600         | 0.737      | 0.413  | 0.753  |
| <b>Q86</b>  | 0.491         | 0.588      | 0.719  | 0.266  |
| <b>Q99</b>  | 0.247         | 0.356      | 0.012  | 0.596  |
| <b>Q121</b> | 0.470         | 0.510      | 0.397  | 0.594  |
| <b>Q122</b> | 0.426         | 0.566      | 0.735  | 0.159  |

The previous interpretation might imply that some correlation between axes would be expected. Thus, the oblique Promax rotation was applied. The same seven-item final solution was found with two factors meeting the Kaiser criterion of eigenvalue >1, and findings were reinforced. The factor loadings with Promax rotation are reported below.

|             | <b>Factor</b> |          |
|-------------|---------------|----------|
|             | <b>1</b>      | <b>2</b> |
| <b>Q68</b>  | -0.549        | 0.047    |
| <b>Q76</b>  | 0.248         | 0.616    |
| <b>Q85</b>  | 0.129         | 0.766    |
| <b>Q86</b>  | 0.764         | 0.004    |
| <b>Q99</b>  | -0.292        | 0.753    |
| <b>Q121</b> | 0.191         | 0.571    |
| <b>Q122</b> | 0.839         | -0.140   |

The same analysis was repeated in the whole sample, replacing the missing information on the Q99 job in the 68 cases with the average score of the other items. We did that, according to the protocol, for both increasing the power of the analysis and as a sensitivity analysis of findings in the restricted sample. We chose to input the average score rather than the minimum score (that would sound *I am not worried at all that I will not be able to work due to my illness*) because it could be true for retired people (at least in the Italian population), but not for younger people without job. We think, indeed, that imputing the minimum score would definitely bias the score toward the null, while imputing the average could possibly only slightly overestimate the financial issues. Further, this choice is consistent with the calculus of the score, where the missing items are not considered in the denominator. This question will be further dealt with in the next validation steps. In the full sample similar and stronger results were found: items Q151 and Q5 were removed because of low communalities (both <0.10). With the eventual 7-item analysis only the first axis met the Kaiser criterion of eigenvalue >1. Communalities and factor loadings in the complete sample are reported below. With one factor extracted no rotation was needed.

|             | <b>Communalities</b> |                   | <b>Factor</b> |
|-------------|----------------------|-------------------|---------------|
|             | <b>Initial</b>       | <b>Extraction</b> |               |
| <b>Q68</b>  | 0.309                | 0.309             | -0.556        |
| <b>Q76</b>  | 0.555                | 0.622             | 0.788         |
| <b>Q85</b>  | 0.582                | 0.647             | 0.805         |
| <b>Q86</b>  | 0.534                | 0.547             | 0.739         |
| <b>Q99</b>  | 0.318                | 0.273             | 0.522         |
| <b>Q121</b> | 0.494                | 0.537             | 0.733         |
| <b>Q122</b> | 0.506                | 0.485             | 0.697         |

Therefore, the PROFFIT FT-score includes 7 outcome items.

## EFA on Determinants

EFA on the 15-outcome correlation matrix was performed by Principal Axis Factor (PAF) extraction option of SPSS, with VARIMAX rotation, in the sample of 116 subjects with complete information, because of the presence of the job item Q102.

The items considered at the start were Q1, Q2, Q26, Q27, Q28, Q49, Q102, Q111, Q112, Q113, Q114, Q138, Q140, Q141, Q156. In principle, the 15 determinants could be expression of three categories: (i) direct medical expenses (Q26, Q27, Q28, Q49), (ii) indirect costs due to travelling needs for medical care (Q138, Q140, Q141), (iii) indirect costs due to bureaucracy (Q1, Q2, Q111, Q112, Q113, Q114, Q156), plus a single job item (Q102).

In the initial factor solution, five factors met the Kaiser criterion of eigenvalue >1 and accounted for 62% of the variance (Table below), but the first axis explained only the 26% of the total variance.

| Factor | Total | % of variance | Cumulative % |
|--------|-------|---------------|--------------|
| 1      | 3.869 | 25.793        | 25.793       |
| 2      | 1.851 | 12.341        | 38.133       |
| 3      | 1.403 | 9.356         | 47.490       |
| 4      | 1.135 | 7.567         | 55.057       |
| 5      | 1.041 | 6.943         | 62.000       |
| 6      | 0.975 | 6.502         | 68.503       |
| 7      | 0.825 | 5.501         | 74.004       |
| 8      | 0.766 | 5.104         | 79.107       |
| 9      | 0.664 | 4.425         | 83.532       |
| 10     | 0.583 | 3.885         | 87.417       |
| 11     | 0.554 | 3.696         | 91.113       |
| 12     | 0.416 | 2.774         | 93.887       |
| 13     | 0.364 | 2.426         | 96.313       |
| 14     | 0.326 | 2.171         | 98.484       |
| 15     | 0.227 | 1.516         | 100.000      |

The job item Q102 had the smallest communality (0.183) and was removed. All the other items had complete responses, thus it seemed meaningless to continue in the restricted sample, and the subsequent analysis was only performed in the complete sample, where all of the responses were available.

The initial factor solution with 14 items in the full sample is reported below. Almost nothing changed: five factors met the Kaiser criterion of eigenvalue >1 and accounted for 63% of the variance, and the first axis explained only the 26% of the total variance.

| Factor | Total | % of variance | Cumulative % |
|--------|-------|---------------|--------------|
| 1      | 3.571 | 25.508        | 25.508       |
| 2      | 1.712 | 12.232        | 37.740       |
| 3      | 1.290 | 9.211         | 46.951       |
| 4      | 1.223 | 8.733         | 55.684       |
| 5      | 1.078 | 7.703         | 63.387       |
| 6      | 0.869 | 6.207         | 69.594       |
| 7      | 0.776 | 5.543         | 75.136       |
| 8      | 0.735 | 5.253         | 80.389       |
| 9      | 0.649 | 4.635         | 85.023       |
| 10     | 0.554 | 3.954         | 88.978       |
| 11     | 0.451 | 3.219         | 92.197       |
| 12     | 0.413 | 2.949         | 95.146       |
| 13     | 0.373 | 2.662         | 97.808       |
| 14     | 0.307 | 2.192         | 100.000      |

At the next steps items Q1, Q2, Q156, Q138 and Q114 were removed in turn because of small communalities, leading to the final solution with nine items and four factors retained. Communalities and factor loadings in the complete sample are reported below.

|      | Communalities |            | Factor |        |        |        |
|------|---------------|------------|--------|--------|--------|--------|
|      | Initial       | Extraction | 1      | 2      | 3      | 4      |
| Q26  | 0.305         | 0.425      | 0.628  | -0.113 | 0.124  | 0.050  |
| Q27  | 0.374         | 0.597      | 0.350  | 0.010  | 0.183  | 0.664  |
| Q28  | 0.335         | 0.453      | 0.604  | -0.048 | 0.137  | 0.259  |
| Q49  | 0.393         | 0.576      | -0.660 | 0.372  | -0.012 | -0.045 |
| Q111 | 0.369         | 0.487      | -0.210 | 0.592  | -0.081 | -0.294 |
| Q112 | 0.333         | 0.610      | -0.144 | 0.765  | 0.039  | -0.049 |
| Q113 | 0.319         | 0.556      | 0.001  | 0.332  | 0.059  | -0.665 |
| Q140 | 0.426         | 0.741      | 0.283  | -0.069 | 0.803  | 0.105  |
| Q141 | 0.316         | 0.449      | 0.009  | 0.033  | 0.669  | 0.005  |

Seemingly the first axis is related to direct medical expenses, the second axis to health bureaucracy items and the third axis to travelling costs, but some cross load on the factors is present.

Therefore we decided to retain the nine determinant items as single items in the final questionnaire.

## Convergent validity

We said above that the PROFFIT FT-score includes 7 outcome items. In the table below correlation between each item and the total score of the scale, removing that item from the sum (convergent validity), is reported. Correlations are quite good, all  $r_s$  being greater than 0.5 in the full sample.

Table S3. Spearman correlation coefficients between each item and total score\*

| Item number | Full sample (N=184) | Restricted sample (N=116) |
|-------------|---------------------|---------------------------|
| 1           | 0.5325              | 0.5243                    |
| 2           | 0.7360              | 0.7267                    |
| 3           | 0.7251              | 0.7158                    |
| 4           | 0.6646              | 0.6559                    |
| 5           | 0.6887              | 0.6765                    |
| 6           | 0.6712              | 0.6626                    |
| 7           | 0.5537              | 0.3684                    |

\*calculated removing each item from the sum

## Repeatability

Agreement between repeated measurements was assessed by intra-class correlation coefficient (ICC) and weighted Cohen's Kappa coefficient. Scores were stable enough over time, with ICCs ranging from 0.56 and 0.79. ICC was equal to 0.81 for the FT-score.

Table S4. Test-retest results

|                          | ICC         | Weighted K  | Agreement % |
|--------------------------|-------------|-------------|-------------|
| <b>Outcome items</b>     |             |             |             |
| Item 1                   | 0.70        | 0.70        | 95.7        |
| Item 2                   | 0.68        | 0.68        | 93.7        |
| Item 3                   | 0.56        | 0.56        | 90.7        |
| Item 4                   | 0.64        | 0.64        | 93.2        |
| Item 5                   | 0.65        | 0.65        | 91.0        |
| Item 6                   | 0.65        | 0.65        | 93.9        |
| Item 7                   | 0.79        | 0.81        | 94.4        |
| <b>FT-score</b>          | <b>0.81</b> | <b>0.82</b> | <b>97.4</b> |
| <b>Determinant items</b> |             |             |             |
| Item 8                   | 0.61        | 0.61        | 94.4        |
| Item 9                   | 0.72        | 0.72        | 94.2        |
| Item 10                  | 0.65        | 0.65        | 93.0        |
| Item 11                  | 0.61        | 0.62        | 92.4        |
| Item 12                  | 0.79        | 0.79        | 96.6        |
| Item 13                  | 0.78        | 0.78        | 92.2        |
| Item 14                  | 0.53        | 0.52        | 96.5        |
| Item 15                  | 0.59        | 0.58        | 95.0        |
| Item 16                  | 0.61        | 0.61        | 93.9        |

Table S5. Association of FT score with baseline characteristics of patients

|                                                          | Median      | (IQR)              | P (Mann-Whitney) |
|----------------------------------------------------------|-------------|--------------------|------------------|
| <b>All patients</b>                                      | 38.1        | (23.8-57.1)        |                  |
| <b>Region of the hospital</b>                            |             |                    | <b>0.005</b>     |
| North                                                    | <b>28.6</b> | <b>(14.3-47.6)</b> |                  |
| Center                                                   | <b>33.3</b> | <b>(23.8-61.9)</b> |                  |
| South                                                    | <b>42.9</b> | <b>(23.8-57.1)</b> |                  |
| Islands                                                  | <b>52.4</b> | <b>(33.3-57.1)</b> |                  |
| <b>Gender</b>                                            |             |                    | 0.932            |
| Female                                                   | 38.1        | (23.8-57.1)        |                  |
| Male                                                     | 33.3        | (23.8-52.4)        |                  |
| <b>Age category</b>                                      |             |                    | <b>0.005</b>     |
| ≤65                                                      | <b>42.9</b> | <b>(23.8-57.1)</b> |                  |
| >65                                                      | <b>26.2</b> | <b>(14.3-47.6)</b> |                  |
| <b>Education level</b>                                   |             |                    | <b>0.018</b>     |
| Elementary/Middle school                                 | <b>42.9</b> | <b>(23.8-57.1)</b> |                  |
| High school/degree                                       | <b>33.3</b> | <b>(19.0-50.0)</b> |                  |
| <b>Cohabitant/Married</b>                                |             |                    | 0.298            |
| No                                                       | 33.3        | (23.8-52.4)        |                  |
| Yes                                                      | 38.1        | (23.8-57.1)        |                  |
| <b>With dependent family members</b>                     |             |                    | 0.060            |
| No                                                       | 33.3        | (19.0-52.4)        |                  |
| Yes                                                      | 42.9        | (28.6-57.1)        |                  |
| <b>Family members with cancer or chronic disease</b>     |             |                    | <b>0.017</b>     |
| No                                                       | <b>31.0</b> | <b>(19.0-52.4)</b> |                  |
| Yes                                                      | <b>42.9</b> | <b>(23.8-57.1)</b> |                  |
| <b>Working status</b>                                    |             |                    | 0.531            |
| Not working                                              | 33.3        | (19.0-52.4)        |                  |
| Working                                                  | 38.1        | (23.8-57.1)        |                  |
| <b>Site of treatment</b>                                 |             |                    | 0.134            |
| Within the region of residency                           | 38.1        | (23.8-57.1)        |                  |
| Outside the region of residency                          | 28.6        | (19.0-42.9)        |                  |
| <b>Time (years) from initial diagnosis</b>               |             |                    | 0.920            |
| ≤1                                                       | 38.1        | (23.8-57.1)        |                  |
| 1-5                                                      | 33.3        | (23.8-52.4)        |                  |
| ≥5                                                       | 33.3        | (19.0-61.9)        |                  |
| <b>Previous surgery</b>                                  |             |                    | 0.175            |
| No                                                       | 42.9        | (23.8-61.9)        |                  |
| Yes                                                      | 33.3        | (23.8-52.4)        |                  |
| <b>Last/ongoing anticancer treatment at registration</b> |             |                    | 0.546            |
| Chemotherapy                                             | 38.1        | (23.8-57.1)        |                  |
| Target-based agents                                      | 40.5        | (23.8-52.4)        |                  |
| Immunotherapy                                            | 28.6        | (9.5-47.6)         |                  |
| Hormonal therapy                                         | 38.1        | (33.3-42.9)        |                  |
| Radiotherapy                                             | 28.6        | (28.6-28.6)        |                  |



# Reporting checklist for cross sectional study.

Based on the STROBE cross sectional guidelines.

## Instructions to authors

Complete this checklist by entering the page numbers from your manuscript where readers will find each of the items listed below.

Your article may not currently address all the items on the checklist. Please modify your text to include the missing information. If you are certain that an item does not apply, please write "n/a" and provide a short explanation.

Upload your completed checklist as an extra file when you submit to a journal.

In your methods section, say that you used the STROBE cross sectional reporting guidelines, and cite them as:

von Elm E, Altman DG, Egger M, Pocock SJ, Gotsche PC, Vandenbroucke JP. The Strengthening the Reporting of Observational Studies in Epidemiology (STROBE) Statement: guidelines for reporting observational studies.

|                           | Reporting Item                                                                                                      | Page Number |
|---------------------------|---------------------------------------------------------------------------------------------------------------------|-------------|
| <b>Title and abstract</b> |                                                                                                                     |             |
| Title                     | <a href="#">#1a</a> Indicate the study's design with a commonly used term in the title or the abstract              | 1           |
| Abstract                  | <a href="#">#1b</a> Provide in the abstract an informative and balanced summary of what was done and what was found | 3-4         |

|    |                      |                     |                                                            |     |
|----|----------------------|---------------------|------------------------------------------------------------|-----|
| 1  | <b>Introduction</b>  |                     |                                                            |     |
| 2  |                      |                     |                                                            |     |
| 3  |                      |                     |                                                            |     |
| 4  | Background /         | <a href="#">#2</a>  | Explain the scientific background and rationale for the    | 5   |
| 5  |                      |                     |                                                            |     |
| 6  | rationale            |                     | investigation being reported                               |     |
| 7  |                      |                     |                                                            |     |
| 8  |                      |                     |                                                            |     |
| 9  | Objectives           | <a href="#">#3</a>  | State specific objectives, including any prespecified      | 5   |
| 10 |                      |                     | hypotheses                                                 |     |
| 11 |                      |                     |                                                            |     |
| 12 |                      |                     |                                                            |     |
| 13 |                      |                     |                                                            |     |
| 14 |                      |                     |                                                            |     |
| 15 | <b>Methods</b>       |                     |                                                            |     |
| 16 |                      |                     |                                                            |     |
| 17 |                      |                     |                                                            |     |
| 18 | Study design         | <a href="#">#4</a>  | Present key elements of study design early in the paper    | 6   |
| 19 |                      |                     |                                                            |     |
| 20 |                      |                     |                                                            |     |
| 21 | Setting              | <a href="#">#5</a>  | Describe the setting, locations, and relevant dates,       | 11  |
| 22 |                      |                     |                                                            |     |
| 23 |                      |                     | including periods of recruitment, exposure, follow-up,     |     |
| 24 |                      |                     |                                                            |     |
| 25 |                      |                     | and data collection                                        |     |
| 26 |                      |                     |                                                            |     |
| 27 |                      |                     |                                                            |     |
| 28 |                      |                     |                                                            |     |
| 29 | Eligibility criteria | <a href="#">#6a</a> | Give the eligibility criteria, and the sources and methods | 6   |
| 30 |                      |                     | of selection of participants.                              |     |
| 31 |                      |                     |                                                            |     |
| 32 |                      |                     |                                                            |     |
| 33 |                      |                     |                                                            |     |
| 34 |                      | <a href="#">#7</a>  | Clearly define all outcomes, exposures, predictors,        | 6   |
| 35 |                      |                     |                                                            |     |
| 36 |                      |                     | potential confounders, and effect modifiers. Give          |     |
| 37 |                      |                     |                                                            |     |
| 38 |                      |                     | diagnostic criteria, if applicable                         |     |
| 39 |                      |                     |                                                            |     |
| 40 |                      |                     |                                                            |     |
| 41 |                      |                     |                                                            |     |
| 42 | Data sources /       | <a href="#">#8</a>  | For each variable of interest give sources of data and     | 6   |
| 43 |                      |                     |                                                            |     |
| 44 | measurement          |                     | details of methods of assessment (measurement).            |     |
| 45 |                      |                     |                                                            |     |
| 46 |                      |                     | Describe comparability of assessment methods if there      |     |
| 47 |                      |                     |                                                            |     |
| 48 |                      |                     | is more than one group. Give information separately for    |     |
| 49 |                      |                     |                                                            |     |
| 50 |                      |                     | for exposed and unexposed groups if applicable.            |     |
| 51 |                      |                     |                                                            |     |
| 52 |                      |                     |                                                            |     |
| 53 |                      |                     |                                                            |     |
| 54 | Bias                 | <a href="#">#9</a>  | Describe any efforts to address potential sources of       | 7-8 |
| 55 |                      |                     |                                                            |     |
| 56 |                      |                     | bias                                                       |     |
| 57 |                      |                     |                                                            |     |
| 58 |                      |                     |                                                            |     |
| 59 |                      |                     |                                                            |     |
| 60 |                      |                     |                                                            |     |

|    |                |                      |                                                            |     |
|----|----------------|----------------------|------------------------------------------------------------|-----|
| 1  | Study size     | <a href="#">#10</a>  | Explain how the study size was arrived at                  | 6   |
| 2  |                |                      |                                                            |     |
| 3  |                |                      |                                                            |     |
| 4  | Quantitative   | <a href="#">#11</a>  | Explain how quantitative variables were handled in the     | 7   |
| 5  | variables      |                      | analyses. If applicable, describe which groupings were     |     |
| 6  |                |                      | chosen, and why                                            |     |
| 7  |                |                      |                                                            |     |
| 8  |                |                      |                                                            |     |
| 9  |                |                      |                                                            |     |
| 10 |                |                      |                                                            |     |
| 11 |                |                      |                                                            |     |
| 12 | Statistical    | <a href="#">#12a</a> | Describe all statistical methods, including those used to  | 7-8 |
| 13 | methods        |                      | control for confounding                                    |     |
| 14 |                |                      |                                                            |     |
| 15 |                |                      |                                                            |     |
| 16 |                |                      |                                                            |     |
| 17 | Statistical    | <a href="#">#12b</a> | Describe any methods used to examine subgroups and         | 7-8 |
| 18 | methods        |                      | interactions                                               |     |
| 19 |                |                      |                                                            |     |
| 20 |                |                      |                                                            |     |
| 21 |                |                      |                                                            |     |
| 22 |                |                      |                                                            |     |
| 23 | Statistical    | <a href="#">#12c</a> | Explain how missing data were addressed                    | 8   |
| 24 | methods        |                      |                                                            |     |
| 25 |                |                      |                                                            |     |
| 26 |                |                      |                                                            |     |
| 27 |                |                      |                                                            |     |
| 28 | Statistical    | <a href="#">#12d</a> | If applicable, describe analytical methods taking          | 8   |
| 29 | methods        |                      | account of sampling strategy                               |     |
| 30 |                |                      |                                                            |     |
| 31 |                |                      |                                                            |     |
| 32 |                |                      |                                                            |     |
| 33 | Statistical    | <a href="#">#12e</a> | Describe any sensitivity analyses                          | 7-8 |
| 34 | methods        |                      |                                                            |     |
| 35 |                |                      |                                                            |     |
| 36 |                |                      |                                                            |     |
| 37 |                |                      |                                                            |     |
| 38 |                |                      |                                                            |     |
| 39 | <b>Results</b> |                      |                                                            |     |
| 40 |                |                      |                                                            |     |
| 41 |                |                      |                                                            |     |
| 42 | Participants   | <a href="#">#13a</a> | Report numbers of individuals at each stage of study—      | 11  |
| 43 |                |                      | eg numbers potentially eligible, examined for eligibility, |     |
| 44 |                |                      | confirmed eligible, included in the study, completing      |     |
| 45 |                |                      | follow-up, and analysed. Give information separately for   |     |
| 46 |                |                      | for exposed and unexposed groups if applicable.            |     |
| 47 |                |                      |                                                            |     |
| 48 |                |                      |                                                            |     |
| 49 |                |                      |                                                            |     |
| 50 |                |                      |                                                            |     |
| 51 |                |                      |                                                            |     |
| 52 |                |                      |                                                            |     |
| 53 |                |                      |                                                            |     |
| 54 | Participants   | <a href="#">#13b</a> | Give reasons for non-participation at each stage           | 11  |
| 55 |                |                      |                                                            |     |
| 56 |                |                      |                                                            |     |
| 57 |                |                      |                                                            |     |
| 58 |                |                      |                                                            |     |
| 59 |                |                      |                                                            |     |
| 60 |                |                      |                                                            |     |

|    |                  |                      |                                                              |                |
|----|------------------|----------------------|--------------------------------------------------------------|----------------|
| 1  | Participants     | <a href="#">#13c</a> | Consider use of a flow diagram                               | Considered     |
| 2  |                  |                      |                                                              |                |
| 3  |                  |                      |                                                              | but deemed     |
| 4  |                  |                      |                                                              | useless        |
| 5  |                  |                      |                                                              |                |
| 6  |                  |                      |                                                              |                |
| 7  |                  |                      |                                                              |                |
| 8  |                  |                      |                                                              |                |
| 9  | Descriptive data | <a href="#">#14a</a> | Give characteristics of study participants (eg               | 11 (Table 1)   |
| 10 |                  |                      | demographic, clinical, social) and information on            |                |
| 11 |                  |                      | exposures and potential confounders. Give information        |                |
| 12 |                  |                      | separately for exposed and unexposed groups if               |                |
| 13 |                  |                      | applicable.                                                  |                |
| 14 |                  |                      |                                                              |                |
| 15 |                  |                      |                                                              |                |
| 16 |                  |                      |                                                              |                |
| 17 |                  |                      |                                                              |                |
| 18 |                  |                      |                                                              |                |
| 19 |                  |                      |                                                              |                |
| 20 |                  |                      |                                                              |                |
| 21 | Descriptive data | <a href="#">#14b</a> | Indicate number of participants with missing data for        | 11             |
| 22 |                  |                      | each variable of interest                                    |                |
| 23 |                  |                      |                                                              |                |
| 24 |                  |                      |                                                              |                |
| 25 |                  |                      |                                                              |                |
| 26 | Outcome data     | <a href="#">#15</a>  | Report numbers of outcome events or summary                  | Not applicable |
| 27 |                  |                      | measures. Give information separately for exposed and        |                |
| 28 |                  |                      | unexposed groups if applicable.                              |                |
| 29 |                  |                      |                                                              |                |
| 30 |                  |                      |                                                              |                |
| 31 |                  |                      |                                                              |                |
| 32 |                  |                      |                                                              |                |
| 33 |                  |                      |                                                              |                |
| 34 | Main results     | <a href="#">#16a</a> | Give unadjusted estimates and, if applicable,                | Not applicable |
| 35 |                  |                      | confounder-adjusted estimates and their precision (eg,       |                |
| 36 |                  |                      | 95% confidence interval). Make clear which                   |                |
| 37 |                  |                      | confounders were adjusted for and why they were              |                |
| 38 |                  |                      | included                                                     |                |
| 39 |                  |                      |                                                              |                |
| 40 |                  |                      |                                                              |                |
| 41 |                  |                      |                                                              |                |
| 42 |                  |                      |                                                              |                |
| 43 |                  |                      |                                                              |                |
| 44 |                  |                      |                                                              |                |
| 45 |                  |                      |                                                              |                |
| 46 | Main results     | <a href="#">#16b</a> | Report category boundaries when continuous variables         | Not applicable |
| 47 |                  |                      | were categorized                                             |                |
| 48 |                  |                      |                                                              |                |
| 49 |                  |                      |                                                              |                |
| 50 |                  |                      |                                                              |                |
| 51 | Main results     | <a href="#">#16c</a> | If relevant, consider translating estimates of relative risk | Not applicable |
| 52 |                  |                      | into absolute risk for a meaningful time period              |                |
| 53 |                  |                      |                                                              |                |
| 54 |                  |                      |                                                              |                |
| 55 |                  |                      |                                                              |                |
| 56 |                  |                      |                                                              |                |
| 57 |                  |                      |                                                              |                |
| 58 |                  |                      |                                                              |                |
| 59 |                  |                      |                                                              |                |
| 60 |                  |                      |                                                              |                |

|    |                          |                     |                                                            |       |
|----|--------------------------|---------------------|------------------------------------------------------------|-------|
| 1  | Other analyses           | <a href="#">#17</a> | Report other analyses done—e.g., analyses of               | 11-13 |
| 2  |                          |                     |                                                            |       |
| 3  |                          |                     | subgroups and interactions, and sensitivity analyses       |       |
| 4  |                          |                     |                                                            |       |
| 5  |                          |                     |                                                            |       |
| 6  | <b>Discussion</b>        |                     |                                                            |       |
| 7  |                          |                     |                                                            |       |
| 8  |                          |                     |                                                            |       |
| 9  | Key results              | <a href="#">#18</a> | Summarise key results with reference to study              | 15    |
| 10 |                          |                     | objectives                                                 |       |
| 11 |                          |                     |                                                            |       |
| 12 |                          |                     |                                                            |       |
| 13 |                          |                     |                                                            |       |
| 14 |                          |                     |                                                            |       |
| 15 | Limitations              | <a href="#">#19</a> | Discuss limitations of the study, taking into account      | 16-17 |
| 16 |                          |                     | sources of potential bias or imprecision. Discuss both     |       |
| 17 |                          |                     | direction and magnitude of any potential bias.             |       |
| 18 |                          |                     |                                                            |       |
| 19 |                          |                     |                                                            |       |
| 20 |                          |                     |                                                            |       |
| 21 |                          |                     |                                                            |       |
| 22 |                          |                     |                                                            |       |
| 23 | Interpretation           | <a href="#">#20</a> | Give a cautious overall interpretation considering         | 15-16 |
| 24 |                          |                     | objectives, limitations, multiplicity of analyses, results |       |
| 25 |                          |                     | from similar studies, and other relevant evidence.         |       |
| 26 |                          |                     |                                                            |       |
| 27 |                          |                     |                                                            |       |
| 28 |                          |                     |                                                            |       |
| 29 |                          |                     |                                                            |       |
| 30 | Generalisability         | <a href="#">#21</a> | Discuss the generalisability (external validity) of the    | 18    |
| 31 |                          |                     | study results                                              |       |
| 32 |                          |                     |                                                            |       |
| 33 |                          |                     |                                                            |       |
| 34 |                          |                     |                                                            |       |
| 35 | <b>Other Information</b> |                     |                                                            |       |
| 36 |                          |                     |                                                            |       |
| 37 |                          |                     |                                                            |       |
| 38 |                          |                     |                                                            |       |
| 39 | Funding                  | <a href="#">#22</a> | Give the source of funding and the role of the funders     | 22    |
| 40 |                          |                     | for the present study and, if applicable, for the original |       |
| 41 |                          |                     | study on which the present article is based                |       |
| 42 |                          |                     |                                                            |       |
| 43 |                          |                     |                                                            |       |
| 44 |                          |                     |                                                            |       |
| 45 |                          |                     |                                                            |       |

None The STROBE checklist is distributed under the terms of the Creative Commons Attribution License CC-BY. This checklist can be completed online using <https://www.goodreports.org/>, a tool made by the [EQUATOR Network](#) in collaboration with [Penelope.ai](#)

# BMJ Open

## A cross-sectional study to develop and describe psychometric characteristics of a patient-reported instrument (PROFFIT) for measuring financial toxicity of cancer within a public healthcare system

|                               |                                                                                                                                                                                                                                                                                                                                                                                                                                                                                                                                                                                                                                                                                                                                                                                                                                                                                                                                                                                                                                                                                                                                                                                                                                                                                                                                                                                                                                                                                                                                                                                                                                                                                                                                                                                                                                                                                                                                                                                                                                                                                                                                                                                                                                                |
|-------------------------------|------------------------------------------------------------------------------------------------------------------------------------------------------------------------------------------------------------------------------------------------------------------------------------------------------------------------------------------------------------------------------------------------------------------------------------------------------------------------------------------------------------------------------------------------------------------------------------------------------------------------------------------------------------------------------------------------------------------------------------------------------------------------------------------------------------------------------------------------------------------------------------------------------------------------------------------------------------------------------------------------------------------------------------------------------------------------------------------------------------------------------------------------------------------------------------------------------------------------------------------------------------------------------------------------------------------------------------------------------------------------------------------------------------------------------------------------------------------------------------------------------------------------------------------------------------------------------------------------------------------------------------------------------------------------------------------------------------------------------------------------------------------------------------------------------------------------------------------------------------------------------------------------------------------------------------------------------------------------------------------------------------------------------------------------------------------------------------------------------------------------------------------------------------------------------------------------------------------------------------------------|
| Journal:                      | <i>BMJ Open</i>                                                                                                                                                                                                                                                                                                                                                                                                                                                                                                                                                                                                                                                                                                                                                                                                                                                                                                                                                                                                                                                                                                                                                                                                                                                                                                                                                                                                                                                                                                                                                                                                                                                                                                                                                                                                                                                                                                                                                                                                                                                                                                                                                                                                                                |
| Manuscript ID                 | bmjopen-2021-049128.R2                                                                                                                                                                                                                                                                                                                                                                                                                                                                                                                                                                                                                                                                                                                                                                                                                                                                                                                                                                                                                                                                                                                                                                                                                                                                                                                                                                                                                                                                                                                                                                                                                                                                                                                                                                                                                                                                                                                                                                                                                                                                                                                                                                                                                         |
| Article Type:                 | Original research                                                                                                                                                                                                                                                                                                                                                                                                                                                                                                                                                                                                                                                                                                                                                                                                                                                                                                                                                                                                                                                                                                                                                                                                                                                                                                                                                                                                                                                                                                                                                                                                                                                                                                                                                                                                                                                                                                                                                                                                                                                                                                                                                                                                                              |
| Date Submitted by the Author: | 31-Aug-2021                                                                                                                                                                                                                                                                                                                                                                                                                                                                                                                                                                                                                                                                                                                                                                                                                                                                                                                                                                                                                                                                                                                                                                                                                                                                                                                                                                                                                                                                                                                                                                                                                                                                                                                                                                                                                                                                                                                                                                                                                                                                                                                                                                                                                                    |
| Complete List of Authors:     | <p>Riva, Silvia; St Mary's University; University Hospital of Milan<br/> Arenare, Laura<br/> Di Maio, Massimo; Università degli Studi di Torino, Dipartimento di Oncologia, AO Ordine Mauriziano<br/> Efficace, Fabio; Italian Group for Adult Hematologic Diseases (GIMEMA)<br/> Montesarchio, Vincenzo; AORN Ospedali dei Colli, Oncologia<br/> Frontini, Luciano; Federation of Italian Cooperative Oncology Groups (FICOG)<br/> Giannarelli, Diana; Istituto Nazionale per lo Studio e la Cura dei Tumori Regina Elena, IRCCS, Unità di Biostatistica<br/> Bryce, Jane; Istituto Nazionale Tumori IRCCS Fondazione Pascale, Unità Sperimentazioni Cliniche<br/> Del Campo, Laura; Federazione italiana delle Associazioni di Volontariato in Oncologia (FAVO)<br/> De Lorenzo, Francesco; Associazione Italiana Malati di Cancro (AIMAC); European Cancer Patient Coalition (ECPC)<br/> Iannelli, Elisabetta; F.A.V.O. Italian Federation of Volunteer-Based Cancer Organizations<br/> Tracò, Francesca; Associazione Italiana Malati di Cancro (AIMAC)<br/> Gitto, Lara; Università degli Studi di Messina, Dipartimento di Economia<br/> Jommi, Claudio; Università Bocconi<br/> Vaccaro, Concetta Maria; Censis - Centro Studi Investimenti Sociali, Area Welfare e Salute<br/> Barberio, Daniela; Istituto Nazionale Tumori IRCCS Fondazione Pascale, Struttura Semplice Dipartimentale di Psiconcologia Clinica<br/> Cinieri, Saverio; Ospedale Perrino, Oncologia<br/> Porta, Camillo; Fondazione IRCCS Policlinico San Matteo<br/> Del Mastro, Lucia; Ospedale Policlinico San Martino Istituto di Ricovero e Cura a Carattere Scientifico per l'Oncologia, Dipartimento di Medicina Interna e Medicina Specialistica; Università di Genova, Dipartimento di Medicina Interna e Medicina Specialistica<br/> Zagonel, Vittorina; Istituto Oncologico Veneto Istituto di Ricovero e Cura a Carattere Scientifico<br/> Cogoni, Alessio Aligi; AOU di Sassari, Unità operativa complessa di Oncologia Medica<br/> Bordonaro, Roberto; Azienda Ospedaliera di Rilievo Nazionale e di Alta Specializzazione Garibaldi Ospedale Garibaldi-Nesima, Oncologia<br/> Gimigliano, Anna; Istituto Nazionale Tumori IRCCS Fondazione Pascale,</p> |

|                                    |                                                                                                                                                                                                                                                                                                                                                                                                 |
|------------------------------------|-------------------------------------------------------------------------------------------------------------------------------------------------------------------------------------------------------------------------------------------------------------------------------------------------------------------------------------------------------------------------------------------------|
|                                    | Clinical Trials Unit<br>Piccirillo, Maria Carmela; Istituto Nazionale Tumori IRCCS Fondazione Pascale, Clinical Trials Unit<br>Guizzaro, Lorenzo; Università degli Studi della Campania Luigi Vanvitelli Gallo, Ciro; Università degli Studi della Campania Luigi Vanvitelli, Statistica Medica<br>Perrone, Francesco; Istituto Nazionale Tumori IRCCS Fondazione Pascale, Clinical Trials Unit |
| <b>Primary Subject Heading</b> :   | Health economics                                                                                                                                                                                                                                                                                                                                                                                |
| <b>Secondary Subject Heading</b> : | Oncology                                                                                                                                                                                                                                                                                                                                                                                        |
| <b>Keywords</b> :                  | Health economics < HEALTH SERVICES ADMINISTRATION & MANAGEMENT, ONCOLOGY, QUALITATIVE RESEARCH, Quality in health care < HEALTH SERVICES ADMINISTRATION & MANAGEMENT                                                                                                                                                                                                                            |
|                                    |                                                                                                                                                                                                                                                                                                                                                                                                 |

SCHOLARONE™  
Manuscripts



I, the Submitting Author has the right to grant and does grant on behalf of all authors of the Work (as defined in the below author licence), an exclusive licence and/or a non-exclusive licence for contributions from authors who are: i) UK Crown employees; ii) where BMJ has agreed a CC-BY licence shall apply, and/or iii) in accordance with the terms applicable for US Federal Government officers or employees acting as part of their official duties; on a worldwide, perpetual, irrevocable, royalty-free basis to BMJ Publishing Group Ltd ("BMJ") its licensees and where the relevant Journal is co-owned by BMJ to the co-owners of the Journal, to publish the Work in this journal and any other BMJ products and to exploit all rights, as set out in our [licence](#).

The Submitting Author accepts and understands that any supply made under these terms is made by BMJ to the Submitting Author unless you are acting as an employee on behalf of your employer or a postgraduate student of an affiliated institution which is paying any applicable article publishing charge ("APC") for Open Access articles. Where the Submitting Author wishes to make the Work available on an Open Access basis (and intends to pay the relevant APC), the terms of reuse of such Open Access shall be governed by a Creative Commons licence – details of these licences and which [Creative Commons](#) licence will apply to this Work are set out in our licence referred to above.

Other than as permitted in any relevant BMJ Author's Self Archiving Policies, I confirm this Work has not been accepted for publication elsewhere, is not being considered for publication elsewhere and does not duplicate material already published. I confirm all authors consent to publication of this Work and authorise the granting of this licence.



## **A cross-sectional study to develop and describe psychometric characteristics of a patient-reported instrument (PROFFIT) for measuring financial toxicity of cancer within a public healthcare system**

Silvia Riva<sup>1,2</sup>, Laura Arenare<sup>3</sup>, Massimo Di Maio<sup>4</sup>, Fabio Efficace<sup>5</sup>, Vincenzo Montesarchio<sup>6</sup>, Luciano Frontini<sup>7</sup>, Diana Giannarelli<sup>8</sup>, Jane Bryce<sup>3,9,10</sup>, Laura Del Campo<sup>11</sup>, Francesco De Lorenzo<sup>12</sup>, Elisabetta Iannelli<sup>13</sup>, Francesca Tracò<sup>13</sup>, Lara Gitto<sup>14</sup>, Claudio Jommi<sup>15</sup>, Concetta Maria Vaccaro<sup>16</sup>, Daniela Barberio<sup>17</sup>, Saverio Cinieri<sup>18</sup>, Camillo Porta<sup>19a</sup>, Lucia Del Mastro<sup>20,21</sup>, Vittorina Zagonel<sup>22</sup>, Alessio Aligi Cogoni<sup>23</sup>, Roberto Bordonaro<sup>24</sup>, Anna Gimigliano<sup>3</sup>, Maria Carmela Piccirillo<sup>3</sup>, Lorenzo Guizzaro<sup>25</sup>, **Ciro Gallo<sup>25\*</sup>**, **Francesco Perrone<sup>3\*</sup>**

<sup>1</sup> St Mary's University, Twickenham, London, UK

<sup>2</sup> Fondazione IRCCS Ca' Granda Ospedale Maggiore Policlinico, University Hospital of Milan, Italy

<sup>3</sup> Unità Sperimentazioni Cliniche, Istituto Nazionale per lo Studio e la Cura dei Tumori, IRCCS, Fondazione G.Pascale, Napoli, Italy

<sup>4</sup> Dipartimento di Oncologia, Università di Torino, AO Ordine Mauriziano, Torino, Italy

<sup>5</sup> Gruppo Italiano per le Malattie Ematologiche dell'Adulto (GIMEMA) Health Outcomes Research Unit, Roma, Italy

<sup>6</sup> Azienda Ospedaliera Specialistica dei Colli, Napoli, Italy

<sup>7</sup> Federation of Italian Cooperative Oncology Groups (FICOG), Milano, Italy

<sup>8</sup> Unità di Biostatistica, Istituto Nazionale per lo Studio e la Cura dei Tumori Regina Elena, IRCCS, Roma, Italy

<sup>9</sup> Dipartimento di Biomedicina e Prevenzione, Università degli Studi di Roma "Tor Vergata", Roma, Italy

<sup>10</sup> Ascension St. John Clinical Research Institute, Tulsa, USA

<sup>11</sup> Federazione italiana delle Associazioni di Volontariato in Oncologia (FAVO), Rome, Italy

<sup>12</sup> European Cancer Patient Coalition (ECPC), Brussels, Belgium

<sup>13</sup> Associazione Italiana Malati di Cancro (AIMAC), Roma, Italy

<sup>14</sup> Dipartimento di Economia, Università degli Studi di Messina, Italy

<sup>15</sup> CER GAS (Centre for Health and Social Care Management), SDA Bocconi School of Management, Milano, Italy

<sup>16</sup> Area Welfare e Salute, Centro Studi Investimenti Sociali (CENSIS), Roma, Italy

<sup>17</sup> Struttura Semplice Dipartimentale di Psiconcologia Clinica, Istituto Nazionale per lo Studio e la Cura dei Tumori, IRCCS, Fondazione G.Pascale, Napoli, Italy

<sup>18</sup> Unità Operativa Complessa di Oncologia Medica, Ospedale Perrino, Brindisi, Italy

<sup>19</sup> Struttura Complessa di Oncologia Medica, Fondazione IRCCS Policlinico San Matteo, Pavia, Italy

<sup>20</sup> UO Breast Unit, IRCCS Ospedale Policlinico San Martino, Genova, Italy

<sup>21</sup> Dipartimento di Medicina Interna e Medicina Specialistica (DIMI), Università di Genova, Italy

<sup>22</sup> U.O.C. Oncologia 1, Istituto Oncologico Veneto, IOV, IRCCS Padova, Italy

<sup>23</sup> Unità operativa complessa di Oncologia Medica - AOU di Sassari, Italy

<sup>24</sup> Struttura Complessa di Oncologia Medica, ARNAS Garibaldi-Nesima, Catania, Italy

<sup>25</sup> Statistica Medica, Università degli Studi della Campania "Luigi Vanvitelli", Napoli, Italy.

\* co-last authors

<sup>a</sup> present address: Dipartimento di Scienze Biomediche ed Oncologia Umana, Università degli Studi di Bari 'A. Moro' e Azienda Ospedaliero-Universitaria Consorziale Policlinico di Bari, Bari, Italy.

**Corresponding author**

Dr. Francesco Perrone  
Unità Sperimentazioni Cliniche  
Istituto Nazionale per lo Studio e la Cura dei Tumori,  
IRCCS Fondazione Pascale, Napoli  
Via Mariano Semmola  
80131 Napoli, Italy  
[f.perrone@istitutotumori.na.it](mailto:f.perrone@istitutotumori.na.it)  
fax +390817702938  
phone +390815903571

**Word count:** 3627**Key words:** Financial toxicity, Cancer, Patient Reported Outcomes, Patient Reported Experiences, Health Economics

review only

1  
2  
3  
4  
5  
6  
7  
8  
9  
10  
11  
12  
13  
14  
15  
16  
17  
18  
19  
20  
21  
22  
23  
24  
25  
26  
27  
28  
29  
30  
31  
32  
33  
34  
35  
36  
37  
38  
39  
40  
41  
42  
43  
44  
45  
46  
47  
48  
49  
50  
51  
52  
53  
54  
55  
56  
57  
58  
59  
60

## Abstract

**Objectives:** To measure and explain financial toxicity (FT) of cancer in Italy, where a public healthcare system exists and cancer patients are not expected (or only marginally) to pay out-of-pocket for health care.

**Setting:** Ten clinical oncological centres, distributed across Italian macro-regions (North, Centre, South and Islands), including hospitals, university hospitals and national research institutes.

**Participants:** From Oct 8<sup>th</sup>, 2019 to Dec 11<sup>th</sup>, 2019, 184 patients, aged 18 or more, who were receiving or had received within the previous three months active anticancer treatment were enrolled, 108 (59%) females and 76 (41%) males.

**Intervention:** A 30-item pre-final questionnaire, previously developed within the qualitative tasks of the project, was administered, either electronically (n=115) or by paper sheet (n=69).

**Primary and secondary outcome measures:** According to the protocol and the International Society for Pharmacoeconomics and Outcomes Research (ISPOR) methodology, the final questionnaire was developed by mean of explanatory factor analysis and tested for reliability, internal consistency (Cronbach's  $\alpha$  test and item-total correlation) and stability of measurements over time (test-retest reliability by intra-class correlation coefficient and weighted Cohen's Kappa coefficient).

**Results:** After exploratory factor analysis, a score measuring FT (FT-score) was identified, made by 7 items dealing with outcomes of FT. The Cronbach alpha coefficient for the FT-score was 0.87 and the item-total correlation coefficients ranged from 0.53 to 0.74. Further, 9 single items representing possible determinants of FT were also retained in the final

1  
2  
3 instrument. Test-retest analysis revealed a good internal validity of the FT-score and the 16  
4  
5 items retained in the final questionnaire.  
6  
7

8 **Conclusions:** The PROFFIT (Patient Reported Outcome for Fighting Financial Toxicity)  
9  
10 instrument consists of 16 items and is the first reported instrument to assess FT of cancer  
11  
12 developed in a country with a fully public healthcare system.  
13  
14

15  
16 **Trial registration:** clinicaltrials.gov NCT 03473379.  
17  
18

## 19 20 21 22 **ARTICLE SUMMARY**

### 23 24 25 **Strengths and limitations of this study**

- 26  
27  
28 • PROFFIT was developed as a reaction to the finding that financial problems affect  
29  
30 the outcome of cancer patients in Italy, notwithstanding the Italian healthcare  
31  
32 system is based on universal coverage and patients do not pay to access cancer  
33  
34 treatment.  
35  
36
- 37  
38 • No tool for measuring and understanding financial toxicity of cancer had been ever  
39  
40 produced in the context of a public healthcare system with universal coverage.  
41  
42
- 43  
44 • The development of PROFFIT was done according to a widely accepted  
45  
46 methodology to produce patient reported outcome measures.  
47  
48
- 49  
50 • Correlation of PROFFIT with known anchors (quality of life tools, performance  
51  
52 status) and the responsiveness of the instrument over the course of the disease are  
53  
54 being studied.  
55  
56
- 57  
58 • PROFFIT might be of interest for other countries where a public healthcare system  
59  
60 exists.

1  
2  
3  
4  
5  
6  
7  
8  
9  
10  
11  
12  
13  
14  
15  
16  
17  
18  
19  
20  
21  
22  
23  
24  
25  
26  
27  
28  
29  
30  
31  
32  
33  
34  
35  
36  
37  
38  
39  
40  
41  
42  
43  
44  
45  
46  
47  
48  
49  
50  
51  
52  
53  
54  
55  
56  
57  
58  
59  
60

## INTRODUCTION

Financial toxicity (FT) following cancer diagnosis and treatment is an increasingly recognized problem worldwide. While initial reports came from the United States (US), recent data suggest its importance in many other countries with different healthcare systems, like for example Japan, Nepal, Canada and Italy.<sup>1-7</sup> In 2016, we reported financial difficulties among Italian cancer patients enrolled in clinical trials, and their association with worse quality of life and overall survival.<sup>5</sup> Using individual data from 16 randomized trials, we found that patients reporting some degree of financial burden at baseline had a higher chance of worsening global quality of life (QoL) response after treatment, and that patients, who developed financial toxicity during treatment, had a statistically significant shorter survival.<sup>5</sup>

Therefore, in 2018, we started the multicentre PROFFIT (Patient Reported Outcome for Fighting Financial Toxicity of cancer) project to develop a tool for measuring and understanding financial toxicity of cancer that would be sensitive to dimensions of a universal healthcare system. The PROFFIT protocol and the early qualitative findings of the project were reported elsewhere.<sup>8 9</sup> We herein report the quantitative analysis of the 30 items resulting from the early phases of the project and the final questionnaire.

## METHODS

The study protocol was approved by the independent ethical review board of the institutions enrolling patients and is registered on [clinicaltrials.gov](https://clinicaltrials.gov) NCT03473379. Overall, the project was performed according to International Society for Pharmacoeconomics and Outcomes Research (ISPOR) guidelines.<sup>10 11</sup>

### Patient sample and data acquisition

To be included patients had to fulfil the following enrolment criteria: i) adult patients (>18 years), ii) histologically or cytologically confirmed diagnosis of any type of solid cancer or haematological malignancy, iii) medical treatment (chemotherapy, target agents, immunotherapy, hormonal treatment, radiotherapy or combinations of such therapies) ongoing or terminated within the previous three months. The questionnaires could be administered either as paper document or as a tablet digital version, according to centre choice. Written informed consent was required. The minimum sample size was calculated to assess the test-retest reliability. With an acceptable level of intraclass correlation coefficient (ICC) equal to 0.70 and an expected ICC of 0.80, a one-sided alpha 0.05, 80% power, at least 118 patients had to be enrolled.

### Instrument

The first two tasks of the PROFFIT project, concept elicitation and item generation, have been previously described.<sup>9</sup> Briefly, as for concept elicitation, an extensive list of topics related to FT was derived from literature review, expert survey and focus groups. Ten FT

1  
2  
3 domains (medical care, domestic economy, emotion, family, job, health workers, welfare  
4 state, free time and transportation) were described by 156 topics, that reduced to 55 items  
5 after correction for redundancy, and to 30 items after importance analysis. These 30 items  
6  
7  
8 were proposed to further 45 patients within cognitive interviews testing comprehensibility,  
9 recall, judgement and response; the 30 items refined after cognitive interviews represented  
10 the pre-final instrument (**Table S1**).

11  
12  
13  
14  
15  
16  
17 Two groups of items were identified by the study steering committee: (1) *outcome* items  
18 (n=10), i.e. indicators, that reflect the level of the supposed latent FT and that do not alter or  
19 influence the latent construct they measure, and (2) *determinant* items (n= 20), i.e. causal  
20 indicators, that are considered to affect FT and that may change the latent variable. <sup>12</sup>  
21  
22  
23  
24  
25  
26  
27 Separate analyses were performed in the outcome and determinant groups.

## 32 **Statistical analysis**

33  
34  
35 To reduce possible redundancy, the between-item correlation matrix was preliminarily  
36 estimated by pairwise Spearman rank correlation coefficients ( $r_s$ ), because of the ordinal  
37 nature of items; cut-off was set equal to 0.65, and for each pair of items with  $r_s > 0.65$  the  
38 item with the greater score in the previously published importance analysis was retained. <sup>9</sup>  
39  
40  
41  
42  
43  
44 Because information was missing for the five items related to job in 68/184 (37%) patients,  
45 who declared themselves retired or jobless (i.e. househusbands, housewives or individuals  
46 in search of employment), correlation coefficients were estimated separately for job items  
47 (excluding patients with missing data on job items) and for all the other items (within the full  
48 population).

49  
50  
51  
52  
53  
54  
55  
56  
57 Exploratory factor analysis (EFA) was used to discover the presence of multi-item scales  
58 and the distribution of the items consistent with the theoretical framework of FT. <sup>13</sup> To extract  
59  
60

1  
2  
3 factors we used the Principal Axis Factoring (PAF) analysis with Varimax and Promax  
4 rotation, and Kaiser normalization. To determine the number of scale factors, we relied on  
5 the Kaiser criterion to select factors with eigenvalue  $>1$ , the Scree test to depict the  
6 percentage of total variance explained by the factors extracted, and the interpretability of  
7 the factor solution. PAF assumptions were assessed by Bartlett sphericity test and Kaiser-  
8 Meyer-Olkin (KMO) measure of sampling adequacy.<sup>14</sup>  
9  
10  
11  
12  
13  
14  
15  
16

17 Due to missing data in job items, EFA was performed both in the sample of patients with  
18 complete valid information (hereby defined as “restricted sample”), and in the whole sample  
19 (hereby defined as “full sample”), by imputing, for each subject, the missing values with the  
20 average score of the other answered items. A more detailed description of the whole  
21 analysis path is reported in the Appendix.  
22  
23  
24  
25  
26  
27  
28

29 The face validity of the resulting scale was examined, both in terms of the scale global  
30 meaning and in terms of the appropriateness of each individual item to that scale. Internal  
31 consistency, i.e. within-scale between-items correlations, was assessed by Cronbach’s  
32 alpha correlation coefficient, assuming as acceptable a value  $>0.70$ . Relationships between  
33 each individual item  $x_i$  and the total score of the scale to which they were assumed to belong  
34 were assessed by Spearman rank correlation coefficient with correction for overlap, i.e. by  
35 omitting  $x_i$  from the total score. To evaluate stability of measurements over time, the  
36 questionnaire was to be administered again after one week and the test–retest reliability  
37 was assessed by intra-class correlation coefficient (ICC) and weighted Cohen’s Kappa  
38 coefficient. We considered a minimally acceptable level of reliability equal to 0.70 and an  
39 expected ICC of 0.80.  
40  
41  
42  
43  
44  
45  
46  
47  
48  
49  
50  
51  
52  
53  
54

55 A preliminary construct validity analysis, as requested from Reviewers, was performed  
56 evaluating the association of the FT with baseline demographic and clinical variables;  
57  
58  
59  
60



1  
2  
3 however, findings are only suggestive, and need to be independently validated in a larger  
4  
5 independent sample, whose recruitment is ongoing, as stated in the protocol.<sup>8</sup>  
6  
7

8 Descriptive statistics were used to characterize the study sample and their mean scores  
9  
10 answers. The data met all the necessary assumptions for this factor analysis. Statistical  
11  
12 analyses were performed with SPSS version 25.0 (SPSS; Chicago, IL, USA) and with Stata  
13  
14 14 (Stata, College Station, TX, USA)  
15  
16  
17  
18  
19  
20

### 21 **English translation**

22  
23 To allow international comprehension of the final PROFFIT questionnaire, an English  
24  
25 translation was done according to methodology proposed by Wild et al.<sup>15</sup> First, a translation  
26  
27 committee was established including five members of the Steering Committee (FP, SR, CG,  
28  
29 MDM, FE), two English mother-tongue translators and two Italian mother-tongue translators.  
30  
31 Second, the two English translators independently translated the tool into English producing  
32  
33 two forward translations (T1 and T2) that were collected and subsequently discussed in a  
34  
35 meeting where the agreement on the English version was achieved. Third, the two Italian  
36  
37 translators (unaware of the original Italian version) independently back-translated the  
38  
39 English version into Italian; their translations were collected and discussed in a meeting  
40  
41 including the whole translation committee. During such meeting the final English translation  
42  
43 was generated and approved by the Steering Committee. It is important to underline that  
44  
45 the English translation has to be considered just to allow comprehension by non-Italian  
46  
47 readers because it has not been cross-culturally adapted and validated within a population  
48  
49 of English native patients.  
50  
51  
52  
53  
54  
55  
56  
57  
58  
59  
60

### **Patient and public involvement**

1  
2  
3 The project was informed by patients' thanks to the involvement of patients and  
4 representatives of patients' associations in the Steering Committee that oversaw all the  
5 phases of the project, including protocol definition, qualitative analysis (previously reported  
6 elsewhere) producing the pre-final questionnaire, and final analyses producing the final  
7 questionnaire (reported here); they are co-author of this manuscript and of the previous  
8 manuscripts dealing with this project (LDC, FDL, EI, FT). They will also contribute in  
9 dissemination of the results of the project.  
10  
11  
12  
13  
14  
15  
16  
17  
18  
19  
20  
21  
22  
23  
24  
25  
26  
27  
28  
29  
30  
31  
32  
33  
34  
35  
36  
37  
38  
39  
40  
41  
42  
43  
44  
45  
46  
47  
48  
49  
50  
51  
52  
53  
54  
55  
56  
57  
58  
59  
60

For peer review only

1  
2  
3  
4  
5  
6  
7  
8  
9  
10  
11  
12  
13  
14  
15  
16  
17  
18  
19  
20  
21  
22  
23  
24  
25  
26  
27  
28  
29  
30  
31  
32  
33  
34  
35  
36  
37  
38  
39  
40  
41  
42  
43  
44  
45  
46  
47  
48  
49  
50  
51  
52  
53  
54  
55  
56  
57  
58  
59  
60

## RESULTS

From Oct 8<sup>th</sup>, 2019 to Dec 11<sup>th</sup>, 2019, 185 patients were enrolled at 10 participating centres; one patient was excluded because the baseline questionnaire was missing due to a technical problem with web connection of the tablet application. Questionnaires were administered as paper document in 4 centres (69 patients) and as digital tablet application in 6 centres (115 patients). Job-related items had a 37% rate of missing responses; all the remaining items were answered in 100% of the cases, leading to the full sample of 184 patients and the restricted sample of 116 patients.

Demographic and clinical characteristics of both samples are shown in **Table 1**. In the full sample, median age was 59 years (range 29-83) and participants were predominantly female. More than half of the patients had a high level of schooling (high school or degree), and around 70% were married. In terms of clinical characteristics, the great majority of patients had a previous surgery for cancer, and the most common treatment was chemotherapy. As expected, in the restricted sample, patients were younger, with a higher level of education and more frequently actively working.

At the preliminary between-item correlation analysis, six items were excluded (three job-related) because  $r_s$  was greater than 0.65, leading to 9 outcome and 15 determinant items for subsequent analyses (**Table S2a and S2b**).

EFA on the 9-outcome correlation matrix was first performed in the restricted sample of 116 subjects with complete information, because of the presence of the job item Q99. PAF assumptions on the 9 outcome items were met with very good parameters (KMO = 0.82 and Bartlett's test of sphericity,  $p$ -value  $<.001$ ). Two items were excluded because of low communality (see appendix for details). With 7 outcome items, two initial eigenvalues were  $>1$  and explained 66% of the total variance; both could be interpreted as expression of financial burden, the first one being more correlated with items mirroring an actual severe

1  
2  
3 burden while the second one appeared more correlated with worries about the future. This  
4  
5 interpretation was reinforced when oblique Promax rotation was applied (see appendix).  
6  
7

8 In the full sample (KMO = 0.87 and Bartlett's test of sphericity, p-value <.001), with missing  
9  
10 imputation for the job-related item, similar findings were observed. The same seven items  
11  
12 were retained, but only one factor >1 was extracted that explained 57% of the total variance;  
13  
14 factor loadings and communalities are reported in the appendix (EFA on outcome  
15  
16 paragraph).  
17  
18

19  
20 Thus, the PROFFIT FT-score includes 7 outcome items. The Cronbach alpha coefficient for  
21  
22 the PROFFIT FT-score was 0.85 in the restricted sample and 0.87 in the full sample,  
23  
24 indicating that the correlation between the items and the score is consistently reliable.  
25  
26 Correlations between each single item of the FT-score and the total score (after removal of  
27  
28 the single item), ranged from 0.37 to 0.73 in the restricted sample, and from 0.53 to 0.74 in  
29  
30 the full sample (**Table S3**).  
31  
32

33  
34 Similarly, assumptions on the 15 determinants items were met with satisfactory parameters  
35  
36 (KMO = 0.68 and Bartlett's test of sphericity, p-value <0.001). PAF on the determinant items  
37  
38 eliminated 6 items because of low communality and showed that the other 9 items were only  
39  
40 mildly related, without a clear definition of any factor, hence they were retained as single  
41  
42 items (see appendix – EFA on determinants paragraph - for more details).  
43  
44

45  
46 Therefore, the final PROFFIT instrument includes the FT-score (consisting of 7 items) and  
47  
48 9 single items assessing possible determinants of FT. In **Table 2**, both the Italian items and  
49  
50 the English translation are reported. The postulated causal structure for PROFFIT is  
51  
52 reported in **Figure 1**.  
53  
54

55  
56 We excluded from the test-retest analysis all questionnaires administered more than 35 days  
57  
58 (n=52) after the first ones because of the possibility that more than one cycle of treatment  
59  
60

1  
2  
3 could had been given during the interval. However, due to cyclic structure of ongoing  
4 anticancer treatment, most retest questionnaires were actually administered later than the  
5 planned one-week interval from the first assessment. Within 132 cases of the full sample,  
6 median time between test and retest was 21 days; ICC and Cohen's weighted K coefficients  
7 of the FT-score were excellent, being equal to 0.81 and 0.82, respectively. Considering each  
8 singular item, all ICCs and K coefficients were good, ranging from 0.52 and 0.79 (**Table S4**).  
9  
10 Associations of FT-score with baseline characteristics of patients are reported in **Table S5**.  
11  
12 Significant and relevant differences were found in accordance with Italian macro-region,  
13 age, education level and family disease burden.  
14  
15  
16  
17  
18  
19  
20  
21  
22  
23  
24  
25  
26  
27  
28  
29  
30  
31  
32  
33  
34  
35  
36  
37  
38  
39  
40  
41  
42  
43  
44  
45  
46  
47  
48  
49  
50  
51  
52  
53  
54  
55  
56  
57  
58  
59  
60

## DISCUSSION

Financial toxicity has been initially described in the US as a factor negatively affecting cancer patients during their journey, in several ways.<sup>7</sup> Particularly, both QoL and survival have been reported to be worse among patients facing with financial hardships and bankruptcy.<sup>16 17</sup> This might be not surprising given that the US health system prevalently requires out of pocket co-payment of medical expenses, and that the cost of cancer treatment has been steadily increasing.<sup>18</sup>

On the contrary, we were surprised when we earlier observed that financial problems (measured by the EORTC QLQ-C30 questionnaire) were associated with worse QoL and shorter survival also among Italian cancer patients, who actually live in a country with a 74% public coverage of healthcare system.<sup>5 19</sup> However, the extreme simplicity of the single-item #28 of the EORTC QLQ-C30 questionnaire did not allow further understanding of the determinants of the phenomenon. Therefore, we decided to develop an instrument to describe financial toxicity more thoroughly and to explore potential determinants, within the Italian public health system, where the dynamics should be different as compared with a prevalently private health system like the US one.<sup>20 21</sup>

The Italian health care system was shaped, since 1978, as a National Health Service (NHS) model, where the State is the most important financer, via general tax levies.<sup>22</sup> The NHS model prevails in Northern and Southern European Countries, whereas Central Europe is mostly characterized by social insurance-based model, funded by payroll taxes. Regardless the model, the European health care systems are characterized by a high proportion of healthcare expenditure covered by compulsory public programs, ranging from 66% in Spain to 78% in UK, compared to 49% in the USA.<sup>19</sup> The Italian NHS is decentralised, since regions are responsible for healthcare budget.<sup>22</sup> In Europe decentralisation does not depend on the healthcare system model: both NHS-shaped models (eg. UK vs Spain) and

1  
2  
3 social-Insurance models (eg. France vs Germany) are centralised vs decentralised  
4  
5 respectively. Italy shows a lower intermediation of private expenditure than the other major  
6  
7 European countries: in 2018 out-of-pocket expenditure accounted for 89% of private  
8  
9 expenditure in Italy, compared to 40%, 55% and 75% in Germany, France and UK/Spain  
10  
11 respectively.<sup>23</sup> The mean yearly amount of out-of-pocket expenses for cancer patients was  
12  
13 estimated in the same year to be 1841 euros within a survey conducted by the Federazione  
14  
15 italiana delle Associazioni di Volontariato in Oncologia – FAVO.<sup>24</sup>  
16  
17

18  
19 Here we report the PROFFIT questionnaire that, to the best of our knowledge, is the first  
20  
21 instrument fully published from a European country, and that is candidate to be cross-  
22  
23 culturally adapted and validated in other countries with health systems similar to the Italian  
24  
25 public health system. The PROFFIT questionnaire includes the FT-score (consisting of 7  
26  
27 items) and 9 single items assessing possible determinants of FT. In principle, the 7-item FT-  
28  
29 score could be immediately generalizable to every system, once validity has been  
30  
31 confirmed, while the 9 single-item determinants are strictly dependent on the healthcare  
32  
33 system. The latter ones, that are lacking in other tools like COST, were acknowledged by  
34  
35 patients in the cognitive interviews and should be the variable part of the questionnaire to  
36  
37 be assessed in the various frameworks. In terms of construct validity, the PROFFIT score  
38  
39 appears to be sensitive to patients' differences (e.g. Italian macro-regions, age, education  
40  
41 level and family burden of disease), while, on the contrary, the time from cancer diagnosis  
42  
43 has no impact on that score. However, together with other clinical questions, differences will  
44  
45 be further validated in a larger independent sample in the ongoing step 4 of the project by  
46  
47 using confirmatory analysis.  
48  
49  
50  
51  
52  
53  
54  
55  
56  
57  
58  
59  
60

1  
2  
3 The need to have a specific instrument to measure financial toxicity has been previously  
4 addressed in the US by the Investigators who produced and validated the Comprehensive  
5 Score for Financial Toxicity (COST) instrument <sup>25 26</sup> .  
6  
7  
8  
9

10 The methodology applied to develop PROFFIT is similar to that applied for the COST  
11 development, as both followed the ISPOR guidelines. <sup>10 11</sup> Nevertheless, the content of the  
12 two instruments differ, according to the three domains (psychological response, material  
13 conditions and coping behaviours) proposed by Altice et al. to describe financial hardship.  
14  
15  
16  
17  
18  
19  
20 <sup>27</sup> Indeed, while 8 of the 11 items of the COST version 1 questionnaire fall into the “affect”  
21 theme and the psychological response domain, 11 out of the 16 PROFFIT items pertain to  
22 the material conditions domain. This marked difference supports that the sociocultural  
23 context and the health and social care systems may significantly affect the causes and the  
24 consequences of financial problems of cancer patients. <sup>20 21</sup> Recently, the COST-FACIT  
25 version 2) has been developed. In this version, an additional item was added to reflect  
26 overall financial wellbeing  
27 ([https://wizard.facit.org/index.php?option=com\\_facit&view=search&searchPerformed=1](https://wizard.facit.org/index.php?option=com_facit&view=search&searchPerformed=1)  
28 accessed August 18<sup>th</sup>, 2021). However, this additional item was not included in the  
29 calculation of the summary score in the original validation study [25-26] and this makes  
30 difficult to make any comparisons with the US context, at the present time.  
31  
32  
33  
34  
35  
36  
37  
38  
39  
40  
41  
42  
43  
44  
45

46 Therefore, specific instruments should be used within different contexts, and an analysis of  
47 differences between social and health systems should be done before choosing which  
48 instrument might be more appropriate for measuring financial toxicity. An instrument like  
49 PROFFIT, including several items related to determinants of financial toxicity, may be helpful  
50 to identify potential targets for action; and such targets, indeed, might be not immediately  
51 identified within a public health system that should cover all the needs of cancer patients.  
52  
53  
54  
55  
56  
57  
58  
59  
60 Namely, items related to transportation costs, to medical expenses not adequately covered



1  
2  
3 by the public health system and the items pertaining to the quality of medical and non-  
4  
5 medical staff and the communication among them clearly indicate some roadmaps of  
6  
7 intervention that should be addressed within projects of education, organisation and financial  
8  
9 support of various compartments of the welfare system.  
10  
11

12  
13 Around one third of patients did not respond to items related to job activities. For this reason,  
14  
15 we performed correlation analysis separately for job-related items and for all the other items,  
16  
17 and approached EFA using both a restricted sample, including only subjects answering all  
18  
19 items, and the full sample, involving all subjects, where missing responses were imputed  
20  
21 based on responses to the other valid items. We did that, according to the protocol, for both  
22  
23 increasing the power of the analysis and as a sensitivity analysis of findings in the restricted  
24  
25 sample. We chose to input the average score rather than the minimum score because the  
26  
27 latter could be true for retired people (at least in the Italian population), but not for younger  
28  
29 people without job. Further, this choice is consistent with the calculus of the score, where  
30  
31 the missing items are not considered in the denominator. Accordingly, the restricted sample  
32  
33 might be most sensitive to financial distress deriving from job loss or reduction but would  
34  
35 not be representative of the real-world cancer patient population due to the selective  
36  
37 exclusion of older patients, and generalizability would be reduced. On the contrary, the full  
38  
39 sample, that is representative of the general cancer patient population might be less  
40  
41 sensitive to relevance of job problems. We will further investigate the impact of job conditions  
42  
43 in larger multicentre clinical studies through a more detailed definition of job categories,  
44  
45 including all the types of unemployment that led to missing responses.  
46  
47  
48  
49  
50

51  
52 Notwithstanding a longer than planned interval between test and retest questionnaire  
53  
54 administration, that might in principle reduce reproducibility, a good reliability was observed  
55  
56 with all the items.  
57  
58  
59  
60

1  
2  
3 While usually a fixed time window is indicated in patient reported outcomes to define the  
4 period of interest, we decided not to use a fixed temporal frame to which refer the response.  
5  
6  
7 The decision was prompted by the consideration that in the final PROFFIT questionnaires,  
8  
9  
10 some of the items represent patient-reported experiences, rather than pure outcomes, and  
11  
12 might derive from the accumulation of problems over the time. This should make the  
13  
14 instrument more sensitive for cross-sectional studies, where it is not strictly important to  
15  
16 define whether responses refer to a precise time window. Of course, when PROFFIT will be  
17  
18 used as a tool within prospective trials comparing different treatment strategies, a fixed time  
19  
20 might be indicated. The flexibility proposed by the PROFFIT aims to facilitate its use in  
21  
22 healthcare settings alongside routine psycho-oncological assessments for stress and quality  
23  
24 of life where stress/financial anxiety could represent a new construct to be systematically  
25  
26 assessed as recently suggested.<sup>28</sup> The PROFFIT will be also able to monitor patients' social  
27  
28 conditions including work and family status, dimensions that seems extremely sensitive to  
29  
30  
31 FT.<sup>29 30</sup>  
32  
33  
34

35  
36 According to the protocol, larger studies are planned to confirm criterion and construct  
37  
38 validity of the PROFFIT instrument, and to assess the responsiveness of the tool [12] over  
39  
40 the course of the disease and in different types of patients. In the meanwhile, the  
41  
42 questionnaire is available for all Investigators wishing to cross-validate it into different  
43  
44 languages and countries. No fee will be required for using the questionnaire for purely  
45  
46 academic studies, but registration of the protocols will be required and written agreements  
47  
48 with the National Cancer Institute of Naples, Italy, will be requested.  
49  
50

51  
52 In conclusion, financial toxicity is a major problem in oncology also within a universal  
53  
54 healthcare system, hence the availability of specific and validated instruments is crucial to  
55  
56 better understand its causes and its relationship with different aspects of cancer disease.  
57  
58  
59 Ultimately, data generated via this newly developed tool will provide insights on how to  
60

1  
2  
3  
4  
5  
6  
7  
8  
9  
10  
11  
12  
13  
14  
15  
16  
17  
18  
19  
20  
21  
22  
23  
24  
25  
26  
27  
28  
29  
30  
31  
32  
33  
34  
35  
36  
37  
38  
39  
40  
41  
42  
43  
44  
45  
46  
47  
48  
49  
50  
51  
52  
53  
54  
55  
56  
57  
58  
59  
60

collaborate in the fight against financial toxicity, and hopefully improve the outcomes of cancer patients.

For peer review only

**Table 1. Characteristics of participating patients**

|                                                             | Full sample<br>N = 184 | Restricted sample<br>N = 116 |
|-------------------------------------------------------------|------------------------|------------------------------|
| <b>Gender, n (%)</b>                                        |                        |                              |
| Female                                                      | 108 (58,7)             | 63 (54,3)                    |
| Male                                                        | 76 (41,3)              | 53 (45,7)                    |
| <b>Age, median (range)</b>                                  | 59 (29-82)             | 55 (29-74)                   |
| <b>Age category, n (%)</b>                                  |                        |                              |
| ≤60                                                         | 94 (51,1)              | 72 (62,1)                    |
| >60                                                         | 90 (48,9)              | 44 (37,9)                    |
| <b>Macro-region of the participating institution, n (%)</b> |                        |                              |
| North                                                       | 71 (38,6)              | 46 (39,7)                    |
| Center                                                      | 15 (8,2)               | 9 (7,8)                      |
| South                                                       | 71 (38,6)              | 43 (37,1)                    |
| Islands                                                     | 27 (14,7)              | 18 (15,5)                    |
| <b>Education level, n (%)</b>                               |                        |                              |
| Elementary school                                           | 23 (12,5)              | 8 (6,9)                      |
| Middle school                                               | 57 (31,0)              | 33 (28,4)                    |
| High school/degree                                          | 104 (56,5)             | 75 (64,7)                    |
| <b>Marital status, n (%)</b>                                |                        |                              |
| Married                                                     | 132 (71,7)             | 82 (70,7)                    |
| Other                                                       | 52 (28,3)              | 34 (29,3)                    |
| <b>With dependent family members, n (%)</b>                 |                        |                              |
| No                                                          | 107 (58,2)             | 60 (51,7)                    |
| Yes                                                         | 77 (41,8)              | 56 (48,3)                    |
| <b>Family members with cancer or chronic disease, n (%)</b> |                        |                              |
| No                                                          | 82 (44,6)              | 52 (44,8)                    |
| Yes                                                         | 102 (55,4)             | 64 (55,2)                    |
| <b>Working status, n (%)</b>                                |                        |                              |
| Working                                                     | 84 (45,7)              | 82 (70,7)                    |
| Not working                                                 | 100 (54,3)             | 34 (29,3)                    |
| <b>Distance (km) from the hospital, median (range)</b>      | 20 (1-430)             | 25 (1-286)                   |
| <b>Time (years) from initial diagnosis, n (%)</b>           |                        |                              |
| ≤1                                                          | 80 (43,5)              | 54 (46,6)                    |
| 1-5                                                         | 65 (35,3)              | 38 (32,8)                    |
| ≥5                                                          | 39 (21,2)              | 24 (20,7)                    |

**Table 1. Characteristics of participating patients**

|                                      | Full sample<br>N = 184 | Restricted sample<br>N = 116 |
|--------------------------------------|------------------------|------------------------------|
| <b>Previous treatment, n (%)</b>     |                        |                              |
| Surgery                              | 129 (70,1)             | 81 (69,8)                    |
| Chemotherapy                         | 157 (85,3)             | 94 (81,0)                    |
| Target-based agents                  | 55 (29,9)              | 37 (31,9)                    |
| Immunotherapy                        | 38 (20,7)              | 28 (24,1)                    |
| Hormonal therapy                     | 31 (16,8)              | 18 (15,5)                    |
| Radiotherapy                         | 43 (23,4)              | 28 (24,1)                    |
| <b>Last/ongoing treatment, n (%)</b> |                        |                              |
| Chemotherapy                         | 135 (73,4)             | 79 (68,1)                    |
| Target-based agents                  | 18 (9,8)               | 13 (11,2)                    |
| Immunotherapy                        | 25 (13,6)              | 19 (16,4)                    |
| Hormonal therapy                     | 5 (2,7)                | 4 (3,4)                      |
| Radiotherapy                         | 1 (0,5)                | 1 (0,9)                      |
| <b>Primary tumour site, n (%)</b>    |                        |                              |
| Breast                               | 59 (32,1)              | 36 (31,0)                    |
| Lower_gastrointestinal tract         | 51 (27,7)              | 24 (20,7)                    |
| Genito-urinary                       | 34 (18,5)              | 27 (23,3)                    |
| Thoracic                             | 18 (9,8)               | 13 (11,2)                    |
| Upper_gastrointestinal tract         | 13 (7,1)               | 10 (8,6)                     |
| Other                                | 9 (4,9)                | 6 (5,2)                      |

**Table 2. Final PROFFIT instrument**

| Item type and number                    | Italian version                                                                                                              | English translation (for comprehension only)                                                                                                         |
|-----------------------------------------|------------------------------------------------------------------------------------------------------------------------------|------------------------------------------------------------------------------------------------------------------------------------------------------|
| <b>Outcome items (FT-score)</b>         |                                                                                                                              |                                                                                                                                                      |
| 1.                                      | Sono in grado di sostenere le mie spese mensili senza difficoltà (ad esempio per affitto, elettricità, telefono...)          | I can afford my monthly expenses without difficulty (for example rent, electricity, phone...)                                                        |
| 2.                                      | La mia malattia ha ridotto le mie disponibilità economiche                                                                   | My illness has reduced my financial resources                                                                                                        |
| 3.                                      | Sono preoccupato dei problemi economici che potrei avere in futuro a causa della malattia                                    | I am concerned by the economic problems I may have in the future due to my illness                                                                   |
| 4.                                      | La mia condizione economica incide sulle mie possibilità di curarmi                                                          | My economic situation affects the possibility of receiving medical care                                                                              |
| 5.                                      | Ho ridotto le spese per attività ricreative come vacanze, ristoranti o spettacoli per affrontare le spese della mia malattia | I have reduced my spending on leisure activities such as holidays, restaurants or entertainment in order to cope with expenses related to my illness |
| 6.                                      | Ho ridotto le spese per acquisti essenziali (ad esempio il cibo) per affrontare le spese per la mia malattia                 | I have reduced spending on essential goods (for example food) in order to cope with expenses related to my illness                                   |
| 7.                                      | Sono preoccupata/o di non riuscire a lavorare a causa della mia malattia                                                     | I am worried that I will not be able to work due to my illness                                                                                       |
| <b>Determinant items (single items)</b> |                                                                                                                              |                                                                                                                                                      |
| 8.                                      | Il Servizio Sanitario Nazionale copre tutti i costi sanitari associati alla mia malattia                                     | The National Health Service covers all health costs related to my illness                                                                            |
| 9.                                      | Ho sostenuto spese per una o più visite private per la mia malattia                                                          | I have paid for one or more private medical examinations for my illness                                                                              |
| 10.                                     | Ho sostenuto spese per farmaci supplementari o integratori per la mia malattia                                               | I have paid for additional medicines or supplements related to my illness                                                                            |
| 11.                                     | Devo sostenere spese per cure integrative a mio carico (es. fisioterapia, psicoterapia, cure odontoiatriche)                 | I have to pay for additional treatment myself (for example physiotherapy, psychotherapy, dental care)                                                |
| 12.                                     | Il centro di cura è lontano dalla mia abitazione                                                                             | The treatment centre is a long way from where I live                                                                                                 |
| 13.                                     | Ho dovuto sostenere rilevanti costi di trasporto per curarmi                                                                 | I have spent a considerable amount of money on travel for treatment                                                                                  |
| 14.                                     | Il personale sanitario (cioè medici, infermieri, etc.) ha agevolato il percorso di cura                                      | Medical staff (that is doctors, nurses etc.) have been helpful throughout my medical care                                                            |
| 15.                                     | Il personale ospedaliero amministrativo (cioè centro di prenotazione, segreterie, etc.) ha agevolato il percorso di cura     | Staff in hospital administration (that is for booking appointments, secretaries, etc.) have been helpful throughout my medical care                  |
| 16.                                     | C'è stata comunicazione tra i medici e le strutture sanitarie che mi seguono                                                 | Medical staff and medical facilities I attended communicated with each other                                                                         |

## Legend of figure

Figure 1. Postulated causal structure for PROFFIT tool

## Acknowledgments

See appendix.

## Authors contribution

FP obtained funding. SR, JB, CG and FP drafted the manuscript. MDM, FE, VM, LF, DG, LDC, FDL, EI, FT, LG, CJ, CMV, and MCP contributed to manuscript writing. MDM, VM, DG, DB, SC, CP, LDM, VZ, AAC, RB, AG and FP contributed to patients' enrolment. SR, LA, LG, CG and FP performed statistical analysis and drafted the manuscript. All Authors contributed to the manuscript and approved the final version.

## Data

Data will be made available upon request to the corresponding author.

## Funding

The project is supported by Fondazione AIRC (Associazione Italiana per la Ricerca sul Cancro), a non-profit Italian charity, IG 2017 Id 20402

## Ethical approval statement

The study protocol was initially approved by the Ethics Committee of the National Cancer Institute of Naples, that acted as coordinating Ethics Committee. Date of first approval is October 18, 2017 and code of approval is 18/17oss. Thereafter, the protocol was approved by Ethics Committee at each participating centre.

1  
2  
3  
4  
5  
6  
7  
8  
9  
10  
11  
12  
13  
14  
15  
16  
17  
18  
19  
20  
21  
22  
23  
24  
25  
26  
27  
28  
29  
30  
31  
32  
33  
34  
35  
36  
37  
38  
39  
40  
41  
42  
43  
44  
45  
46  
47  
48  
49  
50  
51  
52  
53  
54  
55  
56  
57  
58  
59  
60

For peer review only



1  
2  
3  
4  
5  
6  
7  
8  
9  
10  
11  
12  
13  
14  
15  
16  
17  
18  
19  
20  
21  
22  
23  
24  
25  
26  
27  
28  
29  
30  
31  
32  
33  
34  
35  
36  
37  
38  
39  
40  
41  
42  
43  
44  
45  
46  
47  
48  
49  
50  
51  
52  
53  
54  
55  
56  
57  
58  
59  
60

## References

1. Ezeife DA, Morganstein BJ, Lau S, et al. Financial Burden Among Patients With Lung Cancer in a Publically Funded Health Care System. *Clin Lung Cancer* 2018 doi: 10.1016/j.clcc.2018.12.010 [published Online First: 2019/02/25]
2. Honda K, Gyawali B, Ando M, et al. Prospective Survey of Financial Toxicity Measured by the Comprehensive Score for Financial Toxicity in Japanese Patients With Cancer. *J Glob Oncol* 2019;5:1-8. doi: 10.1200/JGO.19.00003 [published Online First: 2019/05/10]
3. Longo CJ, Fitch MI, Banfield L, et al. Financial toxicity associated with a cancer diagnosis in publicly funded healthcare countries: a systematic review. *Supportive Care in Cancer* 2020;28(10):4645-65. doi: 10.1007/s00520-020-05620-9
4. Lueckmann SL, Schumann N, Hoffmann L, et al. 'It was a big monetary cut'-A qualitative study on financial toxicity analysing patients' experiences with cancer costs in Germany. *Health Soc Care Community* 2020;28(3):771-80. doi: 10.1111/hsc.12907 [published Online First: 2019/12/06]
5. Perrone F, Jommi C, Di Maio M, et al. The association of financial difficulties with clinical outcomes in cancer patients: secondary analysis of 16 academic prospective clinical trials conducted in Italy. *Annals of oncology : official journal of the European Society for Medical Oncology / ESMO* 2016;27(12):2224-29. doi: 10.1093/annonc/mdw433
6. Poudyal BS, Giri S, Tuladhar S, et al. A survey in Nepalese patients with acute leukaemia: a starting point for defining financial toxicity of cancer care in low-income and middle-income countries. *The Lancet Haematology* 2020;7(9):e638-e39. doi: [https://doi.org/10.1016/S2352-3026\(20\)30258-1](https://doi.org/10.1016/S2352-3026(20)30258-1)
7. Zafar SY. Financial Toxicity of Cancer Care: It's Time to Intervene. *J Natl Cancer Inst* 2016;108(5) doi: 10.1093/jnci/djv370 [published Online First: 2015/12/15]
8. Riva S, Bryce J, De Lorenzo F, et al. Development and validation of a patient-reported outcome tool to assess cancer-related financial toxicity in Italy: a protocol. *BMJ Open* 2019;9(9):e031485. doi: 10.1136/bmjopen-2019-031485 [published Online First: 2019/09/11]
9. Riva S, Efficace F, Di Maio M, et al. A qualitative analysis and development of a conceptual model assessing financial toxicity in cancer patients accessing the universal healthcare system. *Support Care Cancer* 2020 doi: 10.1007/s00520-020-05840-z [published Online First: 2020/10/24]
10. Patrick DL, Burke LB, Gwaltney CJ, et al. Content validity--establishing and reporting the evidence in newly developed patient-reported outcomes (PRO) instruments for medical product evaluation: ISPOR PRO Good Research Practices Task Force report: part 2--assessing respondent understanding. *Value in health : the journal of the International Society for Pharmacoeconomics and Outcomes Research* 2011;14(8):978-88. doi: 10.1016/j.jval.2011.06.013
11. Patrick DL, Burke LB, Gwaltney CJ, et al. Content validity--establishing and reporting the evidence in newly developed patient-reported outcomes (PRO) instruments for medical product evaluation: ISPOR PRO good research practices task force report: part 1--eliciting concepts for a new PRO instrument. *Value in health : the journal of the International Society for Pharmacoeconomics and Outcomes Research* 2011;14(8):967-77. doi: 10.1016/j.jval.2011.06.014
12. Fayers PM, Machin D. Quality of Life: Assessment, Analysis and Interpretation 2000.
13. Floyd FJ, Widaman KF. Factor analysis in the development and refinement of clinical assessment instruments. *Psychological Assessment* 1995;7(3):286-99. doi: 10.1037/1040-3590.7.3.286
14. Fabrigar LR, Wegener DT. Exploratory Factor Analysis 2012.
15. Wild D, Grove A, Martin M, et al. Principles of Good Practice for the Translation and Cultural Adaptation Process for Patient-Reported Outcomes (PRO) Measures: report of the ISPOR Task Force for Translation and Cultural Adaptation. *Value in health : the journal of the International Society for Pharmacoeconomics and Outcomes Research* 2005;8(2):94-104. doi: 10.1111/j.1524-4733.2005.04054.x [published Online First: 2005/04/05]

16. Lathan CS, Cronin A, Tucker-Seeley R, et al. Association of Financial Strain With Symptom Burden and Quality of Life for Patients With Lung or Colorectal Cancer. *Journal of clinical oncology : official journal of the American Society of Clinical Oncology* 2016;34(15):1732-40. doi: 10.1200/JCO.2015.63.2232
17. Ramsey SD, Bansal A, Fedorenko CR, et al. Financial Insolvency as a Risk Factor for Early Mortality Among Patients With Cancer. *Journal of clinical oncology : official journal of the American Society of Clinical Oncology* 2016;34(9):980-6. doi: 10.1200/JCO.2015.64.6620 [published Online First: 2016/01/27]
18. Ramsey SD, Lyman GH, Bangs R. Addressing Skyrocketing Cancer Drug Prices Comes With Tradeoffs: Pick Your Poison. *JAMA Oncol* 2016;2(4):425-26. doi: 10.1001/jamaoncol.2015.5813
19. Armeni PB, A.; Borsoi, L.; Costa, F. . La spesa sanitaria: composizione ed evoluzione. In: (ed.) CB, ed. Rapporto Oasi 2020. Milano: Egea, 2020.
20. Perrone F, Di Maio M, Efficace F, et al. Assessing Financial Toxicity in Patients With Cancer: Moving Away From a One-Size-Fits-All Approach. *J Oncol Pract* 2019;JOP1900200. doi: 10.1200/JOP.19.00200 [published Online First: 2019/05/28]
21. Rotter J, Spencer JC, Wheeler SB. Financial Toxicity in Advanced and Metastatic Cancer: Overburdened and Underprepared. *J Oncol Pract* 2019;JOP1800518. doi: 10.1200/JOP.18.00518 [published Online First: 2019/03/08]
22. Donatini A. The Italian health Care system. In: Tikkanen RO, R.; Mossialos, E.; Djordjevic, A.; Wharton, G. (ed). ed. The 2020 International Profiles of Health Care Systems: A Useful Resource for Interpreting Country Responses to the COVID-19 Pandemic 2020.
23. Del Vecchio MF, L.; Preti, L.M.; Rappini, R. I consumi privati in sanità. . In: Bocconi C, ed. Rapporto Oasi 2020. Milano: Egea, 2020.
24. De Lorenzo FT, F.; Del Campo, L.; Iannelli, E.; Pero, D.; Beretta G.; Sproviero, A.; Carelli, S.; Sant, M.; Lillini, R.; Baili, P.; Perrone, F.; Pugliese, P.; Collicelli, C. Indagine sui costi sociali ed economici del cancro nel 2018. In: Oncologia) FFIdAdVi, ed. 11° Rapporto sulla condizione assistenziale dei malati oncologici, 2018.
25. de Souza JA, Yap BJ, Hlubocky FJ, et al. The development of a financial toxicity patient-reported outcome in cancer: The COST measure. *Cancer* 2014;120(20):3245-53. doi: 10.1002/cncr.28814 [published Online First: 2014/06/24]
26. de Souza JA, Yap BJ, Wroblewski K, et al. Measuring financial toxicity as a clinically relevant patient-reported outcome: The validation of the COmprehensive Score for financial Toxicity (COST). *Cancer* 2017;123(3):476-84. doi: 10.1002/cncr.30369 [published Online First: 2016/10/08]
27. Altice CK, Banegas MP, Tucker-Seeley RD, et al. Financial Hardships Experienced by Cancer Survivors: A Systematic Review. *J Natl Cancer Inst* 2017;109(2) doi: 10.1093/jnci/djw205 [published Online First: 2016/10/22]
28. Jones SMW, Du Y, Panattoni L, et al. Assessing Worry About Affording Healthcare in a General Population Sample. *Front Psychol* 2019;10:2622. doi: 10.3389/fpsyg.2019.02622 [published Online First: 2019/12/12]
29. Kirchhoff A, Jones S. Financial Toxicity in Adolescent and Young Adult Cancer Survivors: Proposed Directions for Future Research. *J Natl Cancer Inst* 2021;113(8):948-50. doi: 10.1093/jnci/djab014 [published Online First: 2021/04/12]
30. Lu AD, Zheng Z, Han X, et al. Medical Financial Hardship in Survivors of Adolescent and Young Adult Cancer in the United States. *J Natl Cancer Inst* 2021;113(8):997-1004. doi: 10.1093/jnci/djab013 [published Online First: 2021/04/12]

1  
2  
3  
4  
5  
6  
7  
8  
9  
10  
11  
12  
13  
14  
15  
16  
17  
18  
19  
20  
21  
22  
23  
24  
25  
26  
27  
28  
29  
30  
31  
32  
33  
34  
35  
36  
37  
38  
39  
40  
41  
42  
43  
44  
45  
46  
47  
48  
49  
50  
51  
52  
53  
54  
55  
56  
57  
58  
59  
60

### **Disclosures of conflicts of interest**

SR has received personal fees from CSL-Behring and GlaxoSmithKline Foundation.

MDM has received personal fees from Bristol Myers Squibb, Merck Sharp & Dohme, Astra Zeneca, Janssen, Astellas, Pfizer, Eisai, Takeda.

FE has received personal fees from AbbVie, BMS, Amgen, Orsenix, Takeda and research grant (Institution) from Amgen.

VM has received personal fees from Bristol Myers Squibb and Italfarmaco; a member of his family is employee in Bayer.

CJ has received personal fees from Amgen, Astra Zeneca, Biogen, Boehringer Ingelheim, Celgene, Gilead, GSK, Ipsen, Janssen-Cilag, Takeda and Sanofi.

CMV has received personal fees from from Baxter, MSD, Novartis, Sanofi, Sanofi Genzyme.

CP acted as a Speaker and/or Consultant for MSD, BMS, AstraZeneca, Ipsen, Pfizer, Eisai, EUSA, Novartis, Merck, General Electrics and Angelini; furthermore, was an Expert Testimony for Pfizer and EUSA.

LDM has received personal fees from Eli Lilly, Roche, MSD, Novartis, Genomic Health, Pierre Fabre, Pfizer, Seattle Genetics, Daiichi Sankyo, Astra Zeneca, Ipsen, Eisai.

VZ has received personal fees from BMS, MSD, Eisai, Italfarmaco, Roche, Astellas Pharma, Servier, Astra Zeneca, MSD, Janssen, Ipsen and research grant (Institution) from Bayer, Roche, Eli Lilly, Astra Zeneca, BMS, Ipsen, Astellas.

RB reports personal fees from Bayer, Astra Zeneca, Sanofi, Novartis, Amgen, Hoffmann La Roche, Pfizer, Janssen Cilag, Bristol Myers Squibb, Merck.

1  
2  
3 MCP reports personal fees from Daichii Sankyo, personal fees from GSK, personal fees  
4 from MSD, grants from Roche, grants and personal fees from AstraZeneca, non-financial  
5 support from Bayer.  
6  
7  
8

9  
10 FP has received personal fees from Bayer, Ipsen, Astra Zeneca, Bristol Myers Squibb,  
11 Sandoz, Incyte, Celgene, Pierre Fabre, Janssen-Cilag and research grants (Institution)  
12 from Astra Zeneca, Bayer, Roche, Merck, Pfizer, Incyte, Sanofi, BioClin, Tesaro. All the  
13 above disclosures are outside the submitted work.  
14  
15  
16  
17  
18

19  
20 The other Authors have no conflict to disclose.  
21  
22  
23  
24  
25  
26  
27  
28  
29  
30  
31  
32  
33  
34  
35  
36  
37  
38  
39  
40  
41  
42  
43  
44  
45  
46  
47  
48  
49  
50  
51  
52  
53  
54  
55  
56  
57  
58  
59  
60

1  
2  
3  
4  
5  
6  
7  
8  
9  
10  
11  
12  
13  
14  
15  
16  
17  
18  
19  
20  
21  
22  
23  
24  
25  
26  
27  
28  
29  
30  
31  
32  
33  
34  
35  
36  
37  
38  
39  
40  
41  
42  
43  
44  
45  
46  
47

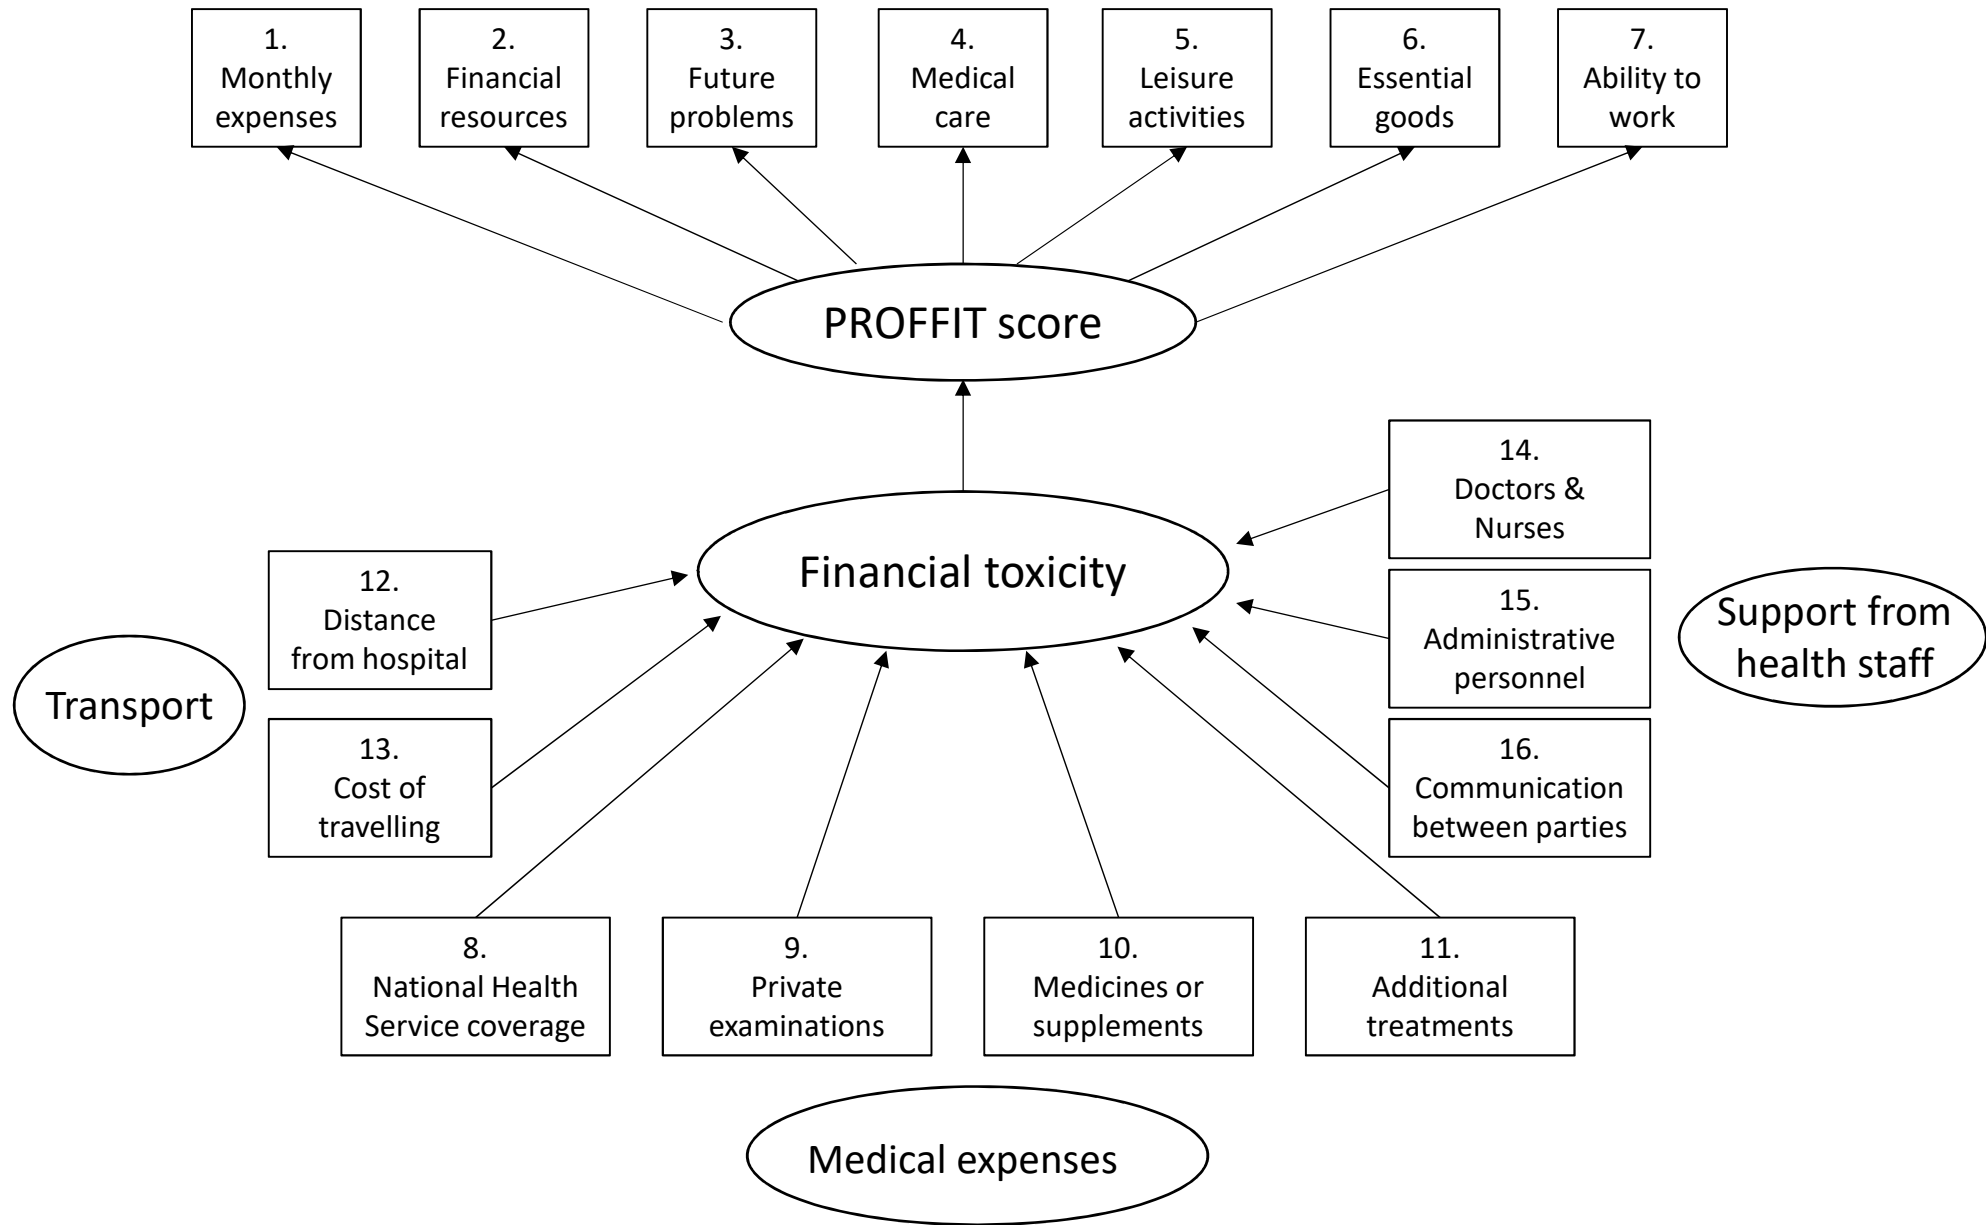

Figure 1.

1  
2  
3 **A cross-sectional study to develop and describe psychometric characteristics of a**  
4 **patient-reported instrument (PROFFIT) for measuring financial toxicity of cancer**  
5 **within a public healthcare system**  
6  
7

8  
9 **Appendix**  
10

11  
12  
13 **Index**

14  
15 Steering Committee and participating Investigators.....2  
16  
17 Scoring procedure .....4  
18     Examples of calculation of FT score.....5  
19     Examples of calculation of single determinants scores .....6  
20  
21 Table S1. List of items in the pre-final instrument .....7  
22  
23 Questionnaire development .....8  
24  
25 Table S2. Spearman correlation coefficients between items .....9  
26     Table S2a. Job items.....9  
27     Table S2b. All other items .....9  
28  
29 Exploratory Factor Analysis (EFA).....10  
30     EFA on Outcome.....10  
31     EFA on Determinants .....13  
32  
33 Convergent validity .....15  
34     Table S3. Spearman correlation coefficients between each item and total score\* .....15  
35  
36 Repeatability .....16  
37  
38 Table S4. Test-retest results .....16  
39  
40 Table S5. Association of FT score with baseline characteristics of patients .....17  
41  
42  
43  
44  
45  
46  
47  
48  
49  
50  
51  
52  
53  
54  
55  
56  
57  
58  
59  
60

## Steering Committee and participating Investigators

The PROFFIT Steering Committee includes: Francesco Perrone, Jane Bryce, Ciro Gallo, Silvia Riva, Fabio Efficace, Francesco De Lorenzo, Elisabetta Iannelli, Laura Del Campo, Francesca Tracò, Massimo Di Maio (also as representative of AIOM – Associazione Italiana di Oncologia Medica), Luciano Frontini, Vincenzo Montesarchio (also as representative of CIPOMO – Collegio Italiano dei Primari di Oncologia Medica Ospedalieri), Diana Giannarelli, Lara Gitto, Claudio Jommi, Concetta Maria Vaccaro.

We acknowledge the contribution of the other personnel working at the Unità Sperimentazioni Cliniche of the Istituto Nazionale per lo Studio e la Cura dei Tumori, IRCCS Fondazione Pascale of Napoli: Adriano Gravina, Clorinda Schettino, Piera Gargiulo, Lucia Sparavigna, Giuliana Canzanella, Fiorella Romano, Valentina Barbato, Manuela Florio, Simona Bevilacqua, Gaetano Buonfanti, Alfonso Savio, Antonia Del Giudice, Teresa Ribecco, Marilena Martino, Giovanni De Matteis.

The following personnel contributed to the project at the participating centers:

- Istituto Nazionale Tumori - IRCCS – Fondazione G.Pascale, Napoli: Daniela Barberio, Ermelinda Quarata, Maria Florencia Gonzalez Leone, Gessica Migliaccio, Francesca Laudato, Maria Rosaria Esposito
- AO Ordine Mauriziano - S.C.D.U Oncologia Medica, Torino: Gaetano Lacidogna, Elisa Sperti, Francesca Vignani, Donatella Marino, Sabrina Terzolo, Luisa Fusco, Annalisa Bellezza, Laura Polimeno
- UOS Biostatistica - Istituto Regina Elena, Roma (Diana Giannarelli, Filomena Spasiano, Luana Fotia, Barbara Matrasci)
- U.O.C. Oncologia Medica A.O. Garibaldi, Catania (Roberto Bordonaro, Stefano Cordio, Concetta Sergi, Fabrizio Castagna, Francesco Avola, Laura Longhitano, Desiree Caudullo)
- U.O.C. Oncologia Medica - Ospedale Senatore Antonio Perrino, Brindisi (Saverio Cinieri, Manuela Caloro, Laura Orlando, Dario Loparco)
- Oncologia Medica 2 - IRCCS AOU San Martino - IST, Genova (Lucia Del Mastro)
- AO Ordine Mauriziano - S.C.D.U Oncologia Medica, Torino (Massimo Di Maio)
- U.O.C. Oncologia - Presidio Monaldi - AORN dei Colli, Napoli (Vincenzo Montesarchio, Giusy Petrillo)

- Unità operativa complessa di Oncologia Medica - AOU di Sassari (Antonio Pazzola, Alessio Aligi Cogoni)
- Oncologia traslazionale – I.R.C.C.S. Istituti Clinici Scientifici Maugeri, Pavia (Camillo Porta)
- U.O.C. Oncologia 1, Istituto Oncologico Veneto, IOV, IRCCS Padova (Vittorina Zagonel, Eleonora Bergo).

Italian to English translation was done thank to the voluntary contribution of Iain Halliday, Salvo Ciancitto, and Francesca Vigo (University of Catania, Dipartimento di Scienze Umanistiche), and Daniel Matheson (freelance translator).

A graphic logo (see below) has been created thanks to the voluntary contribution of Valeria Lepore, Pierpaola Borzacchiello, and Carla Langella (director), Design per la Valorizzazione Scientifica, Università della Campania Luigi Vanvitelli.

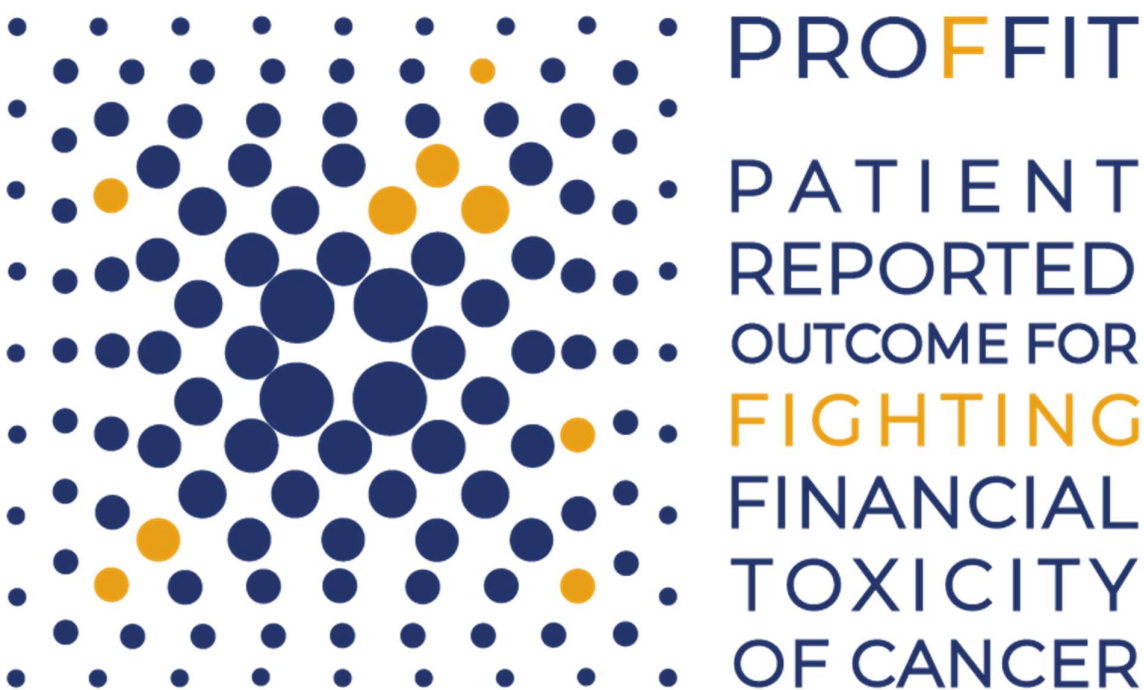



## Scoring procedure

Responses to PROFFIT items are coded in four categories of agreement with the statement of each item, scoring from 1 to 4:

1 - I do not agree at all, 2 - I agree partially, 3 - I agree substantially, 4 - I very much agree.

PROFFIT results are reported as a FT-score (including items #1 to #7) and nine separate items for FT determinants. All the scores are normalised to 0-100%, where 100 indicates the highest toxicity.

For **calculation of the FT-score**, including items #1 to #7, the following steps should be followed:

- Reverse the score for Item #1 according to the following formula

$$X_{1-reverse} = 5 - X_1$$

where  $X_1$  is the response given to item #1.

- Calculate the FT-score according to the following formula

$$\frac{X_{1-reverse} + X_2 + X_3 + X_4 + X_5 + X_6 + X_7 - Y}{3 \times Y} \times 100$$

where  $X$  is the response given for each item and  $Y$  is the number of items with valid response; if  $Y$  is 3 or less the score should be considered missing. At least 4 valid responses are needed to calculate the FT-score.

## Examples of calculation of FT score

| Item: response                                                                                                                                                                                                          | Intermediate                | Final FT score                                                     |
|-------------------------------------------------------------------------------------------------------------------------------------------------------------------------------------------------------------------------|-----------------------------|--------------------------------------------------------------------|
| Example 1                                                                                                                                                                                                               |                             |                                                                    |
| #1: I very much agree (4)<br>#2: I agree partially (2)<br>#3: I agree substantially (3)<br>#4: I do not agree at all (1)<br>#5: I agree partially (2)<br>#6: I agree substantially (3)<br>#7: I do not agree at all (1) | $X_{1-reverse} = 5 - 4 = 1$ | $\frac{1 + 2 + 3 + 1 + 2 + 3 + 1 - 7}{3 \times 7} \times 100 = 38$ |
| Example 2.                                                                                                                                                                                                              |                             |                                                                    |
| #1: I do not agree at all (1)<br>#2: I very much agree (4)<br>#3: I agree substantially (3)<br>#4: I agree substantially (3)<br>#5: I do not agree at all (1)<br>#6: I agree partially (2)<br>#7: MISSING               | $X_{1-reverse} = 5 - 1 = 4$ | $\frac{4 + 4 + 3 + 3 + 1 + 2 - 6}{3 \times 6} \times 100 = 61$     |

For calculation of the score for items #8, #14, #15 and #16 use the following formula

$$\frac{4 - X_j}{3} \times 100$$

where X is the response given and j is the item (8, 14, 15, or 16).

For calculation of the score for items #9, #10, #11, #12, #13 use the following formula

$$\frac{X_j - 1}{3} \times 100$$

where X is the response given and j is the item (9, 10, 11, 12 or 13).

### Examples of calculation of single determinants scores

| Item: response                 | Final single score               |
|--------------------------------|----------------------------------|
| Example 3.                     |                                  |
| #8: I do not agree at all (1)  | $\frac{4-1}{3} \times 100 = 100$ |
| #14: I agree substantially (3) | $\frac{4-3}{3} \times 100 = 33$  |
| Example 4.                     |                                  |
| #9: I very much agree (4)      | $\frac{4-1}{3} \times 100 = 100$ |
| #13: I agree partially (2)     | $\frac{2-1}{3} \times 100 = 33$  |

Table S1. List of items in the pre-final instrument

| <i>Item ID in the pre-final instrument</i> | <i>Item ID in the final instrument</i> | <i>Item</i>                                                                                                                                       |
|--------------------------------------------|----------------------------------------|---------------------------------------------------------------------------------------------------------------------------------------------------|
| Q1                                         |                                        | Ho rapidamente trovato la struttura dove curarmi                                                                                                  |
| Q2                                         |                                        | Il tempo necessario per la diagnosi è stato breve                                                                                                 |
| Q5                                         |                                        | Ho sentito molto il peso della burocrazia (ad esempio per prenotare visite o per usufruire di benefici assistenziali, previdenziali e lavorativi) |
| Q26                                        | 10                                     | Ho sostenuto spese per farmaci supplementari o integratori per la mia malattia                                                                    |
| Q27                                        | 9                                      | Ho sostenuto spese per una o più visite private per la mia malattia                                                                               |
| Q28                                        | 11                                     | Devo sostenere spese per cure integrative a mio carico (es. fisioterapia, psicoterapia, cure odontoiatriche)                                      |
| Q49                                        | 8                                      | Il Servizio Sanitario Nazionale copre tutti i costi sanitari associati alla mia malattia                                                          |
| Q68                                        | 1                                      | Sono in grado di sostenere le mie spese mensili senza difficoltà (ad esempio per affitto, elettricità, telefono...)                               |
| Q76                                        | 3                                      | Sono preoccupata/o dei problemi economici che potrei avere in futuro a causa della malattia                                                       |
| Q85                                        | 2                                      | La mia malattia ha ridotto le mie disponibilità economiche                                                                                        |
| Q86                                        | 4                                      | La mia condizione economica incide sulle mie possibilità di curarmi                                                                               |
| Q90                                        |                                        | I miei problemi economici mi preoccupano                                                                                                          |
| Q95                                        |                                        | La mia famiglia ha dovuto sostenere i costi di trasporto, vitto e alloggio per curarmi in una città diversa da quella in cui vivo                 |
| Q99                                        | 7                                      | Sono preoccupata/o di non riuscire a lavorare a causa della malattia                                                                              |
| Q102                                       |                                        | Ho perso molti giorni lavorativi a causa della mia malattia                                                                                       |
| Q103                                       |                                        | Non riesco a guadagnare come prima per via della mia malattia                                                                                     |
| Q106                                       |                                        | Ho dovuto smettere di lavorare a causa della mia malattia                                                                                         |
| Q107                                       |                                        | Ho ridotto le ore al lavoro a causa della mia malattia                                                                                            |
| Q111                                       | 14                                     | Il personale sanitario (cioè medici, infermieri, etc.) ha agevolato il percorso di cura                                                           |
| Q112                                       | 15                                     | Il personale ospedaliero amministrativo (cioè centro di prenotazione, segreterie, etc.) ha agevolato il percorso di cura                          |
| Q113                                       | 16                                     | C'è stata comunicazione tra i medici e le strutture sanitarie che mi seguono                                                                      |
| Q114                                       |                                        | Il medico di famiglia ha agevolato il percorso di cura                                                                                            |
| Q121                                       | 5                                      | Ho ridotto le spese per attività ricreative come vacanze, ristoranti o spettacoli per affrontare le spese della mia malattia                      |
| Q122                                       | 6                                      | Ho ridotto le spese per acquisti essenziali (ad esempio il cibo) per affrontare le spese per la mia malattia                                      |
| Q138                                       |                                        | I servizi di trasporto per raggiungere l'ospedale (mezzi pubblici, parcheggi) sono scarsi                                                         |
| Q139                                       |                                        | Ho dovuto sostenere i costi di trasporto, vitto e alloggio per curarmi in una città diversa da quella in cui vivo                                 |
| Q140                                       | 13                                     | Ho dovuto sostenere rilevanti costi di trasporto per curarmi                                                                                      |
| Q141                                       | 12                                     | Il centro di cura è lontano dalla mia abitazione                                                                                                  |
| Q151                                       |                                        | È stato facile ottenere le agevolazioni economiche a cui ho diritto (ad esempio esenzione dal ticket, assegni o pensioni di invalidità)           |
| Q156                                       |                                        | So che la mia malattia mi dà diritto ad agevolazioni economiche (ad esempio esenzione dal ticket, assegni o pensioni di invalidità)               |

## Questionnaire development

The first step of the analysis was estimating the between-item correlation matrix. Because of the ordinal nature of the items the pairwise Spearman rank correlation coefficients ( $r_s$ ) were used.

We ascertained that there were about a third (68/184, 37%) of missing responses for the five job items from patients, who declared themselves retired or jobless (i.e.

househusbands, housewives or individuals in search of employment); thus we decided to estimate two separate bivariate correlation matrices, one limited to job items, where only the 116 cases without missing information were used (**Table S2a below**), and one for all the other items, where the complete sample of 184 cases was used (**Table S2b below**).

For every pair, whose  $r_s > 0.65$ , the item with the greater score in the previously published importance analysis was retained.

At the end of this preliminary analysis, six items (Q103, Q106, Q107, Q90, Q95, Q139) were excluded, because  $r_s$  was greater than 0.65, leading to 9 outcome and 15 determinant items for subsequent analyses. Out of the five job items, two were retained, one outcome (Q99) and one determinant (Q102).

Table S2. Spearman correlation coefficients between items

Table S2a. Job items

|      | Q99  | Q102 | Q103 | Q106 | Q107 |
|------|------|------|------|------|------|
| Q99  | 1    |      |      |      |      |
| Q102 | 0,63 | 1    |      |      |      |
| Q103 | 0,72 | 0,66 | 1    |      |      |
| Q106 | 0,55 | 0,50 | 0,60 | 1    |      |
| Q107 | 0,56 | 0,67 | 0,67 | 0,78 | 1    |

Table S2b. All other items

|      | Q1    | Q2    | Q5    | Q26   | Q27   | Q28   | Q49   | Q68   | Q76   | Q85   | Q86   | Q90   | Q95   | Q111  | Q112  | Q113  | Q114  | Q121  | Q122  | Q138  | Q139  | Q140  | Q141  | Q151 | Q156 |
|------|-------|-------|-------|-------|-------|-------|-------|-------|-------|-------|-------|-------|-------|-------|-------|-------|-------|-------|-------|-------|-------|-------|-------|------|------|
| Q1   | 1     |       |       |       |       |       |       |       |       |       |       |       |       |       |       |       |       |       |       |       |       |       |       |      |      |
| Q2   | 0,29  | 1     |       |       |       |       |       |       |       |       |       |       |       |       |       |       |       |       |       |       |       |       |       |      |      |
| Q5   | -0,08 | -0,05 | 1     |       |       |       |       |       |       |       |       |       |       |       |       |       |       |       |       |       |       |       |       |      |      |
| Q26  | -0,18 | -0,13 | 0,22  | 1     |       |       |       |       |       |       |       |       |       |       |       |       |       |       |       |       |       |       |       |      |      |
| Q27  | -0,16 | -0,04 | 0,33  | 0,30  | 1     |       |       |       |       |       |       |       |       |       |       |       |       |       |       |       |       |       |       |      |      |
| Q28  | -0,07 | -0,03 | 0,40  | 0,36  | 0,40  | 1     |       |       |       |       |       |       |       |       |       |       |       |       |       |       |       |       |       |      |      |
| Q49  | 0,18  | 0,15  | -0,23 | -0,46 | -0,27 | -0,41 | 1     |       |       |       |       |       |       |       |       |       |       |       |       |       |       |       |       |      |      |
| Q68  | 0,09  | 0,15  | -0,03 | -0,25 | -0,09 | -0,13 | 0,34  | 1     |       |       |       |       |       |       |       |       |       |       |       |       |       |       |       |      |      |
| Q76  | -0,22 | -0,10 | 0,21  | 0,41  | 0,29  | 0,29  | -0,32 | -0,45 | 1     |       |       |       |       |       |       |       |       |       |       |       |       |       |       |      |      |
| Q85  | -0,18 | -0,04 | 0,27  | 0,46  | 0,31  | 0,37  | -0,41 | -0,41 | 0,65  | 1     |       |       |       |       |       |       |       |       |       |       |       |       |       |      |      |
| Q86  | -0,24 | -0,11 | 0,27  | 0,40  | 0,39  | 0,34  | -0,46 | -0,44 | 0,56  | 0,57  | 1     |       |       |       |       |       |       |       |       |       |       |       |       |      |      |
| Q90  | -0,21 | -0,15 | 0,16  | 0,34  | 0,22  | 0,26  | -0,29 | -0,53 | 0,71  | 0,67  | 0,70  | 1     |       |       |       |       |       |       |       |       |       |       |       |      |      |
| Q95  | -0,23 | -0,10 | 0,19  | 0,25  | 0,29  | 0,30  | -0,23 | -0,12 | 0,20  | 0,33  | 0,28  | 0,21  | 1     |       |       |       |       |       |       |       |       |       |       |      |      |
| Q111 | 0,35  | 0,25  | -0,26 | -0,26 | -0,30 | -0,29 | 0,38  | 0,14  | -0,11 | -0,17 | -0,31 | -0,13 | -0,17 | 1     |       |       |       |       |       |       |       |       |       |      |      |
| Q112 | 0,25  | 0,10  | -0,12 | -0,20 | -0,15 | -0,16 | 0,41  | 0,10  | -0,17 | -0,18 | -0,31 | -0,14 | -0,10 | 0,53  | 1     |       |       |       |       |       |       |       |       |      |      |
| Q113 | 0,21  | 0,13  | -0,20 | -0,05 | -0,45 | -0,22 | 0,22  | 0,00  | -0,11 | -0,07 | -0,22 | -0,15 | -0,11 | 0,43  | 0,33  | 1     |       |       |       |       |       |       |       |      |      |
| Q114 | 0,15  | 0,09  | -0,23 | -0,10 | -0,17 | -0,24 | 0,12  | 0,25  | -0,24 | -0,12 | -0,24 | -0,24 | 0,02  | 0,37  | 0,38  | 0,28  | 1     |       |       |       |       |       |       |      |      |
| Q121 | -0,21 | -0,15 | 0,12  | 0,31  | 0,36  | 0,28  | -0,21 | -0,41 | 0,57  | 0,59  | 0,48  | 0,62  | 0,28  | -0,06 | -0,09 | -0,17 | -0,10 | 1     |       |       |       |       |       |      |      |
| Q122 | -0,08 | -0,09 | 0,09  | 0,36  | 0,25  | 0,31  | -0,37 | -0,47 | 0,48  | 0,49  | 0,64  | 0,66  | 0,33  | -0,15 | -0,17 | -0,15 | -0,10 | 0,57  | 1     |       |       |       |       |      |      |
| Q138 | -0,08 | -0,05 | 0,28  | 0,25  | 0,22  | 0,27  | -0,30 | -0,17 | 0,24  | 0,34  | 0,31  | 0,31  | 0,08  | -0,24 | -0,23 | -0,03 | -0,15 | 0,18  | 0,34  | 1     |       |       |       |      |      |
| Q139 | -0,23 | -0,02 | 0,18  | 0,28  | 0,33  | 0,36  | -0,25 | -0,19 | 0,26  | 0,36  | 0,34  | 0,23  | 0,69  | -0,14 | -0,10 | -0,07 | -0,02 | 0,30  | 0,42  | 0,15  | 1     |       |       |      |      |
| Q140 | -0,17 | -0,04 | 0,27  | 0,30  | 0,33  | 0,29  | -0,27 | -0,21 | 0,28  | 0,41  | 0,33  | 0,31  | 0,59  | -0,20 | -0,10 | -0,02 | -0,04 | 0,38  | 0,45  | 0,27  | 0,66  | 1     |       |      |      |
| Q141 | -0,14 | 0,02  | 0,16  | 0,09  | 0,11  | 0,10  | -0,02 | -0,08 | 0,11  | 0,18  | 0,12  | 0,12  | 0,34  | -0,04 | 0,04  | 0,05  | -0,13 | 0,10  | 0,18  | 0,11  | 0,45  | 0,55  | 1     |      |      |
| Q151 | 0,10  | 0,11  | -0,15 | -0,21 | -0,15 | -0,11 | 0,27  | 0,24  | -0,20 | -0,29 | -0,29 | -0,24 | -0,09 | 0,18  | 0,20  | 0,17  | 0,20  | -0,22 | -0,21 | -0,10 | -0,18 | -0,18 | -0,07 | 1    |      |
| Q156 | 0,15  | 0,27  | -0,02 | -0,14 | -0,03 | -0,07 | 0,33  | 0,39  | -0,18 | -0,22 | -0,32 | -0,25 | -0,07 | 0,22  | 0,23  | 0,20  | 0,18  | -0,15 | -0,32 | -0,22 | -0,13 | -0,08 | 0,01  | 0,35 | 1    |

## Exploratory Factor Analysis (EFA)

### EFA on Outcome

EFA on the 9-outcome correlation matrix was performed by Principal Axis Factor (PAF) extraction option of SPSS, with VARIMAX rotation, in the sample of 116 subjects with complete information, because of the presence of the job item Q99.

The items considered at the start were Q5, Q68, Q76, Q85, Q86, Q99, Q121, Q122, Q151.

In the initial factor solution, three factors met the Kaiser criterion of eigenvalue  $>1$  and accounted for 66% of the variance, the first axis alone explaining 41% of the total variance (see Table and scree plot below).

| Factor | Total | % of variance | Cumulative % |
|--------|-------|---------------|--------------|
| 1      | 3.645 | 40.501        | 40.501       |
| 2      | 1.185 | 13.163        | 53.665       |
| 3      | 1.079 | 11.986        | 65.651       |
| 4      | 0.819 | 9.105         | 74.756       |
| 5      | 0.656 | 7.286         | 82.042       |
| 6      | 0.533 | 5.927         | 87.969       |
| 7      | 0.492 | 5.470         | 93.439       |
| 8      | 0.304 | 3.383         | 96.821       |
| 9      | 0.286 | 3.179         | 100.000      |

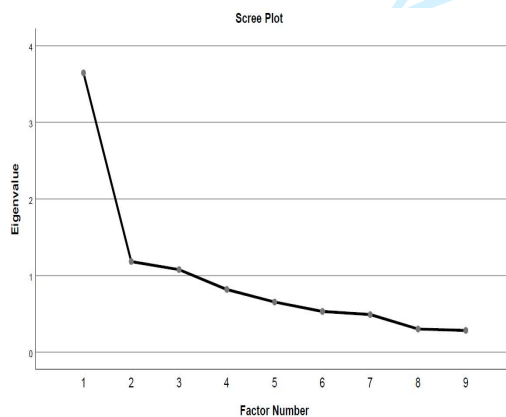

Communalities and unrotated factor loadings are reported in the table below.

|             | Communalities |            | Factor |        |        |
|-------------|---------------|------------|--------|--------|--------|
|             | Initial       | Extraction | 1      | 2      | 3      |
| <b>Q5</b>   | 0.133         | 0.31       | 0.261  | 0.203  | -0.448 |
| <b>Q68</b>  | 0.233         | 0.266      | -0.452 | 0.248  | -0.020 |
| <b>Q76</b>  | 0.574         | 0.653      | 0.793  | 0.152  | -0.027 |
| <b>Q85</b>  | 0.605         | 0.729      | 0.819  | 0.238  | 0.034  |
| <b>Q86</b>  | 0.510         | 0.677      | 0.723  | -0.305 | -0.248 |
| <b>Q99</b>  | 0.248         | 0.344      | 0.424  | 0.387  | 0.119  |
| <b>Q121</b> | 0.471         | 0.593      | 0.704  | 0.118  | 0.290  |
| <b>Q122</b> | 0.437         | 0.623      | 0.630  | -0.458 | 0.131  |
| <b>Q151</b> | 0.089         | 0.116      | -0.265 | -0.018 | 0.214  |

The item Q151 shows communality <0.20, Child 2006), and factor loadings <0.3 (Field, 2013) with all three factors, and was removed from further analyses.

Analogously at the next step the item Q5 was removed (communality = 0.072).

Eventually, seven items were retained with two factors meeting the Kaiser criterion of eigenvalue >1.

Communalities and factor loadings after Varimax rotation in the reduced sample of 116 patients are reported below. Many items cross loaded on both axes, that seemed both expression of financial burden: after rotation, the first one was more correlated with items mirroring an actual severe burden (Q68, Q86, Q122), while the second one appeared more correlated with worries about the future.

|             | Communalities |            | Factor |        |
|-------------|---------------|------------|--------|--------|
|             | Initial       | Extraction | 1      | 2      |
| <b>Q68</b>  | 0.222         | 0.269      | -0.498 | -0.145 |
| <b>Q76</b>  | 0.570         | 0.648      | 0.468  | 0.655  |
| <b>Q85</b>  | 0.600         | 0.737      | 0.413  | 0.753  |
| <b>Q86</b>  | 0.491         | 0.588      | 0.719  | 0.266  |
| <b>Q99</b>  | 0.247         | 0.356      | 0.012  | 0.596  |
| <b>Q121</b> | 0.470         | 0.510      | 0.397  | 0.594  |
| <b>Q122</b> | 0.426         | 0.566      | 0.735  | 0.159  |

The previous interpretation might imply that some correlation between axes would be expected. Thus, the oblique Promax rotation was applied. The same seven-item final solution was found with two factors meeting the Kaiser criterion of eigenvalue >1, and findings were reinforced. The factor loadings with Promax rotation are reported below.



|             | Factor |        |
|-------------|--------|--------|
|             | 1      | 2      |
| <b>Q68</b>  | -0.549 | 0.047  |
| <b>Q76</b>  | 0.248  | 0.616  |
| <b>Q85</b>  | 0.129  | 0.766  |
| <b>Q86</b>  | 0.764  | 0.004  |
| <b>Q99</b>  | -0.292 | 0.753  |
| <b>Q121</b> | 0.191  | 0.571  |
| <b>Q122</b> | 0.839  | -0.140 |

The same analysis was repeated in the whole sample, replacing the missing information on the Q99 job in the 68 cases with the average score of the other items. We did that, according to the protocol, for both increasing the power of the analysis and as a sensitivity analysis of findings in the restricted sample. We chose to input the average score rather than the minimum score (that would sound *I am not worried at all that I will not be able to work due to my illness*) because it could be true for retired people (at least in the Italian population), but not for younger people without job. We think, indeed, that imputing the minimum score would definitely bias the score toward the null, while imputing the average could possibly only slightly overestimate the financial issues. Further, this choice is consistent with the calculus of the score, where the missing items are not considered in the denominator. This question will be further dealt with in the next validation steps. In the full sample similar and stronger results were found: items Q151 and Q5 were removed because of low communalities (both <0.10). With the eventual 7-item analysis only the first axis met the Kaiser criterion of eigenvalue >1. Communalities and factor loadings in the complete sample are reported below. With one factor extracted no rotation was needed.

|             | Communalities |            | Factor |
|-------------|---------------|------------|--------|
|             | Initial       | Extraction |        |
| <b>Q68</b>  | 0.309         | 0.309      | -0.556 |
| <b>Q76</b>  | 0.555         | 0.622      | 0.788  |
| <b>Q85</b>  | 0.582         | 0.647      | 0.805  |
| <b>Q86</b>  | 0.534         | 0.547      | 0.739  |
| <b>Q99</b>  | 0.318         | 0.273      | 0.522  |
| <b>Q121</b> | 0.494         | 0.537      | 0.733  |
| <b>Q122</b> | 0.506         | 0.485      | 0.697  |

Therefore, the PROFFIT FT-score includes 7 outcome items.

## EFA on Determinants

EFA on the 15-outcome correlation matrix was performed by Principal Axis Factor (PAF) extraction option of SPSS, with VARIMAX rotation, in the sample of 116 subjects with complete information, because of the presence of the job item Q102.

The items considered at the start were Q1, Q2, Q26, Q27, Q28, Q49, Q102, Q111, Q112, Q113, Q114, Q138, Q140, Q141, Q156. In principle, the 15 determinants could be expression of three categories: (i) direct medical expenses (Q26, Q27, Q28, Q49), (ii) indirect costs due to travelling needs for medical care (Q138, Q140, Q141), (iii) indirect costs due to bureaucracy (Q1, Q2, Q111, Q112, Q113, Q114, Q156), plus a single job item (Q102).

In the initial factor solution, five factors met the Kaiser criterion of eigenvalue >1 and accounted for 62% of the variance (Table below), but the first axis explained only the 26% of the total variance.

| <b>Factor</b> | <b>Total</b> | <b>% of variance</b> | <b>Cumulative %</b> |
|---------------|--------------|----------------------|---------------------|
| <b>1</b>      | 3.869        | 25.793               | 25.793              |
| <b>2</b>      | 1.851        | 12.341               | 38.133              |
| <b>3</b>      | 1.403        | 9.356                | 47.490              |
| <b>4</b>      | 1.135        | 7.567                | 55.057              |
| <b>5</b>      | 1.041        | 6.943                | 62.000              |
| <b>6</b>      | 0.975        | 6.502                | 68.503              |
| <b>7</b>      | 0.825        | 5.501                | 74.004              |
| <b>8</b>      | 0.766        | 5.104                | 79.107              |
| <b>9</b>      | 0.664        | 4.425                | 83.532              |
| <b>10</b>     | 0.583        | 3.885                | 87.417              |
| <b>11</b>     | 0.554        | 3.696                | 91.113              |
| <b>12</b>     | 0.416        | 2.774                | 93.887              |
| <b>13</b>     | 0.364        | 2.426                | 96.313              |
| <b>14</b>     | 0.326        | 2.171                | 98.484              |
| <b>15</b>     | 0.227        | 1.516                | 100.000             |

The job item Q102 had the smallest communality (0.183) and was removed. All the other items had complete responses, thus it seemed meaningless to continue in the restricted sample, and the subsequent analysis was only performed in the complete sample, where all of the responses were available.

The initial factor solution with 14 items in the full sample is reported below. Almost nothing changed: five factors met the Kaiser criterion of eigenvalue >1 and accounted for 63% of the variance, and the first axis explained only the 26% of the total variance.

| Factor | Total | % of variance | Cumulative % |
|--------|-------|---------------|--------------|
| 1      | 3.571 | 25.508        | 25.508       |
| 2      | 1.712 | 12.232        | 37.740       |
| 3      | 1.290 | 9.211         | 46.951       |
| 4      | 1.223 | 8.733         | 55.684       |
| 5      | 1.078 | 7.703         | 63.387       |
| 6      | 0.869 | 6.207         | 69.594       |
| 7      | 0.776 | 5.543         | 75.136       |
| 8      | 0.735 | 5.253         | 80.389       |
| 9      | 0.649 | 4.635         | 85.023       |
| 10     | 0.554 | 3.954         | 88.978       |
| 11     | 0.451 | 3.219         | 92.197       |
| 12     | 0.413 | 2.949         | 95.146       |
| 13     | 0.373 | 2.662         | 97.808       |
| 14     | 0.307 | 2.192         | 100.000      |

At the next steps items Q1, Q2, Q156, Q138 and Q114 were removed in turn because of small communalities, leading to the final solution with nine items and four factors retained. Communalities and factor loadings in the complete sample are reported below.

|      | Communalities |            | Factor |        |        |        |
|------|---------------|------------|--------|--------|--------|--------|
|      | Initial       | Extraction | 1      | 2      | 3      | 4      |
| Q26  | 0.305         | 0.425      | 0.628  | -0.113 | 0.124  | 0.050  |
| Q27  | 0.374         | 0.597      | 0.350  | 0.010  | 0.183  | 0.664  |
| Q28  | 0.335         | 0.453      | 0.604  | -0.048 | 0.137  | 0.259  |
| Q49  | 0.393         | 0.576      | -0.660 | 0.372  | -0.012 | -0.045 |
| Q111 | 0.369         | 0.487      | -0.210 | 0.592  | -0.081 | -0.294 |
| Q112 | 0.333         | 0.610      | -0.144 | 0.765  | 0.039  | -0.049 |
| Q113 | 0.319         | 0.556      | 0.001  | 0.332  | 0.059  | -0.665 |
| Q140 | 0.426         | 0.741      | 0.283  | -0.069 | 0.803  | 0.105  |
| Q141 | 0.316         | 0.449      | 0.009  | 0.033  | 0.669  | 0.005  |

Seemingly the first axis is related to direct medical expenses, the second axis to health bureaucracy items and the third axis to travelling costs, but some cross load on the factors is present.

Therefore we decided to retain the nine determinant items as single items in the final questionnaire.

## Convergent validity

We said above that the PROFFIT FT-score includes 7 outcome items. In the table below correlation between each item and the total score of the scale, removing that item from the sum (convergent validity), is reported. Correlations are quite good, all  $r_s$  being greater than 0.5 in the full sample.

Table S3. Spearman correlation coefficients between each item and total score\*

| Item number | Full sample (N=184) | Restricted sample (N=116) |
|-------------|---------------------|---------------------------|
| 1           | 0.5325              | 0.5243                    |
| 2           | 0.7360              | 0.7267                    |
| 3           | 0.7251              | 0.7158                    |
| 4           | 0.6646              | 0.6559                    |
| 5           | 0.6887              | 0.6765                    |
| 6           | 0.6712              | 0.6626                    |
| 7           | 0.5537              | 0.3684                    |

\*calculated removing each item from the sum

## Repeatability

Agreement between repeated measurements was assessed by intra-class correlation coefficient (ICC) and weighted Cohen's Kappa coefficient. Scores were stable enough over time, with ICCs ranging from 0.56 and 0.79. ICC was equal to 0.81 for the FT-score.

Table S4. Test-retest results

|                          | ICC         | Weighted K  | Agreement % |
|--------------------------|-------------|-------------|-------------|
| <b>Outcome items</b>     |             |             |             |
| Item 1                   | 0.70        | 0.70        | 95.7        |
| Item 2                   | 0.68        | 0.68        | 93.7        |
| Item 3                   | 0.56        | 0.56        | 90.7        |
| Item 4                   | 0.64        | 0.64        | 93.2        |
| Item 5                   | 0.65        | 0.65        | 91.0        |
| Item 6                   | 0.65        | 0.65        | 93.9        |
| Item 7                   | 0.79        | 0.81        | 94.4        |
| <b>FT-score</b>          | <b>0.81</b> | <b>0.82</b> | <b>97.4</b> |
| <b>Determinant items</b> |             |             |             |
| Item 8                   | 0.61        | 0.61        | 94.4        |
| Item 9                   | 0.72        | 0.72        | 94.2        |
| Item 10                  | 0.65        | 0.65        | 93.0        |
| Item 11                  | 0.61        | 0.62        | 92.4        |
| Item 12                  | 0.79        | 0.79        | 96.6        |
| Item 13                  | 0.78        | 0.78        | 92.2        |
| Item 14                  | 0.53        | 0.52        | 96.5        |
| Item 15                  | 0.59        | 0.58        | 95.0        |
| Item 16                  | 0.61        | 0.61        | 93.9        |

Table S5. Association of FT score with baseline characteristics of patients

|                                                          | Median      | (IQR)              | P (Mann-Whitney) |
|----------------------------------------------------------|-------------|--------------------|------------------|
| <b>All patients</b>                                      | 38.1        | (23.8-57.1)        |                  |
| <b>Region of the hospital</b>                            |             |                    | <b>0.005</b>     |
| North                                                    | <b>28.6</b> | <b>(14.3-47.6)</b> |                  |
| Center                                                   | <b>33.3</b> | <b>(23.8-61.9)</b> |                  |
| South                                                    | <b>42.9</b> | <b>(23.8-57.1)</b> |                  |
| Islands                                                  | <b>52.4</b> | <b>(33.3-57.1)</b> |                  |
| <b>Gender</b>                                            |             |                    | 0.932            |
| Female                                                   | 38.1        | (23.8-57.1)        |                  |
| Male                                                     | 33.3        | (23.8-52.4)        |                  |
| <b>Age category</b>                                      |             |                    | <b>0.005</b>     |
| ≤65                                                      | <b>42.9</b> | <b>(23.8-57.1)</b> |                  |
| >65                                                      | <b>26.2</b> | <b>(14.3-47.6)</b> |                  |
| <b>Education level</b>                                   |             |                    | <b>0.018</b>     |
| Elementary/Middle school                                 | <b>42.9</b> | <b>(23.8-57.1)</b> |                  |
| High school/degree                                       | <b>33.3</b> | <b>(19.0-50.0)</b> |                  |
| <b>Cohabitant/Married</b>                                |             |                    | 0.298            |
| No                                                       | 33.3        | (23.8-52.4)        |                  |
| Yes                                                      | 38.1        | (23.8-57.1)        |                  |
| <b>With dependent family members</b>                     |             |                    | 0.060            |
| No                                                       | 33.3        | (19.0-52.4)        |                  |
| Yes                                                      | 42.9        | (28.6-57.1)        |                  |
| <b>Family members with cancer or chronic disease</b>     |             |                    | <b>0.017</b>     |
| No                                                       | <b>31.0</b> | <b>(19.0-52.4)</b> |                  |
| Yes                                                      | <b>42.9</b> | <b>(23.8-57.1)</b> |                  |
| <b>Working status</b>                                    |             |                    | 0.531            |
| Not working                                              | 33.3        | (19.0-52.4)        |                  |
| Working                                                  | 38.1        | (23.8-57.1)        |                  |
| <b>Site of treatment</b>                                 |             |                    | 0.134            |
| Within the region of residency                           | 38.1        | (23.8-57.1)        |                  |
| Outside the region of residency                          | 28.6        | (19.0-42.9)        |                  |
| <b>Time (years) from initial diagnosis</b>               |             |                    | 0.920            |
| ≤1                                                       | 38.1        | (23.8-57.1)        |                  |
| 1-5                                                      | 33.3        | (23.8-52.4)        |                  |
| ≥5                                                       | 33.3        | (19.0-61.9)        |                  |
| <b>Previous surgery</b>                                  |             |                    | 0.175            |
| No                                                       | 42.9        | (23.8-61.9)        |                  |
| Yes                                                      | 33.3        | (23.8-52.4)        |                  |
| <b>Last/ongoing anticancer treatment at registration</b> |             |                    | 0.546            |
| Chemotherapy                                             | 38.1        | (23.8-57.1)        |                  |
| Target-based agents                                      | 40.5        | (23.8-52.4)        |                  |
| Immunotherapy                                            | 28.6        | (9.5-47.6)         |                  |
| Hormonal therapy                                         | 38.1        | (33.3-42.9)        |                  |
| Radiotherapy                                             | 28.6        | (28.6-28.6)        |                  |

# Reporting checklist for cross sectional study.

Based on the STROBE cross sectional guidelines.

## Instructions to authors

Complete this checklist by entering the page numbers from your manuscript where readers will find each of the items listed below.

Your article may not currently address all the items on the checklist. Please modify your text to include the missing information. If you are certain that an item does not apply, please write "n/a" and provide a short explanation.

Upload your completed checklist as an extra file when you submit to a journal.

In your methods section, say that you used the STROBE cross sectional reporting guidelines, and cite them as:

von Elm E, Altman DG, Egger M, Pocock SJ, Gøtzsche PC, Vandenbroucke JP. The Strengthening the Reporting of Observational Studies in Epidemiology (STROBE) Statement: guidelines for reporting observational studies.

|                           | Reporting Item                                                                                                      | Page Number |
|---------------------------|---------------------------------------------------------------------------------------------------------------------|-------------|
| <b>Title and abstract</b> |                                                                                                                     |             |
| Title                     | <a href="#">#1a</a> Indicate the study's design with a commonly used term in the title or the abstract              | 1           |
| Abstract                  | <a href="#">#1b</a> Provide in the abstract an informative and balanced summary of what was done and what was found | 3-4         |

|    |                      |                                                            |     |
|----|----------------------|------------------------------------------------------------|-----|
| 1  | <b>Introduction</b>  |                                                            |     |
| 2  |                      |                                                            |     |
| 3  |                      |                                                            |     |
| 4  | Background /         | <a href="#">#2</a>                                         | 5   |
| 5  |                      |                                                            |     |
| 6  | rationale            |                                                            |     |
| 7  |                      | Explain the scientific background and rationale for the    |     |
| 8  |                      | investigation being reported                               |     |
| 9  |                      |                                                            |     |
| 10 | Objectives           | <a href="#">#3</a>                                         | 5   |
| 11 |                      | State specific objectives, including any prespecified      |     |
| 12 |                      | hypotheses                                                 |     |
| 13 |                      |                                                            |     |
| 14 |                      |                                                            |     |
| 15 | <b>Methods</b>       |                                                            |     |
| 16 |                      |                                                            |     |
| 17 |                      |                                                            |     |
| 18 | Study design         | <a href="#">#4</a>                                         | 6   |
| 19 |                      | Present key elements of study design early in the paper    |     |
| 20 |                      |                                                            |     |
| 21 | Setting              | <a href="#">#5</a>                                         | 11  |
| 22 |                      | Describe the setting, locations, and relevant dates,       |     |
| 23 |                      | including periods of recruitment, exposure, follow-up,     |     |
| 24 |                      | and data collection                                        |     |
| 25 |                      |                                                            |     |
| 26 |                      |                                                            |     |
| 27 |                      |                                                            |     |
| 28 |                      |                                                            |     |
| 29 | Eligibility criteria | <a href="#">#6a</a>                                        | 6   |
| 30 |                      | Give the eligibility criteria, and the sources and methods |     |
| 31 |                      | of selection of participants.                              |     |
| 32 |                      |                                                            |     |
| 33 |                      |                                                            |     |
| 34 |                      | <a href="#">#7</a>                                         | 6   |
| 35 |                      | Clearly define all outcomes, exposures, predictors,        |     |
| 36 |                      | potential confounders, and effect modifiers. Give          |     |
| 37 |                      | diagnostic criteria, if applicable                         |     |
| 38 |                      |                                                            |     |
| 39 |                      |                                                            |     |
| 40 |                      |                                                            |     |
| 41 |                      |                                                            |     |
| 42 | Data sources /       | <a href="#">#8</a>                                         | 6   |
| 43 |                      | For each variable of interest give sources of data and     |     |
| 44 | measurement          |                                                            |     |
| 45 |                      | details of methods of assessment (measurement).            |     |
| 46 |                      | Describe comparability of assessment methods if there      |     |
| 47 |                      | is more than one group. Give information separately for    |     |
| 48 |                      | for exposed and unexposed groups if applicable.            |     |
| 49 |                      |                                                            |     |
| 50 |                      |                                                            |     |
| 51 |                      |                                                            |     |
| 52 |                      |                                                            |     |
| 53 |                      |                                                            |     |
| 54 | Bias                 | <a href="#">#9</a>                                         | 7-8 |
| 55 |                      | Describe any efforts to address potential sources of       |     |
| 56 |                      | bias                                                       |     |
| 57 |                      |                                                            |     |
| 58 |                      |                                                            |     |
| 59 |                      |                                                            |     |
| 60 |                      |                                                            |     |



|    |                |                      |                                                            |     |
|----|----------------|----------------------|------------------------------------------------------------|-----|
| 1  | Study size     | <a href="#">#10</a>  | Explain how the study size was arrived at                  | 6   |
| 2  |                |                      |                                                            |     |
| 3  |                |                      |                                                            |     |
| 4  | Quantitative   | <a href="#">#11</a>  | Explain how quantitative variables were handled in the     | 7   |
| 5  | variables      |                      | analyses. If applicable, describe which groupings were     |     |
| 6  |                |                      | chosen, and why                                            |     |
| 7  |                |                      |                                                            |     |
| 8  |                |                      |                                                            |     |
| 9  |                |                      |                                                            |     |
| 10 |                |                      |                                                            |     |
| 11 |                |                      |                                                            |     |
| 12 | Statistical    | <a href="#">#12a</a> | Describe all statistical methods, including those used to  | 7-8 |
| 13 | methods        |                      | control for confounding                                    |     |
| 14 |                |                      |                                                            |     |
| 15 |                |                      |                                                            |     |
| 16 |                |                      |                                                            |     |
| 17 | Statistical    | <a href="#">#12b</a> | Describe any methods used to examine subgroups and         | 7-8 |
| 18 | methods        |                      | interactions                                               |     |
| 19 |                |                      |                                                            |     |
| 20 |                |                      |                                                            |     |
| 21 |                |                      |                                                            |     |
| 22 |                |                      |                                                            |     |
| 23 | Statistical    | <a href="#">#12c</a> | Explain how missing data were addressed                    | 8   |
| 24 | methods        |                      |                                                            |     |
| 25 |                |                      |                                                            |     |
| 26 |                |                      |                                                            |     |
| 27 |                |                      |                                                            |     |
| 28 | Statistical    | <a href="#">#12d</a> | If applicable, describe analytical methods taking          | 8   |
| 29 | methods        |                      | account of sampling strategy                               |     |
| 30 |                |                      |                                                            |     |
| 31 |                |                      |                                                            |     |
| 32 |                |                      |                                                            |     |
| 33 | Statistical    | <a href="#">#12e</a> | Describe any sensitivity analyses                          | 7-8 |
| 34 | methods        |                      |                                                            |     |
| 35 |                |                      |                                                            |     |
| 36 |                |                      |                                                            |     |
| 37 |                |                      |                                                            |     |
| 38 |                |                      |                                                            |     |
| 39 | <b>Results</b> |                      |                                                            |     |
| 40 |                |                      |                                                            |     |
| 41 |                |                      |                                                            |     |
| 42 | Participants   | <a href="#">#13a</a> | Report numbers of individuals at each stage of study—      | 11  |
| 43 |                |                      | eg numbers potentially eligible, examined for eligibility, |     |
| 44 |                |                      | confirmed eligible, included in the study, completing      |     |
| 45 |                |                      | follow-up, and analysed. Give information separately for   |     |
| 46 |                |                      | for exposed and unexposed groups if applicable.            |     |
| 47 |                |                      |                                                            |     |
| 48 |                |                      |                                                            |     |
| 49 |                |                      |                                                            |     |
| 50 |                |                      |                                                            |     |
| 51 |                |                      |                                                            |     |
| 52 |                |                      |                                                            |     |
| 53 |                |                      |                                                            |     |
| 54 | Participants   | <a href="#">#13b</a> | Give reasons for non-participation at each stage           | 11  |
| 55 |                |                      |                                                            |     |
| 56 |                |                      |                                                            |     |
| 57 |                |                      |                                                            |     |
| 58 |                |                      |                                                            |     |
| 59 |                |                      |                                                            |     |
| 60 |                |                      |                                                            |     |

|    |                  |                      |                                                              |                |
|----|------------------|----------------------|--------------------------------------------------------------|----------------|
| 1  | Participants     | <a href="#">#13c</a> | Consider use of a flow diagram                               | Considered     |
| 2  |                  |                      |                                                              |                |
| 3  |                  |                      |                                                              |                |
| 4  |                  |                      |                                                              | but deemed     |
| 5  |                  |                      |                                                              |                |
| 6  |                  |                      |                                                              | useless        |
| 7  |                  |                      |                                                              |                |
| 8  |                  |                      |                                                              |                |
| 9  | Descriptive data | <a href="#">#14a</a> | Give characteristics of study participants (eg               | 11 (Table 1)   |
| 10 |                  |                      | demographic, clinical, social) and information on            |                |
| 11 |                  |                      | exposures and potential confounders. Give information        |                |
| 12 |                  |                      | separately for exposed and unexposed groups if               |                |
| 13 |                  |                      | applicable.                                                  |                |
| 14 |                  |                      |                                                              |                |
| 15 |                  |                      |                                                              |                |
| 16 |                  |                      |                                                              |                |
| 17 |                  |                      |                                                              |                |
| 18 |                  |                      |                                                              |                |
| 19 |                  |                      |                                                              |                |
| 20 |                  |                      |                                                              |                |
| 21 | Descriptive data | <a href="#">#14b</a> | Indicate number of participants with missing data for        | 11             |
| 22 |                  |                      | each variable of interest                                    |                |
| 23 |                  |                      |                                                              |                |
| 24 |                  |                      |                                                              |                |
| 25 |                  |                      |                                                              |                |
| 26 | Outcome data     | <a href="#">#15</a>  | Report numbers of outcome events or summary                  | Not applicable |
| 27 |                  |                      | measures. Give information separately for exposed and        |                |
| 28 |                  |                      | unexposed groups if applicable.                              |                |
| 29 |                  |                      |                                                              |                |
| 30 |                  |                      |                                                              |                |
| 31 |                  |                      |                                                              |                |
| 32 |                  |                      |                                                              |                |
| 33 |                  |                      |                                                              |                |
| 34 | Main results     | <a href="#">#16a</a> | Give unadjusted estimates and, if applicable,                | Not applicable |
| 35 |                  |                      | confounder-adjusted estimates and their precision (eg,       |                |
| 36 |                  |                      | 95% confidence interval). Make clear which                   |                |
| 37 |                  |                      | confounders were adjusted for and why they were              |                |
| 38 |                  |                      | included                                                     |                |
| 39 |                  |                      |                                                              |                |
| 40 |                  |                      |                                                              |                |
| 41 |                  |                      |                                                              |                |
| 42 |                  |                      |                                                              |                |
| 43 |                  |                      |                                                              |                |
| 44 |                  |                      |                                                              |                |
| 45 |                  |                      |                                                              |                |
| 46 | Main results     | <a href="#">#16b</a> | Report category boundaries when continuous variables         | Not applicable |
| 47 |                  |                      | were categorized                                             |                |
| 48 |                  |                      |                                                              |                |
| 49 |                  |                      |                                                              |                |
| 50 |                  |                      |                                                              |                |
| 51 | Main results     | <a href="#">#16c</a> | If relevant, consider translating estimates of relative risk | Not applicable |
| 52 |                  |                      | into absolute risk for a meaningful time period              |                |
| 53 |                  |                      |                                                              |                |
| 54 |                  |                      |                                                              |                |
| 55 |                  |                      |                                                              |                |
| 56 |                  |                      |                                                              |                |
| 57 |                  |                      |                                                              |                |
| 58 |                  |                      |                                                              |                |
| 59 |                  |                      |                                                              |                |
| 60 |                  |                      |                                                              |                |

|    |                          |                     |                                                            |       |
|----|--------------------------|---------------------|------------------------------------------------------------|-------|
| 1  | Other analyses           | <a href="#">#17</a> | Report other analyses done—e.g., analyses of               | 11-13 |
| 2  |                          |                     |                                                            |       |
| 3  |                          |                     |                                                            |       |
| 4  |                          |                     | subgroups and interactions, and sensitivity analyses       |       |
| 5  |                          |                     |                                                            |       |
| 6  |                          |                     |                                                            |       |
| 7  | <b>Discussion</b>        |                     |                                                            |       |
| 8  |                          |                     |                                                            |       |
| 9  |                          |                     |                                                            |       |
| 10 | Key results              | <a href="#">#18</a> | Summarise key results with reference to study              | 15    |
| 11 |                          |                     | objectives                                                 |       |
| 12 |                          |                     |                                                            |       |
| 13 |                          |                     |                                                            |       |
| 14 |                          |                     |                                                            |       |
| 15 | Limitations              | <a href="#">#19</a> | Discuss limitations of the study, taking into account      | 16-17 |
| 16 |                          |                     | sources of potential bias or imprecision. Discuss both     |       |
| 17 |                          |                     | direction and magnitude of any potential bias.             |       |
| 18 |                          |                     |                                                            |       |
| 19 |                          |                     |                                                            |       |
| 20 |                          |                     |                                                            |       |
| 21 |                          |                     |                                                            |       |
| 22 |                          |                     |                                                            |       |
| 23 | Interpretation           | <a href="#">#20</a> | Give a cautious overall interpretation considering         | 15-16 |
| 24 |                          |                     | objectives, limitations, multiplicity of analyses, results |       |
| 25 |                          |                     | from similar studies, and other relevant evidence.         |       |
| 26 |                          |                     |                                                            |       |
| 27 |                          |                     |                                                            |       |
| 28 |                          |                     |                                                            |       |
| 29 |                          |                     |                                                            |       |
| 30 | Generalisability         | <a href="#">#21</a> | Discuss the generalisability (external validity) of the    | 18    |
| 31 |                          |                     | study results                                              |       |
| 32 |                          |                     |                                                            |       |
| 33 |                          |                     |                                                            |       |
| 34 |                          |                     |                                                            |       |
| 35 |                          |                     |                                                            |       |
| 36 | <b>Other Information</b> |                     |                                                            |       |
| 37 |                          |                     |                                                            |       |
| 38 |                          |                     |                                                            |       |
| 39 | Funding                  | <a href="#">#22</a> | Give the source of funding and the role of the funders     | 22    |
| 40 |                          |                     | for the present study and, if applicable, for the original |       |
| 41 |                          |                     | study on which the present article is based                |       |
| 42 |                          |                     |                                                            |       |
| 43 |                          |                     |                                                            |       |
| 44 |                          |                     |                                                            |       |
| 45 |                          |                     |                                                            |       |

46 None The STROBE checklist is distributed under the terms of the Creative Commons Attribution  
47 License CC-BY. This checklist can be completed online using <https://www.goodreports.org/>, a tool  
48 made by the [EQUATOR Network](#) in collaboration with [Penelope.ai](#)  
49  
50  
51  
52  
53  
54  
55  
56  
57  
58  
59
