# Supplementary material for: Cross-sectional study to develop and describe psychometric characteristics of a patient-reported instrument (PROFFIT) for measuring financial toxicity of cancer within a public healthcare system
Source: PubMed Central journal article supplement — BMJ Open. 2021 Oct 20;11(10):e049128. doi: 10.1136/bmjopen-2021-049128 (PMC8529986; doi:10.1136/bmjopen-2021-049128), 2021-10-20
Supplement: bmjopen-2021-049128supp001.pdf [file bmjopen-2021-049128supp001.pdf]

## **A cross-sectional study to develop and describe psychometric characteristics of a patient-reported instrument (PROFFIT) for measuring financial toxicity of cancer within a public healthcare system**

### **Appendix**

#### **Index**

|                                                                                      |    |
|--------------------------------------------------------------------------------------|----|
| Steering Committee and participating Investigators.....                              | 2  |
| Scoring procedure .....                                                              | 4  |
| Examples of calculation of FT score.....                                             | 5  |
| Examples of calculation of single determinants scores .....                          | 6  |
| Table S1. List of items in the pre-final instrument .....                            | 7  |
| Questionnaire development.....                                                       | 8  |
| Table S2. Spearman correlation coefficients between items .....                      | 9  |
| Table S2a. Job items.....                                                            | 9  |
| Table S2b. All other items .....                                                     | 9  |
| Exploratory Factor Analysis (EFA).....                                               | 10 |
| EFA on Outcome.....                                                                  | 10 |
| EFA on Determinants .....                                                            | 13 |
| Convergent validity .....                                                            | 15 |
| Table S3. Spearman correlation coefficients between each item and total score* ..... | 15 |
| Repeatability .....                                                                  | 16 |
| Table S4. Test-retest results.....                                                   | 16 |
| Table S5. Association of FT score with baseline characteristics of patients .....    | 17 |

## Steering Committee and participating Investigators

The PROFFIT Steering Committee includes: Francesco Perrone, Jane Bryce, Ciro Gallo, Silvia Riva, Fabio Efficace, Francesco De Lorenzo, Elisabetta Iannelli, Laura Del Campo, Francesca Tracò, Massimo Di Maio (also as representative of AIOM – Associazione Italiana di Oncologia Medica), Luciano Frontini, Vincenzo Montesarchio (also as representative of CIPOMO – Collegio Italiano dei Primari di Oncologia Medica Ospedalieri), Diana Giannarelli, Lara Gitto, Claudio Jommi, Concetta Maria Vaccaro.

We acknowledge the contribution of the other personnel working at the Unità Sperimentazioni Cliniche of the Istituto Nazionale per lo Studio e la Cura dei Tumori, IRCCS Fondazione Pascale of Napoli: Adriano Gravina, Clorinda Schettino, Piera Gargiulo, Lucia Sparavigna, Giuliana Canzanella, Fiorella Romano, Valentina Barbato, Manuela Florio, Simona Bevilacqua, Gaetano Buonfanti, Alfonso Savio, Antonia Del Giudice, Teresa Ribecco, Marilena Martino, Giovanni De Matteis.

The following personnel contributed to the project at the participating centers:

- Istituto Nazionale Tumori - IRCCS – Fondazione G.Pascale, Napoli: Daniela Barberio, Ermelinda Quarata, Maria Florencia Gonzalez Leone, Gessica Migliaccio, Francesca Laudato, Maria Rosaria Esposito
- AO Ordine Mauriziano - S.C.D.U Oncologia Medica, Torino: Gaetano Lacidogna, Elisa Sperti, Francesca Vignani, Donatella Marino, Sabrina Terzolo, Luisa Fusco, Annalisa Bellezza, Laura Polimeno
- UOS Biostatistica - Istituto Regina Elena, Roma (Diana Giannarelli, Filomena Spasiano, Luana Fotia, Barbara Matrasci)
- U.O.C. Oncologia Medica A.O. Garibaldi, Catania (Roberto Bordonaro, Stefano Cordio, Concetta Sergi, Fabrizio Castagna, Francesco Avola, Laura Longhitano, Desiree Caudullo)
- U.O.C. Oncologia Medica - Ospedale Senatore Antonio Perrino, Brindisi (Saverio Cinieri, Manuela Caloro, Laura Orlando, Dario Loparco)
- Oncologia Medica 2 - IRCCS AOU San Martino - IST, Genova (Lucia Del Mastro)
- AO Ordine Mauriziano - S.C.D.U Oncologia Medica, Torino (Massimo Di Maio)
- U.O.C. Oncologia - Presidio Monaldi - AORN dei Colli, Napoli (Vincenzo Montesarchio, Giusy Petrillo)

- Unità operativa complessa di Oncologia Medica - AOU di Sassari (Antonio Pazzola, Alessio Aligi Cogoni)
- Oncologia traslazionale – I.R.C.C.S. Istituti Clinici Scientifici Maugeri, Pavia (Camillo Porta)
- U.O.C. Oncologia 1, Istituto Oncologico Veneto, IOV, IRCCS Padova (Vittorina Zagonel, Eleonora Bergo).

Italian to English translation was done thank to the voluntary contribution of Iain Halliday, Salvo Ciancitto, and Francesca Vigo (University of Catania, Dipartimento di Scienze Umanistiche), and Daniel Matheson (freelance translator).

A graphic logo (see below) has been created thanks to the voluntary contribution of Valeria Lepore, Pierpaola Borzacchiello, and Carla Langella (director), Design per la Valorizzazione Scientifica, Università della Campania Luigi Vanvitelli.

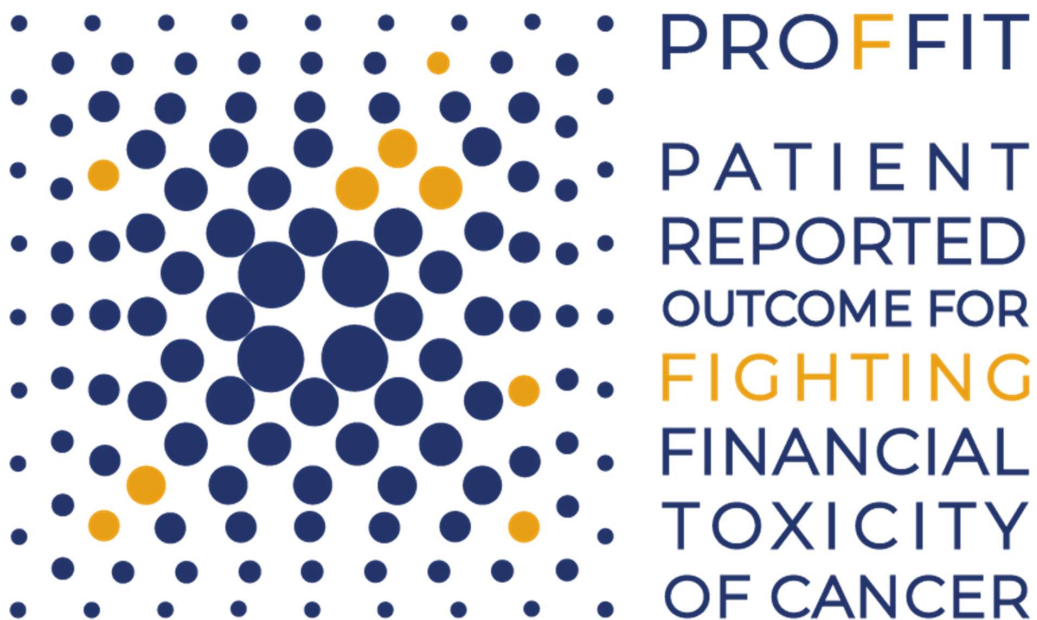

## Scoring procedure

Responses to PROFFIT items are coded in four categories of agreement with the statement of each item, scoring from 1 to 4:

1 - I do not agree at all, 2 - I agree partially, 3 - I agree substantially, 4 - I very much agree.

PROFFIT results are reported as a FT-score (including items #1 to #7) and nine separate items for FT determinants. All the scores are normalised to 0-100%, where 100 indicates the highest toxicity.

For **calculation of the FT-score**, including items #1 to #7, the following steps should be followed:

- Reverse the score for Item #1 according to the following formula

$$X_{1-reverse} = 5 - X_1$$

where  $X_1$  is the response given to item #1.

- Calculate the FT-score according to the following formula

$$\frac{X_{1-reverse} + X_2 + X_3 + X_4 + X_5 + X_6 + X_7 - Y}{3 \times Y} \times 100$$

where  $X$  is the response given for each item and  $Y$  is the number of items with valid response; if  $Y$  is 3 or less the score should be considered missing. At least 4 valid responses are needed to calculate the FT-score.

## Examples of calculation of FT score

| Item: response                                                                                                                                                                                                          | Intermediate                | Final FT score                                                     |
|-------------------------------------------------------------------------------------------------------------------------------------------------------------------------------------------------------------------------|-----------------------------|--------------------------------------------------------------------|
| Example 1                                                                                                                                                                                                               |                             |                                                                    |
| #1: I very much agree (4)<br>#2: I agree partially (2)<br>#3: I agree substantially (3)<br>#4: I do not agree at all (1)<br>#5: I agree partially (2)<br>#6: I agree substantially (3)<br>#7: I do not agree at all (1) | $X_{1-reverse} = 5 - 4 = 1$ | $\frac{1 + 2 + 3 + 1 + 2 + 3 + 1 - 7}{3 \times 7} \times 100 = 38$ |
| Example 2.                                                                                                                                                                                                              |                             |                                                                    |
| #1: I do not agree at all (1)<br>#2: I very much agree (4)<br>#3: I agree substantially (3)<br>#4: I agree substantially (3)<br>#5: I do not agree at all (1)<br>#6: I agree partially (2)<br>#7: MISSING               | $X_{1-reverse} = 5 - 1 = 4$ | $\frac{4 + 4 + 3 + 3 + 1 + 2 - 6}{3 \times 6} \times 100 = 61$     |

For calculation of the score for items #8, #14, #15 and #16 use the following formula

$$\frac{4 - X_j}{3} \times 100$$

where X is the response given and j is the item (8, 14, 15, or 16).

For calculation of the score for items #9, #10, #11, #12, #13 use the following formula

$$\frac{X_j - 1}{3} \times 100$$

where X is the response given and j is the item (9, 10, 11, 12 or 13).

### Examples of calculation of single determinants scores

| Item: response                 | Final single score               |
|--------------------------------|----------------------------------|
| Example 3.                     |                                  |
| #8: I do not agree at all (1)  | $\frac{4-1}{3} \times 100 = 100$ |
| #14: I agree substantially (3) | $\frac{4-3}{3} \times 100 = 33$  |
| Example 4.                     |                                  |
| #9: I very much agree (4)      | $\frac{4-1}{3} \times 100 = 100$ |
| #13: I agree partially (2)     | $\frac{2-1}{3} \times 100 = 33$  |

Table S1. List of items in the pre-final instrument

| <i>Item ID in the pre-final instrument</i> | <i>Item ID in the final instrument</i> | <i>Item</i>                                                                                                                                       |
|--------------------------------------------|----------------------------------------|---------------------------------------------------------------------------------------------------------------------------------------------------|
| Q1                                         |                                        | Ho rapidamente trovato la struttura dove curarmi                                                                                                  |
| Q2                                         |                                        | Il tempo necessario per la diagnosi è stato breve                                                                                                 |
| Q5                                         |                                        | Ho sentito molto il peso della burocrazia (ad esempio per prenotare visite o per usufruire di benefici assistenziali, previdenziali e lavorativi) |
| Q26                                        | 10                                     | Ho sostenuto spese per farmaci supplementari o integratori per la mia malattia                                                                    |
| Q27                                        | 9                                      | Ho sostenuto spese per una o più visite private per la mia malattia                                                                               |
| Q28                                        | 11                                     | Devo sostenere spese per cure integrative a mio carico (es. fisioterapia, psicoterapia, cure odontoiatriche)                                      |
| Q49                                        | 8                                      | Il Servizio Sanitario Nazionale copre tutti i costi sanitari associati alla mia malattia                                                          |
| Q68                                        | 1                                      | Sono in grado di sostenere le mie spese mensili senza difficoltà (ad esempio per affitto, elettricità, telefono...)                               |
| Q76                                        | 3                                      | Sono preoccupata/o dei problemi economici che potrei avere in futuro a causa della malattia                                                       |
| Q85                                        | 2                                      | La mia malattia ha ridotto le mie disponibilità economiche                                                                                        |
| Q86                                        | 4                                      | La mia condizione economica incide sulle mie possibilità di curarmi                                                                               |
| Q90                                        |                                        | I miei problemi economici mi preoccupano                                                                                                          |
| Q95                                        |                                        | La mia famiglia ha dovuto sostenere i costi di trasporto, vitto e alloggio per curarmi in una città diversa da quella in cui vivo                 |
| Q99                                        | 7                                      | Sono preoccupata/o di non riuscire a lavorare a causa della malattia                                                                              |
| Q102                                       |                                        | Ho perso molti giorni lavorativi a causa della mia malattia                                                                                       |
| Q103                                       |                                        | Non riesco a guadagnare come prima per via della mia malattia                                                                                     |
| Q106                                       |                                        | Ho dovuto smettere di lavorare a causa della mia malattia                                                                                         |
| Q107                                       |                                        | Ho ridotto le ore al lavoro a causa della mia malattia                                                                                            |
| Q111                                       | 14                                     | Il personale sanitario (cioè medici, infermieri, etc.) ha agevolato il percorso di cura                                                           |
| Q112                                       | 15                                     | Il personale ospedaliero amministrativo (cioè centro di prenotazione, segreterie, etc.) ha agevolato il percorso di cura                          |
| Q113                                       | 16                                     | C'è stata comunicazione tra i medici e le strutture sanitarie che mi seguono                                                                      |
| Q114                                       |                                        | Il medico di famiglia ha agevolato il percorso di cura                                                                                            |
| Q121                                       | 5                                      | Ho ridotto le spese per attività ricreative come vacanze, ristoranti o spettacoli per affrontare le spese della mia malattia                      |
| Q122                                       | 6                                      | Ho ridotto le spese per acquisti essenziali (ad esempio il cibo) per affrontare le spese per la mia malattia                                      |
| Q138                                       |                                        | I servizi di trasporto per raggiungere l'ospedale (mezzi pubblici, parcheggi) sono scarsi                                                         |
| Q139                                       |                                        | Ho dovuto sostenere i costi di trasporto, vitto e alloggio per curarmi in una città diversa da quella in cui vivo                                 |
| Q140                                       | 13                                     | Ho dovuto sostenere rilevanti costi di trasporto per curarmi                                                                                      |
| Q141                                       | 12                                     | Il centro di cura è lontano dalla mia abitazione                                                                                                  |
| Q151                                       |                                        | È stato facile ottenere le agevolazioni economiche a cui ho diritto (ad esempio esenzione dal ticket, assegni o pensioni di invalidità)           |
| Q156                                       |                                        | So che la mia malattia mi dà diritto ad agevolazioni economiche (ad esempio esenzione dal ticket, assegni o pensioni di invalidità)               |

## Questionnaire development

The first step of the analysis was estimating the between-item correlation matrix. Because of the ordinal nature of the items the pairwise Spearman rank correlation coefficients ( $r_s$ ) were used.

We ascertained that there were about a third (68/184, 37%) of missing responses for the five job items from patients, who declared themselves retired or jobless (i.e. househusbands, housewives or individuals in search of employment); thus we decided to estimate two separate bivariate correlation matrices, one limited to job items, where only the 116 cases without missing information were used (**Table S2a below**), and one for all the other items, where the complete sample of 184 cases was used (**Table S2b below**). For every pair, whose  $r_s > 0.65$ , the item with the greater score in the previously published importance analysis was retained.

At the end of this preliminary analysis, six items (Q103, Q106, Q107, Q90, Q95, Q139) were excluded, because  $r_s$  was greater than 0.65, leading to 9 outcome and 15 determinant items for subsequent analyses. Out of the five job items, two were retained, one outcome (Q99) and one determinant (Q102).



Table S2. Spearman correlation coefficients between items

Table S2a. Job items

|      | Q99  | Q102 | Q103 | Q106 | Q107 |
|------|------|------|------|------|------|
| Q99  | 1    |      |      |      |      |
| Q102 | 0,63 | 1    |      |      |      |
| Q103 | 0,72 | 0,66 | 1    |      |      |
| Q106 | 0,55 | 0,50 | 0,60 | 1    |      |
| Q107 | 0,56 | 0,67 | 0,67 | 0,78 | 1    |

Table S2b. All other items

|      | Q1    | Q2    | Q5    | Q26   | Q27   | Q28   | Q49   | Q68   | Q76   | Q85   | Q86   | Q90   | Q95   | Q111  | Q112  | Q113  | Q114  | Q121  | Q122  | Q138  | Q139  | Q140  | Q141  | Q151 | Q156 |
|------|-------|-------|-------|-------|-------|-------|-------|-------|-------|-------|-------|-------|-------|-------|-------|-------|-------|-------|-------|-------|-------|-------|-------|------|------|
| Q1   | 1     |       |       |       |       |       |       |       |       |       |       |       |       |       |       |       |       |       |       |       |       |       |       |      |      |
| Q2   | 0,29  | 1     |       |       |       |       |       |       |       |       |       |       |       |       |       |       |       |       |       |       |       |       |       |      |      |
| Q5   | -0,08 | -0,05 | 1     |       |       |       |       |       |       |       |       |       |       |       |       |       |       |       |       |       |       |       |       |      |      |
| Q26  | -0,18 | -0,13 | 0,22  | 1     |       |       |       |       |       |       |       |       |       |       |       |       |       |       |       |       |       |       |       |      |      |
| Q27  | -0,16 | -0,04 | 0,33  | 0,30  | 1     |       |       |       |       |       |       |       |       |       |       |       |       |       |       |       |       |       |       |      |      |
| Q28  | -0,07 | -0,03 | 0,40  | 0,36  | 0,40  | 1     |       |       |       |       |       |       |       |       |       |       |       |       |       |       |       |       |       |      |      |
| Q49  | 0,18  | 0,15  | -0,23 | -0,46 | -0,27 | -0,41 | 1     |       |       |       |       |       |       |       |       |       |       |       |       |       |       |       |       |      |      |
| Q68  | 0,09  | 0,15  | -0,03 | -0,25 | -0,09 | -0,13 | 0,34  | 1     |       |       |       |       |       |       |       |       |       |       |       |       |       |       |       |      |      |
| Q76  | -0,22 | -0,10 | 0,21  | 0,41  | 0,29  | 0,29  | -0,32 | -0,45 | 1     |       |       |       |       |       |       |       |       |       |       |       |       |       |       |      |      |
| Q85  | -0,18 | -0,04 | 0,27  | 0,46  | 0,31  | 0,37  | -0,41 | -0,41 | 0,65  | 1     |       |       |       |       |       |       |       |       |       |       |       |       |       |      |      |
| Q86  | -0,24 | -0,11 | 0,27  | 0,40  | 0,39  | 0,34  | -0,46 | -0,44 | 0,56  | 0,57  | 1     |       |       |       |       |       |       |       |       |       |       |       |       |      |      |
| Q90  | -0,21 | -0,15 | 0,16  | 0,34  | 0,22  | 0,26  | -0,29 | -0,53 | 0,71  | 0,67  | 0,70  | 1     |       |       |       |       |       |       |       |       |       |       |       |      |      |
| Q95  | -0,23 | -0,10 | 0,19  | 0,25  | 0,29  | 0,30  | -0,23 | -0,12 | 0,20  | 0,33  | 0,28  | 0,21  | 1     |       |       |       |       |       |       |       |       |       |       |      |      |
| Q111 | 0,35  | 0,25  | -0,26 | -0,26 | -0,30 | -0,29 | 0,38  | 0,14  | -0,11 | -0,17 | -0,31 | -0,13 | -0,17 | 1     |       |       |       |       |       |       |       |       |       |      |      |
| Q112 | 0,25  | 0,10  | -0,12 | -0,20 | -0,15 | -0,16 | 0,41  | 0,10  | -0,17 | -0,18 | -0,31 | -0,14 | -0,10 | 0,53  | 1     |       |       |       |       |       |       |       |       |      |      |
| Q113 | 0,21  | 0,13  | -0,20 | -0,05 | -0,45 | -0,22 | 0,22  | 0,00  | -0,11 | -0,07 | -0,22 | -0,15 | -0,11 | 0,43  | 0,33  | 1     |       |       |       |       |       |       |       |      |      |
| Q114 | 0,15  | 0,09  | -0,23 | -0,10 | -0,17 | -0,24 | 0,12  | 0,25  | -0,24 | -0,12 | -0,24 | -0,24 | 0,02  | 0,37  | 0,38  | 0,28  | 1     |       |       |       |       |       |       |      |      |
| Q121 | -0,21 | -0,15 | 0,12  | 0,31  | 0,36  | 0,28  | -0,21 | -0,41 | 0,57  | 0,59  | 0,48  | 0,62  | 0,28  | -0,06 | -0,09 | -0,17 | -0,10 | 1     |       |       |       |       |       |      |      |
| Q122 | -0,08 | -0,09 | 0,09  | 0,36  | 0,25  | 0,31  | -0,37 | -0,47 | 0,48  | 0,49  | 0,64  | 0,66  | 0,33  | -0,15 | -0,17 | -0,15 | -0,10 | 0,57  | 1     |       |       |       |       |      |      |
| Q138 | -0,08 | -0,05 | 0,28  | 0,25  | 0,22  | 0,27  | -0,30 | -0,17 | 0,24  | 0,34  | 0,31  | 0,31  | 0,08  | -0,24 | -0,23 | -0,03 | -0,15 | 0,18  | 0,34  | 1     |       |       |       |      |      |
| Q139 | -0,23 | -0,02 | 0,18  | 0,28  | 0,33  | 0,36  | -0,25 | -0,19 | 0,26  | 0,36  | 0,34  | 0,23  | 0,69  | -0,14 | -0,10 | -0,07 | -0,02 | 0,30  | 0,42  | 0,15  | 1     |       |       |      |      |
| Q140 | -0,17 | -0,04 | 0,27  | 0,30  | 0,33  | 0,29  | -0,27 | -0,21 | 0,28  | 0,41  | 0,33  | 0,31  | 0,59  | -0,20 | -0,10 | -0,02 | -0,04 | 0,38  | 0,45  | 0,27  | 0,66  | 1     |       |      |      |
| Q141 | -0,14 | 0,02  | 0,16  | 0,09  | 0,11  | 0,10  | -0,02 | -0,08 | 0,11  | 0,18  | 0,12  | 0,12  | 0,34  | -0,04 | 0,04  | 0,05  | -0,13 | 0,10  | 0,18  | 0,11  | 0,45  | 0,55  | 1     |      |      |
| Q151 | 0,10  | 0,11  | -0,15 | -0,21 | -0,15 | -0,11 | 0,27  | 0,24  | -0,20 | -0,29 | -0,29 | -0,24 | -0,09 | 0,18  | 0,20  | 0,17  | 0,20  | -0,22 | -0,21 | -0,10 | -0,18 | -0,18 | -0,07 | 1    |      |
| Q156 | 0,15  | 0,27  | -0,02 | -0,14 | -0,03 | -0,07 | 0,33  | 0,39  | -0,18 | -0,22 | -0,32 | -0,25 | -0,07 | 0,22  | 0,23  | 0,20  | 0,18  | -0,15 | -0,32 | -0,22 | -0,13 | -0,08 | 0,01  | 0,35 | 1    |

## Exploratory Factor Analysis (EFA)

### EFA on Outcome

EFA on the 9-outcome correlation matrix was performed by Principal Axis Factor (PAF) extraction option of SPSS, with VARIMAX rotation, in the sample of 116 subjects with complete information, because of the presence of the job item Q99.

The items considered at the start were Q5, Q68, Q76, Q85, Q86, Q99, Q121, Q122, Q151. In the initial factor solution, three factors met the Kaiser criterion of eigenvalue >1 and accounted for 66% of the variance, the first axis alone explaining 41% of the total variance (see Table and scree plot below).

| Factor | Total | % of variance | Cumulative % |
|--------|-------|---------------|--------------|
| 1      | 3.645 | 40.501        | 40.501       |
| 2      | 1.185 | 13.163        | 53.665       |
| 3      | 1.079 | 11.986        | 65.651       |
| 4      | 0.819 | 9.105         | 74.756       |
| 5      | 0.656 | 7.286         | 82.042       |
| 6      | 0.533 | 5.927         | 87.969       |
| 7      | 0.492 | 5.470         | 93.439       |
| 8      | 0.304 | 3.383         | 96.821       |
| 9      | 0.286 | 3.179         | 100.000      |

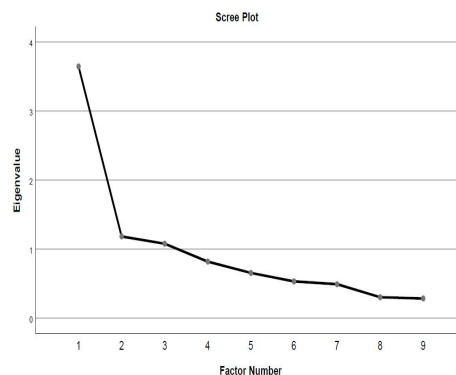

Communalities and unrotated factor loadings are reported in the table below.

|             | Communalities |            | Factor |        |        |
|-------------|---------------|------------|--------|--------|--------|
|             | Initial       | Extraction | 1      | 2      | 3      |
| <b>Q5</b>   | 0.133         | 0.31       | 0.261  | 0.203  | -0.448 |
| <b>Q68</b>  | 0.233         | 0.266      | -0.452 | 0.248  | -0.020 |
| <b>Q76</b>  | 0.574         | 0.653      | 0.793  | 0.152  | -0.027 |
| <b>Q85</b>  | 0.605         | 0.729      | 0.819  | 0.238  | 0.034  |
| <b>Q86</b>  | 0.510         | 0.677      | 0.723  | -0.305 | -0.248 |
| <b>Q99</b>  | 0.248         | 0.344      | 0.424  | 0.387  | 0.119  |
| <b>Q121</b> | 0.471         | 0.593      | 0.704  | 0.118  | 0.290  |
| <b>Q122</b> | 0.437         | 0.623      | 0.630  | -0.458 | 0.131  |
| <b>Q151</b> | 0.089         | 0.116      | -0.265 | -0.018 | 0.214  |

The item Q151 shows communality <0.20, Child 2006), and factor loadings <0.3 (Field, 2013) with all three factors, and was removed from further analyses.

Analogously at the next step the item Q5 was removed (communality = 0.072).

Eventually, seven items were retained with two factors meeting the Kaiser criterion of eigenvalue >1.

Communalities and factor loadings after Varimax rotation in the reduced sample of 116 patients are reported below. Many items cross loaded on both axes, that seemed both expression of financial burden: after rotation, the first one was more correlated with items mirroring an actual severe burden (Q68, Q86, Q122), while the second one appeared more correlated with worries about the future.

|             | Communalities |            | Factor |        |
|-------------|---------------|------------|--------|--------|
|             | Initial       | Extraction | 1      | 2      |
| <b>Q68</b>  | 0.222         | 0.269      | -0.498 | -0.145 |
| <b>Q76</b>  | 0.570         | 0.648      | 0.468  | 0.655  |
| <b>Q85</b>  | 0.600         | 0.737      | 0.413  | 0.753  |
| <b>Q86</b>  | 0.491         | 0.588      | 0.719  | 0.266  |
| <b>Q99</b>  | 0.247         | 0.356      | 0.012  | 0.596  |
| <b>Q121</b> | 0.470         | 0.510      | 0.397  | 0.594  |
| <b>Q122</b> | 0.426         | 0.566      | 0.735  | 0.159  |

The previous interpretation might imply that some correlation between axes would be expected. Thus, the oblique Promax rotation was applied. The same seven-item final solution was found with two factors meeting the Kaiser criterion of eigenvalue >1, and findings were reinforced. The factor loadings with Promax rotation are reported below.

|             | Factor |        |
|-------------|--------|--------|
|             | 1      | 2      |
| <b>Q68</b>  | -0.549 | 0.047  |
| <b>Q76</b>  | 0.248  | 0.616  |
| <b>Q85</b>  | 0.129  | 0.766  |
| <b>Q86</b>  | 0.764  | 0.004  |
| <b>Q99</b>  | -0.292 | 0.753  |
| <b>Q121</b> | 0.191  | 0.571  |
| <b>Q122</b> | 0.839  | -0.140 |

The same analysis was repeated in the whole sample, replacing the missing information on the Q99 job in the 68 cases with the average score of the other items. We did that, according to the protocol, for both increasing the power of the analysis and as a sensitivity analysis of findings in the restricted sample. We chose to input the average score rather than the minimum score (that would sound *I am not worried at all that I will not be able to work due to my illness*) because it could be true for retired people (at least in the Italian population), but not for younger people without job. We think, indeed, that imputing the minimum score would definitely bias the score toward the null, while imputing the average could possibly only slightly overestimate the financial issues. Further, this choice is consistent with the calculus of the score, where the missing items are not considered in the denominator. This question will be further dealt with in the next validation steps. In the full sample similar and stronger results were found: items Q151 and Q5 were removed because of low communalities (both <0.10). With the eventual 7-item analysis only the first axis met the Kaiser criterion of eigenvalue >1. Communalities and factor loadings in the complete sample are reported below. With one factor extracted no rotation was needed.

|             | Communalities |            | Factor<br>1 |
|-------------|---------------|------------|-------------|
|             | Initial       | Extraction |             |
| <b>Q68</b>  | 0.309         | 0.309      | -0.556      |
| <b>Q76</b>  | 0.555         | 0.622      | 0.788       |
| <b>Q85</b>  | 0.582         | 0.647      | 0.805       |
| <b>Q86</b>  | 0.534         | 0.547      | 0.739       |
| <b>Q99</b>  | 0.318         | 0.273      | 0.522       |
| <b>Q121</b> | 0.494         | 0.537      | 0.733       |
| <b>Q122</b> | 0.506         | 0.485      | 0.697       |

Therefore, the PROFFIT FT-score includes 7 outcome items.

## EFA on Determinants

EFA on the 15-outcome correlation matrix was performed by Principal Axis Factor (PAF) extraction option of SPSS, with VARIMAX rotation, in the sample of 116 subjects with complete information, because of the presence of the job item Q102.

The items considered at the start were Q1, Q2, Q26, Q27, Q28, Q49, Q102, Q111, Q112, Q113, Q114, Q138, Q140, Q141, Q156. In principle, the 15 determinants could be expression of three categories: (i) direct medical expenses (Q26, Q27, Q28, Q49), (ii) indirect costs due to travelling needs for medical care (Q138, Q140, Q141), (iii) indirect costs due to bureaucracy (Q1, Q2, Q111, Q112, Q113, Q114, Q156), plus a single job item (Q102).

In the initial factor solution, five factors met the Kaiser criterion of eigenvalue >1 and accounted for 62% of the variance (Table below), but the first axis explained only the 26% of the total variance.

| Factor | Total | % of variance | Cumulative % |
|--------|-------|---------------|--------------|
| 1      | 3.869 | 25.793        | 25.793       |
| 2      | 1.851 | 12.341        | 38.133       |
| 3      | 1.403 | 9.356         | 47.490       |
| 4      | 1.135 | 7.567         | 55.057       |
| 5      | 1.041 | 6.943         | 62.000       |
| 6      | 0.975 | 6.502         | 68.503       |
| 7      | 0.825 | 5.501         | 74.004       |
| 8      | 0.766 | 5.104         | 79.107       |
| 9      | 0.664 | 4.425         | 83.532       |
| 10     | 0.583 | 3.885         | 87.417       |
| 11     | 0.554 | 3.696         | 91.113       |
| 12     | 0.416 | 2.774         | 93.887       |
| 13     | 0.364 | 2.426         | 96.313       |
| 14     | 0.326 | 2.171         | 98.484       |
| 15     | 0.227 | 1.516         | 100.000      |

The job item Q102 had the smallest communality (0.183) and was removed. All the other items had complete responses, thus it seemed meaningless to continue in the restricted sample, and the subsequent analysis was only performed in the complete sample, where all of the responses were available.

The initial factor solution with 14 items in the full sample is reported below. Almost nothing changed: five factors met the Kaiser criterion of eigenvalue >1 and accounted for 63% of the variance, and the first axis explained only the 26% of the total variance.

| Factor | Total | % of variance | Cumulative % |
|--------|-------|---------------|--------------|
| 1      | 3.571 | 25.508        | 25.508       |
| 2      | 1.712 | 12.232        | 37.740       |
| 3      | 1.290 | 9.211         | 46.951       |
| 4      | 1.223 | 8.733         | 55.684       |
| 5      | 1.078 | 7.703         | 63.387       |
| 6      | 0.869 | 6.207         | 69.594       |
| 7      | 0.776 | 5.543         | 75.136       |
| 8      | 0.735 | 5.253         | 80.389       |
| 9      | 0.649 | 4.635         | 85.023       |
| 10     | 0.554 | 3.954         | 88.978       |
| 11     | 0.451 | 3.219         | 92.197       |
| 12     | 0.413 | 2.949         | 95.146       |
| 13     | 0.373 | 2.662         | 97.808       |
| 14     | 0.307 | 2.192         | 100.000      |

At the next steps items Q1, Q2, Q156, Q138 and Q114 were removed in turn because of small communalities, leading to the final solution with nine items and four factors retained. Communalities and factor loadings in the complete sample are reported below.

|      | Communalities |            | Factor |        |        |        |
|------|---------------|------------|--------|--------|--------|--------|
|      | Initial       | Extraction | 1      | 2      | 3      | 4      |
| Q26  | 0.305         | 0.425      | 0.628  | -0.113 | 0.124  | 0.050  |
| Q27  | 0.374         | 0.597      | 0.350  | 0.010  | 0.183  | 0.664  |
| Q28  | 0.335         | 0.453      | 0.604  | -0.048 | 0.137  | 0.259  |
| Q49  | 0.393         | 0.576      | -0.660 | 0.372  | -0.012 | -0.045 |
| Q111 | 0.369         | 0.487      | -0.210 | 0.592  | -0.081 | -0.294 |
| Q112 | 0.333         | 0.610      | -0.144 | 0.765  | 0.039  | -0.049 |
| Q113 | 0.319         | 0.556      | 0.001  | 0.332  | 0.059  | -0.665 |
| Q140 | 0.426         | 0.741      | 0.283  | -0.069 | 0.803  | 0.105  |
| Q141 | 0.316         | 0.449      | 0.009  | 0.033  | 0.669  | 0.005  |

Seemingly the first axis is related to direct medical expenses, the second axis to health bureaucracy items and the third axis to travelling costs, but some cross load on the factors is present.

Therefore we decided to retain the nine determinant items as single items in the final questionnaire.

## Convergent validity

We said above that the PROFFIT FT-score includes 7 outcome items. In the table below correlation between each item and the total score of the scale, removing that item from the sum (convergent validity), is reported. Correlations are quite good, all  $r_s$  being greater than 0.5 in the full sample.

Table S3. Spearman correlation coefficients between each item and total score\*

| Item number | Full sample (N=184) | Restricted sample (N=116) |
|-------------|---------------------|---------------------------|
| 1           | 0.5325              | 0.5243                    |
| 2           | 0.7360              | 0.7267                    |
| 3           | 0.7251              | 0.7158                    |
| 4           | 0.6646              | 0.6559                    |
| 5           | 0.6887              | 0.6765                    |
| 6           | 0.6712              | 0.6626                    |
| 7           | 0.5537              | 0.3684                    |

\*calculated removing each item from the sum

## Repeatability

Agreement between repeated measurements was assessed by intra-class correlation coefficient (ICC) and weighted Cohen's Kappa coefficient. Scores were stable enough over time, with ICCs ranging from 0.56 and 0.79. ICC was equal to 0.81 for the FT-score.

Table S4. Test-retest results

|                          | ICC         | Weighted K  | Agreement % |
|--------------------------|-------------|-------------|-------------|
| <b>Outcome items</b>     |             |             |             |
| Item 1                   | 0.70        | 0.70        | 95.7        |
| Item 2                   | 0.68        | 0.68        | 93.7        |
| Item 3                   | 0.56        | 0.56        | 90.7        |
| Item 4                   | 0.64        | 0.64        | 93.2        |
| Item 5                   | 0.65        | 0.65        | 91.0        |
| Item 6                   | 0.65        | 0.65        | 93.9        |
| Item 7                   | 0.79        | 0.81        | 94.4        |
| <b>FT-score</b>          | <b>0.81</b> | <b>0.82</b> | <b>97.4</b> |
| <b>Determinant items</b> |             |             |             |
| Item 8                   | 0.61        | 0.61        | 94.4        |
| Item 9                   | 0.72        | 0.72        | 94.2        |
| Item 10                  | 0.65        | 0.65        | 93.0        |
| Item 11                  | 0.61        | 0.62        | 92.4        |
| Item 12                  | 0.79        | 0.79        | 96.6        |
| Item 13                  | 0.78        | 0.78        | 92.2        |
| Item 14                  | 0.53        | 0.52        | 96.5        |
| Item 15                  | 0.59        | 0.58        | 95.0        |
| Item 16                  | 0.61        | 0.61        | 93.9        |



Table S5. Association of FT score with baseline characteristics of patients

|                                                          | Median      | (IQR)              | P (Mann-Whitney) |
|----------------------------------------------------------|-------------|--------------------|------------------|
| <b>All patients</b>                                      | 38.1        | (23.8-57.1)        |                  |
| <b>Region of the hospital</b>                            |             |                    | <b>0.005</b>     |
| North                                                    | <b>28.6</b> | <b>(14.3-47.6)</b> |                  |
| Center                                                   | <b>33.3</b> | <b>(23.8-61.9)</b> |                  |
| South                                                    | <b>42.9</b> | <b>(23.8-57.1)</b> |                  |
| Islands                                                  | <b>52.4</b> | <b>(33.3-57.1)</b> |                  |
| <b>Gender</b>                                            |             |                    | 0.932            |
| Female                                                   | 38.1        | (23.8-57.1)        |                  |
| Male                                                     | 33.3        | (23.8-52.4)        |                  |
| <b>Age category</b>                                      |             |                    | <b>0.005</b>     |
| ≤65                                                      | <b>42.9</b> | <b>(23.8-57.1)</b> |                  |
| >65                                                      | <b>26.2</b> | <b>(14.3-47.6)</b> |                  |
| <b>Education level</b>                                   |             |                    | <b>0.018</b>     |
| Elementary/Middle school                                 | <b>42.9</b> | <b>(23.8-57.1)</b> |                  |
| High school/degree                                       | <b>33.3</b> | <b>(19.0-50.0)</b> |                  |
| <b>Cohabitant/Married</b>                                |             |                    | 0.298            |
| No                                                       | 33.3        | (23.8-52.4)        |                  |
| Yes                                                      | 38.1        | (23.8-57.1)        |                  |
| <b>With dependent family members</b>                     |             |                    | 0.060            |
| No                                                       | 33.3        | (19.0-52.4)        |                  |
| Yes                                                      | 42.9        | (28.6-57.1)        |                  |
| <b>Family members with cancer or chronic disease</b>     |             |                    | <b>0.017</b>     |
| No                                                       | <b>31.0</b> | <b>(19.0-52.4)</b> |                  |
| Yes                                                      | <b>42.9</b> | <b>(23.8-57.1)</b> |                  |
| <b>Working status</b>                                    |             |                    | 0.531            |
| Not working                                              | 33.3        | (19.0-52.4)        |                  |
| Working                                                  | 38.1        | (23.8-57.1)        |                  |
| <b>Site of treatment</b>                                 |             |                    | 0.134            |
| Within the region of residency                           | 38.1        | (23.8-57.1)        |                  |
| Outside the region of residency                          | 28.6        | (19.0-42.9)        |                  |
| <b>Time (years) from initial diagnosis</b>               |             |                    | 0.920            |
| ≤1                                                       | 38.1        | (23.8-57.1)        |                  |
| 1-5                                                      | 33.3        | (23.8-52.4)        |                  |
| ≥5                                                       | 33.3        | (19.0-61.9)        |                  |
| <b>Previous surgery</b>                                  |             |                    | 0.175            |
| No                                                       | 42.9        | (23.8-61.9)        |                  |
| Yes                                                      | 33.3        | (23.8-52.4)        |                  |
| <b>Last/ongoing anticancer treatment at registration</b> |             |                    | 0.546            |
| Chemotherapy                                             | 38.1        | (23.8-57.1)        |                  |
| Target-based agents                                      | 40.5        | (23.8-52.4)        |                  |
| Immunotherapy                                            | 28.6        | (9.5-47.6)         |                  |
| Hormonal therapy                                         | 38.1        | (33.3-42.9)        |                  |
| Radiotherapy                                             | 28.6        | (28.6-28.6)        |                  |
